# Supplementary material
Source: PubMed Central journal article supplement (PMC5381726)
Supplement: NIHMS854730-supplement-Supp_Figs_S1-S9.pdf [file NIHMS854730-supplement-Supp_Figs_S1-S9.pdf]

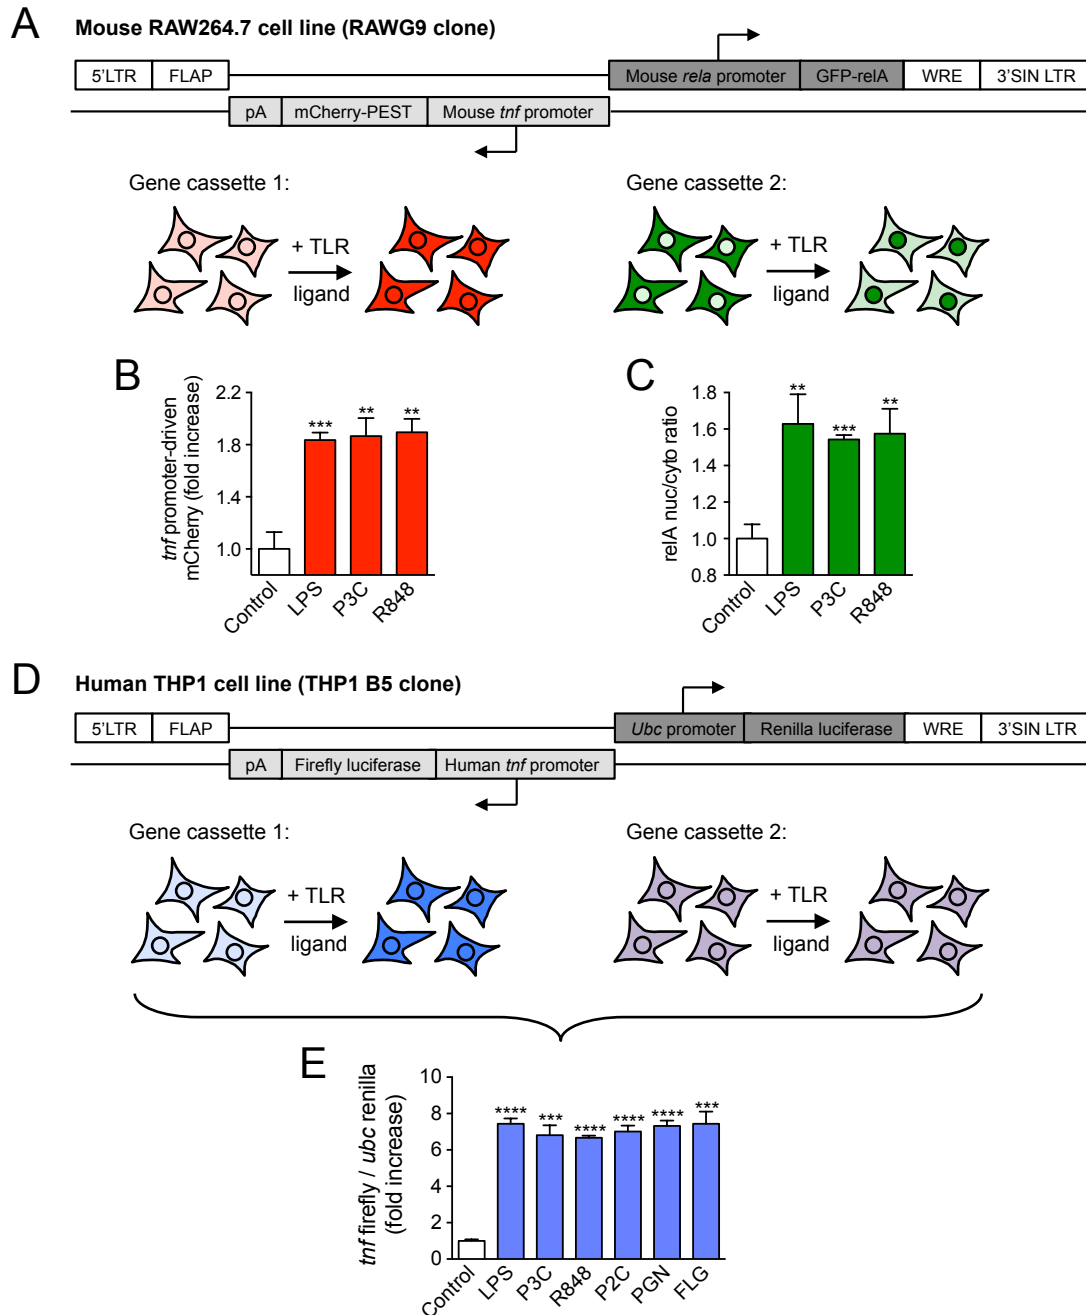

**Fig. S1. Design and TLR ligand response of mouse and human macrophage reporter cell lines for siRNA screening applications.** (A) Design of the dual-promoter lentiviral vector for the expression of NF- $\kappa$ B and TNF- $\alpha$  reporters in the mouse RAW264.7 cell line-derived RAW G9 clone. Gene cassette 1 contains the mouse *Tnf* promoter driving expression of an mCherry-PEST fusion protein, and gene cassette 2 contains the mouse *Rela* promoter driving expression of a GFP-relA fusion protein. (B and C) *Tnf* promoter-driven mCherry expression at 16 hours (B) and the cytosol-to-nuclear translocation of the GFP-RelA fusion at 40 min (C) in RAW G9 cells after treatment with LPS (10 ng/ml), 100 nM P3C, or R848 (10  $\mu$ g/ml). (D) Design of the dual-promoter lentiviral vector for expression of the TNF- $\alpha$  reporter in the human THP1 cell line-derived THP1 B5 clone. Gene cassette 1 contains the human *TNF* promoter driving TLR ligand-inducible expression of firefly luciferase, and gene cassette 2 contains the human *UBC* promoter driving constitutive expression of renilla luciferase. (E) The firefly:renilla luciferase expression ratio in THP1 B5 cells at 4 hours after treatment with LPS (10 ng/ml). Data in (B), (C), and (E) are means  $\pm$  SD of three experiments. \*\* $P$  < 0.01, \*\*\* $P$  < 0.001, \*\*\*\* $P$  < 0.0001 by two-tailed  $t$  test.

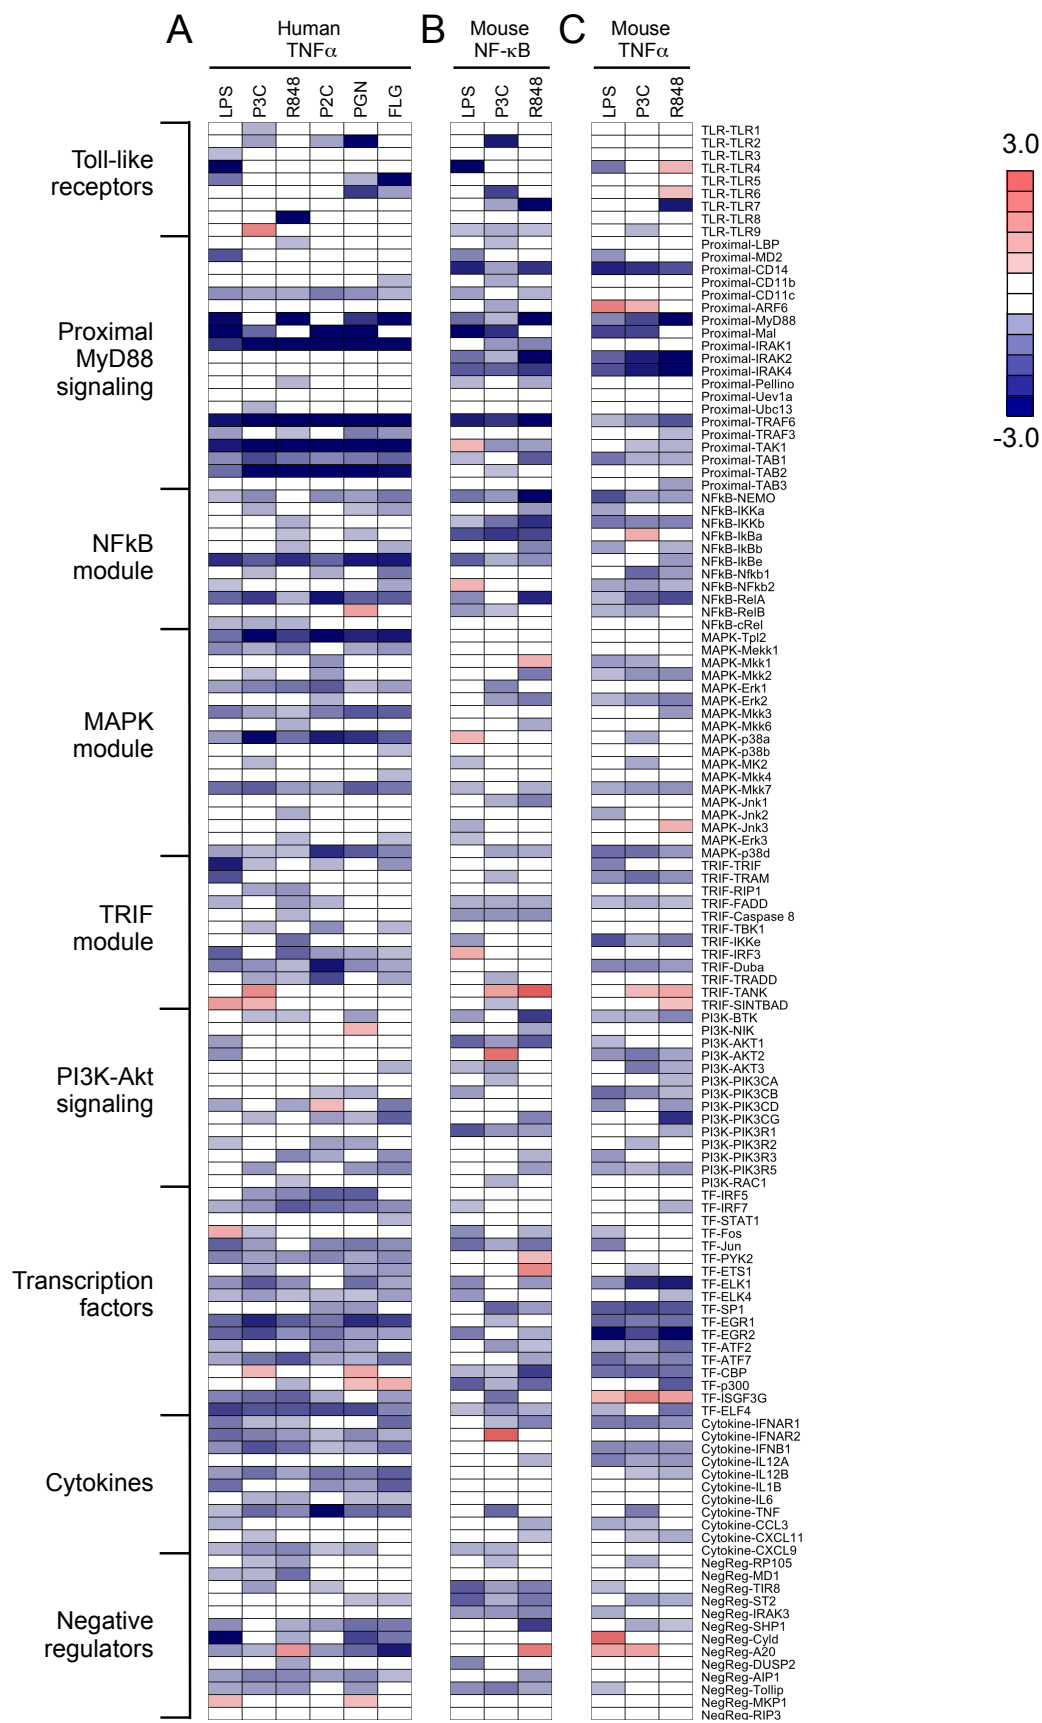

**Fig. S2. Effects of siRNA-mediated gene perturbations across the human and mouse TLR pathways.** (A to C) TLR pathway gene perturbation effects on (A) the *TNF* promoter-driven transcriptional response of human THP1 cells to LPS (10 ng/ml), 100 nM P3C, R848 (10 µg/ml), 1 nM P2C, PGN (10 µg/ml), or FLG (10 ng/ml) and (B) the NF-κB-driven and (C) the *Tnf* promoter-driven responses of mouse RAW264.7 cells to LPS (10 ng/ml), 100 nM P3C, or R848 (10 µg/ml). Data are equivalent to those shown in Fig. 2, A and D, but are enlarged to include TLR pathway modules and gene names. Data are presented as median z-scores from six siRNAs per gene. Individual siRNA z-scores were averaged from three (A) or two (B and C) independent experiments (see Materials and Methods for details).

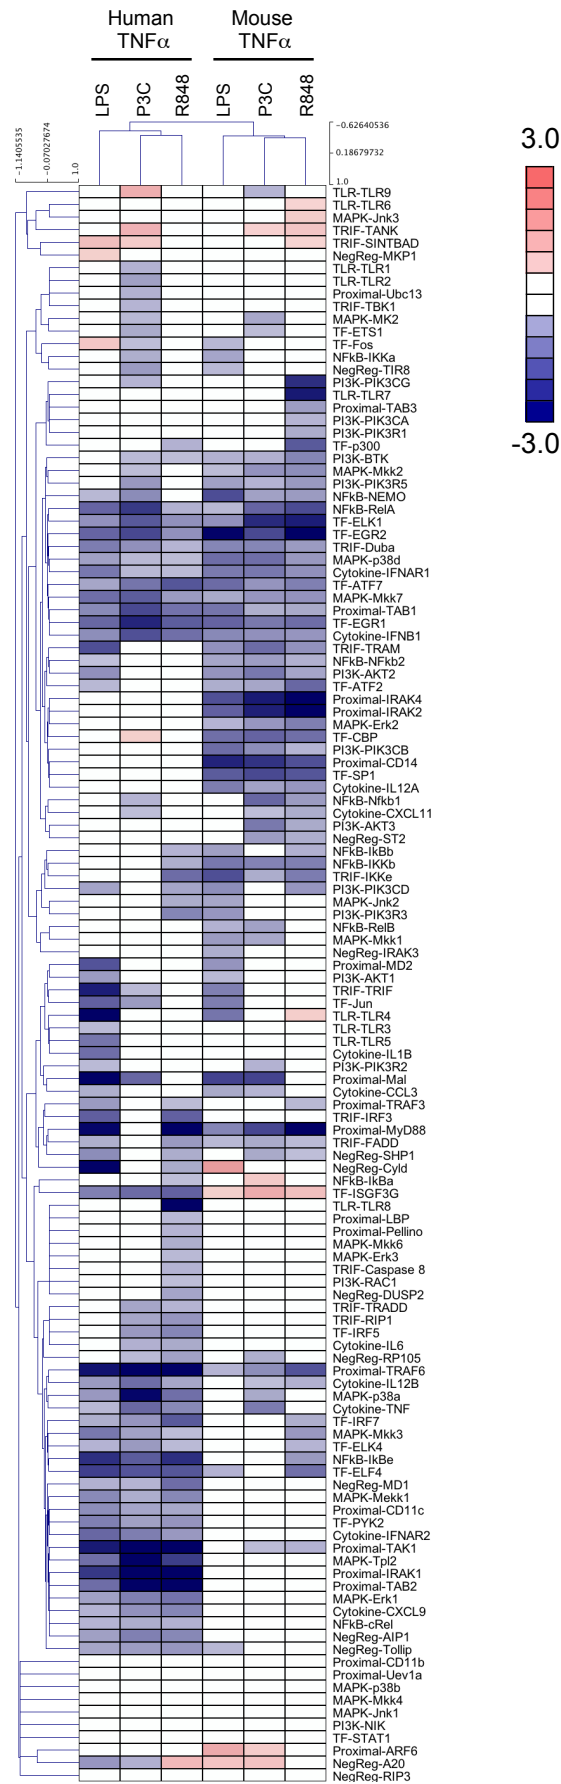

**Fig. S3. Human and mouse macrophages show both shared and distinct gene dependencies in TLR signaling.** Hierarchical clustering analysis (Pearson uncentered, average linkage) of the human and mouse macrophage *TNF/Tnf* promoter-driven responses to LPS, P3C, and R848. Data are equivalent to those shown in Fig. 3A, but are enlarged to include TLR pathway modules with gene names. Data are presented as median z-scores from six siRNAs per gene. Individual siRNA z-scores were averaged from three (human TNF- $\alpha$  readout) or two (mouse TNF- $\alpha$  readout) independent experiments (see Materials and Methods for details).

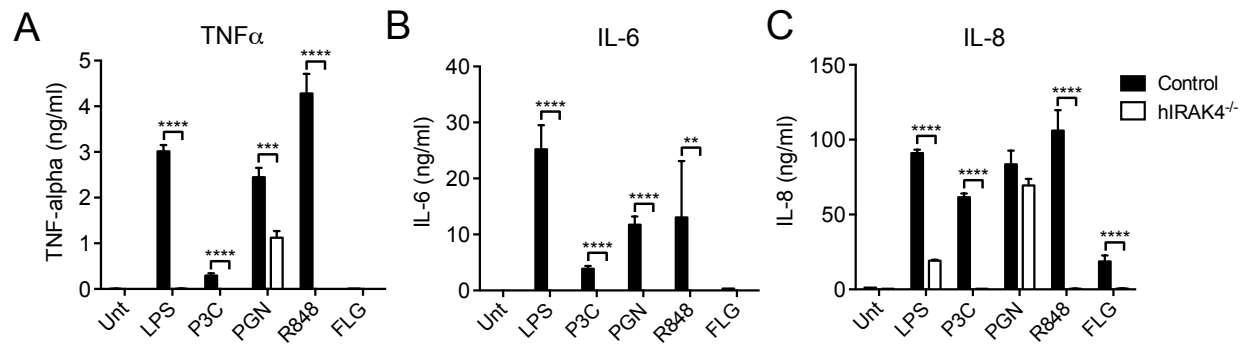

**Fig. S4. IRAK4 is required for the responses of human PBMCs to TLR ligands. (A to C)** Human PBMCs isolated from control and IRAK4-deficient human patients were stimulated for 24 hours with LPS (10 ng/ml), 100 nM P3C, PGN (10  $\mu$ g/ml), R848 (10  $\mu$ g/ml), or FLG (10 ng/ml) before the secreted amounts of the indicated cytokines were measured by Bioplex assay. Data are means  $\pm$  SD of two independent biological replicates from one set of patient blood samples. \*\* $P$  < 0.01, \*\*\* $P$  < 0.001, \*\*\*\* $P$  < 0.0001 by two-tailed  $t$  test.

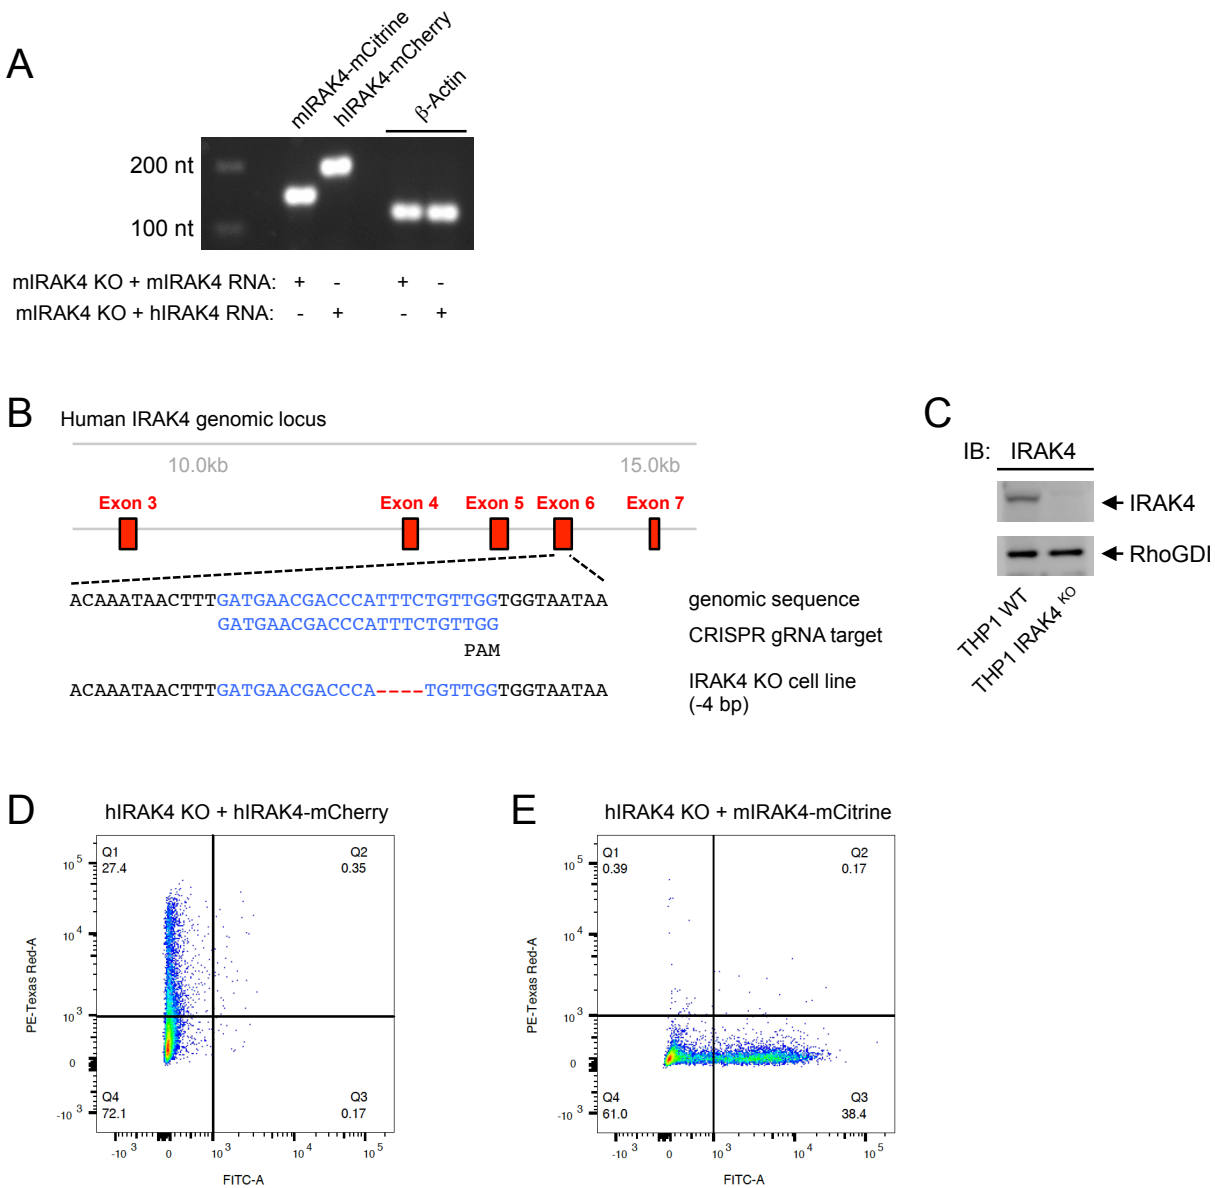

**Fig. S5. Generation of *IRAK4* rescue cell lines from *IRAK4* KO IMMs and THP1 cells.** (A) The relative abundances of the re-expressed mouse and human *IRAK4* fluorescent protein fusions in *IRAK4*-deficient mouse IMMs were measured by RT-PCR assays. The amounts of  $\beta$ -actin mRNA in each cell line are shown as RNA input controls. (B) Schematic showing the exons targeted for CRISPR/Cas9-mediated genome editing of the human *IRAK4* gene locus in THP1 cells. The guide RNA (gRNA) target sequence is shown with the 3' NGG PAM sequence, and the resulting genome edit within the gRNA for the *IRAK4* KO cell clone is indicated. (C) Western blotting analysis of WT THP1 cells and the THP1 *IRAK4* KO cell line was performed with antibody against *IRAK4*. (D and E) The relative abundances of the human *IRAK4*-mCherry (D, Texas Red channel) and the mouse *IRAK4*-mCitrine (E, FITC channel) fusion proteins re-expressed in the *IRAK4*-deficient human THP1 cell line were measured by flow cytometry. Data in (A) and (C) to (E) are representative of two independent experiments.

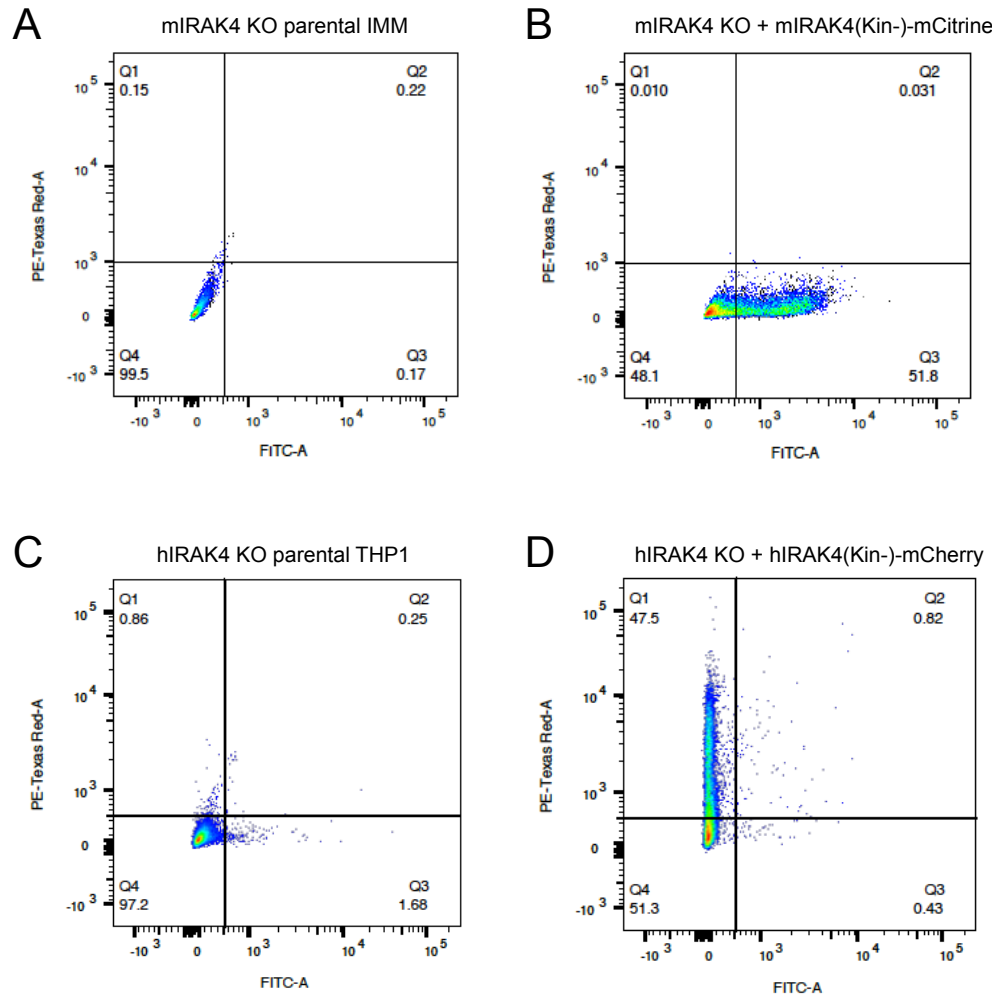

**Fig. S6. Expression of kinase-deficient mouse and human IRAK4 in IRAK4 KO mouse IMMs and THP1 cells.** (A and B) Flow cytometric analysis of the amount of the mouse IRAK4-mCitrine kinase-deficient mutant in retrovirally transduced IRAK4 KO IMMs (B, FITC channel) relative to that in parental IRAK4 KO IMMs (A). (C and D) Flow cytometric analysis of the amount of the human IRAK4-mCherry kinase-deficient mutant in retrovirally transduced IRAK4 KO THP1 cells (D, Texas Red channel) relative to that in the parental IRAK4 KO THP1 cell line (C). Data are representative of two independent measurements of cells at different passage numbers.

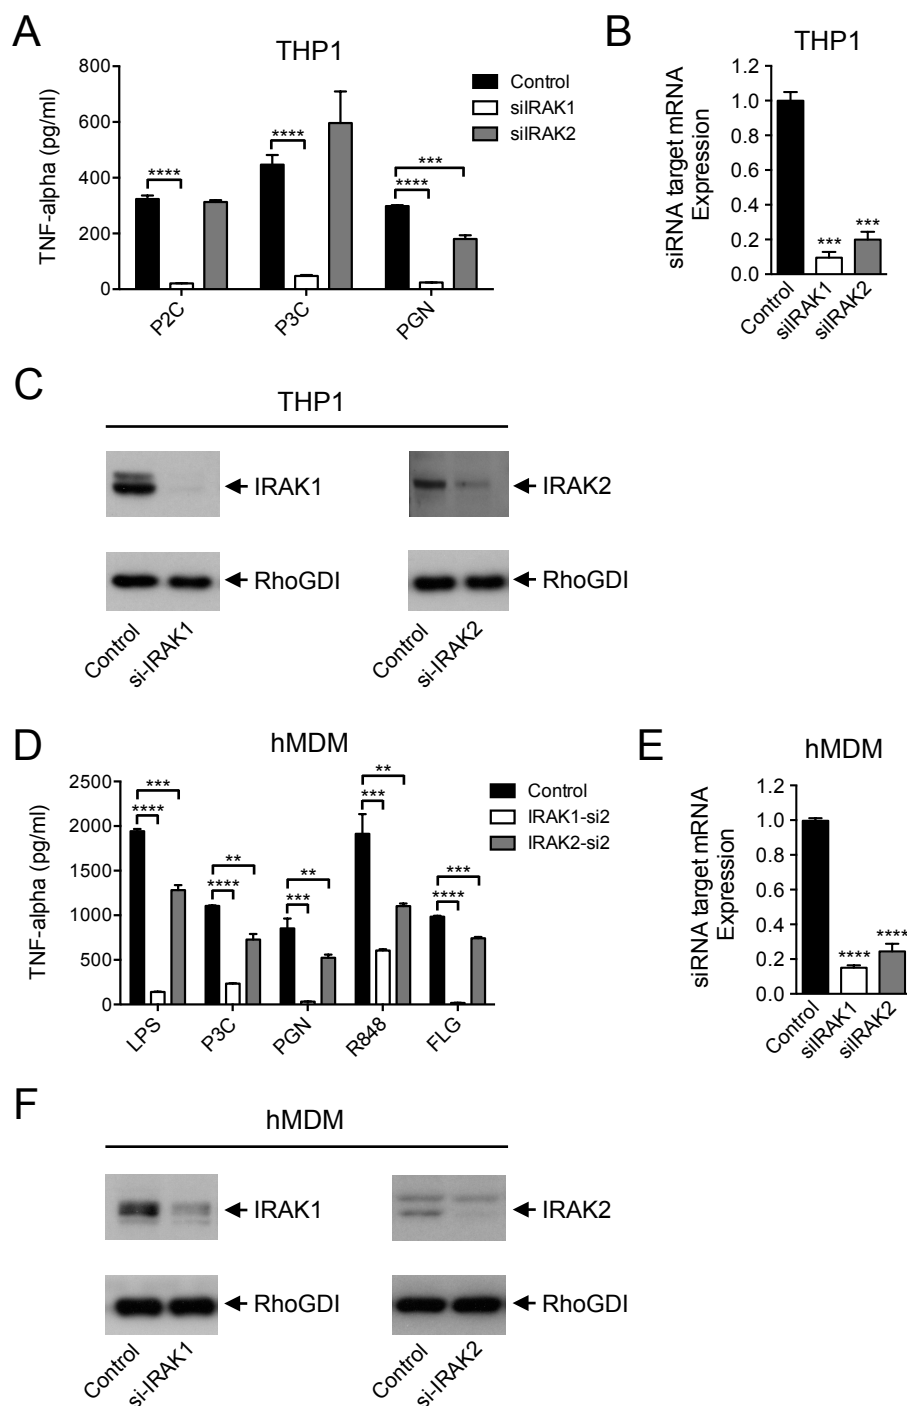

**Fig. S7. Analysis of the IRAK1-dependency of human macrophages for TLR responses.** (A) THP1 cells transfected with control, IRAK1-specific, or IRAK2-specific siRNA were stimulated with 10 nM P2C, 100 nM P3C, or PGN (10  $\mu$ g/ml) for 24 hours before the amounts of secreted TNF- $\alpha$  were measured. (B and C) THP1 B5 reporter cells transfected with control, IRAK1-specific, or IRAK2-specific siRNA were analyzed by qRT-PCR (B) and Western blotting assays (C) to determine the efficiency of target knockdown. Mean protein abundances in knockdown cells relative to those in control cells calculated from combined experiments were as follows: IRAK1:  $0.12 \pm 0.02$  ( $P < 0.0001$ ); IRAK2:  $0.20 \pm 0.02$  ( $P < 0.0001$ ). Statistical analysis was by

two-tailed *t* test. **(D)** hMDMs transfected with control, IRAK1-specific, or IRAK2-specific siRNA (different siRNAs from those shown in Fig. 5D) were stimulated for 24 hours with LPS (10 ng/ml), 100 nM P3C, PGN (10 µg/ml), R848 (10 µg/ml), or FLG (10 ng/ml) before the amounts of secreted TNF-α were measured by ELISA. **(E and F)** hMDMs transfected with control, IRAK1-specific, or IRAK2-specific siRNA were analyzed by qRT-PCR (**E**) and Western blotting assays (**F**) to determine the efficiency of target knockdown. Mean protein abundances in knockdown cells relative to those in control cells calculated from combined experiments were as follows: IRAK1:  $0.44 \pm 0.06$  ( $P < 0.01$ ); IRAK2:  $0.26 \pm 0.05$  ( $P < 0.001$ ). Statistical analysis was by two-tailed *t* test. Data in bar graphs are means  $\pm$  SD of three experiments. Western blots are representative of three independent experiments. \*\* $P < 0.01$ , \*\*\* $P < 0.001$ , \*\*\*\* $P < 0.0001$  by two-tailed *t* test.

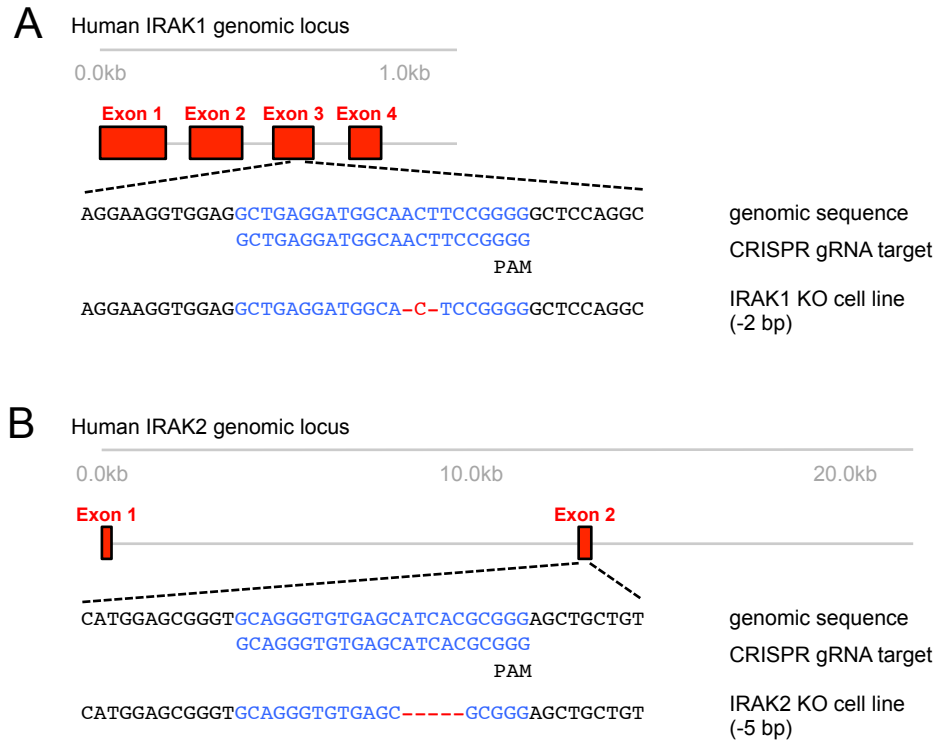

**Fig S8. CRISPR/Cas9-mediated targeting of the human *IRAK1* and *IRAK2* loci in THP1 cells.** (A and B) Schematics indicate the exons targeted for genome editing at the (A) *IRAK1* and (B) *IRAK2* human gene loci. In each case, the guide RNA (gRNA) target sequence is shown with the 3' NGG PAM sequence, and the resulting genome edit within the gRNA for each IRAK KO cell clone is indicated.

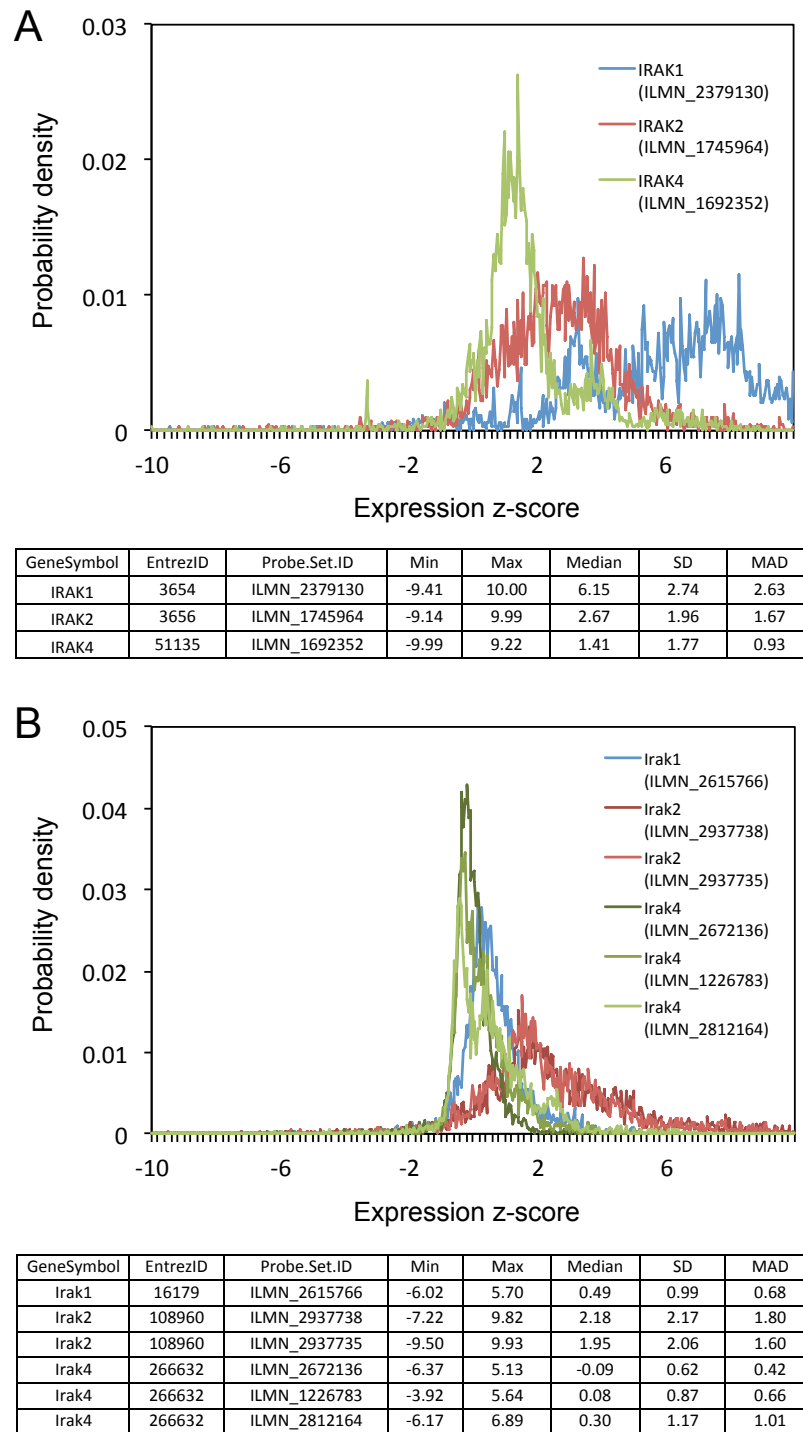

**Fig. S9. Expression distributions of IRAK1, IRAK2, and IRAK4 mRNAs in human and mouse GEO datasets.** (A and B) Probability distributions of the expression z-scores for (A) human *IRAK1*, *IRAK2*, and *IRAK4* and (B) mouse *Irak1*, *Irak2*, and *Irak4* calculated from all available normalized gene expression data for platforms GPL6884 (Illumina HumanWG-6 v3.0 expression beadchip) and GPL6885 (Illumina MouseRef-8 v2.0 expression beadchip). See Materials and Methods for details about the z-score calculation. Tables below the graphs show minimum, maximum, median, standard deviation, and median absolute deviation of the distributions for each IRAK gene probe. If multiple probes were available for the same gene, they are shown separately.

**Table S1. Details of the siRNAs used to target the 126 human and mouse TLR pathway genes.** File includes gene symbols and gene IDs with corresponding siRNA plate locations, vendor ID, and sequence information. Separate spreadsheets are included for the human and mouse siRNAs.

**Table S2. siRNA z-scores from screens of the 126 human and mouse TLR pathway genes.** File includes gene symbols and gene IDs with both median and individual siRNA scores for each TLR ligand and readout tested. Separate spreadsheets are included for the human and mouse screens. Individual siRNA scores are means from replicate screening experiments (see Materials and Methods for details).

**Table S3. Ranking scores of human and mouse TLR pathway genes from the siRNA screens.** For each TLR ligand and readout tested, the 126 TLR pathway genes were sorted by their median z-score and assigned ranks from 1 (lowest score) to 126 (highest score) for each ligand-readout combination. For each readout (human TNF- $\alpha$ , mouse NF- $\kappa$ B, and mouse TNF- $\alpha$ ), the gene ranks were summed across all ligands tested to obtain the “Species-rank-‘readout’-SUM” value. Genes were sorted by these SUM values to obtain ranks from 1 to 126 representing the greatest-to-least perturbation of signal across the TLR ligands for each of the human TNF- $\alpha$ , mouse NF- $\kappa$ B, and mouse TNF- $\alpha$  readouts.

**Table S4. Human vs. mouse z-score differences across matched TLR ligands and assay readouts.** File includes gene symbols and gene IDs with median siRNA scores for the LPS, P3C, and R848 ligands tested with both the human and mouse TNF- $\alpha$  assay readouts. The average z-score difference between human and mouse shows lower values (green) for genes with stronger effects on the human TLR pathways and higher values (red) for genes with stronger effects on the mouse TLR pathways.
