# Supplementary material
Source: PubMed Central journal article supplement (PMC5381726)
Supplement: NIHMS854730-supplement-Supp_Tables_S1-S4.pdf [file NIHMS854730-supplement-Supp_Tables_S1-S4.pdf]

| TABLE S1 (HUMAN siRNA) |       |                |          |             |         |        |            |                             |                                 |                              |
|------------------------|-------|----------------|----------|-------------|---------|--------|------------|-----------------------------|---------------------------------|------------------------------|
| Gene#                  | Name  | Plate Name     | Location | Gene Symbol | Gene ID | siRNA# | siRNA ID   | Ambion Sense siRNA Sequence | Ambion Antisense siRNA Sequence | Qiagen siRNA target sequence |
| 1                      | TLR1  | Ambion_Plate 1 | C3       | TLR1        | 7096    | siRNA1 | s14191     | GGCAUACAACUGUAUGGUAtt       | UACCAUACAGUUGUAUGCCaa           |                              |
| 1                      | TLR1  | Ambion_Plate 1 | G8       | TLR1        | 7096    | siRNA2 | s14192     | CCAGUAUCUUGAUACAGUtt        | ACUGAUUCAAGAUACUGGat            |                              |
| 1                      | TLR1  | Ambion_Plate 1 | K16      | TLR1        | 7096    | siRNA3 | s14193     | CAUCCAAAUUAGCCCGUtt         | AACGGGCUAUUUUGGAUGgg            |                              |
| 1                      | TLR1  | Qiagen_Plate 1 | C3       | TLR1        | 7096    | siRNA4 | SI03098088 |                             |                                 | CTGGCGAAACTTCAAACAAAT        |
| 1                      | TLR1  | Qiagen_Plate 1 | G8       | TLR1        | 7096    | siRNA5 | SI03093545 |                             |                                 | CTGAGGGCCTTCAAGACTTTA        |
| 1                      | TLR1  | Qiagen_Plate 1 | K16      | TLR1        | 7096    | siRNA6 | SI03027360 |                             |                                 | AACAATCTTAATATATCGCA         |
| 2                      | TLR2  | Ambion_Plate 1 | D3       | TLR2        | 7097    | siRNA1 | s168       | GCCUUGACCGUCCAACAAtt        | UUGUUGGACAGGUAAGGctt            |                              |
| 2                      | TLR2  | Ambion_Plate 1 | H8       | TLR2        | 7097    | siRNA2 | s169       | GACUUAUCCUAUAAUUAUAtt       | AGUAAUUUAGGUAUAGUCta            |                              |
| 2                      | TLR2  | Ambion_Plate 1 | L16      | TLR2        | 7097    | siRNA3 | s170       | GGAUACCCUACAUAUGCAAtt       | UUGCUAAUUGAGGUAUCCtg            |                              |
| 2                      | TLR2  | Qiagen_Plate 1 | D3       | TLR2        | 7097    | siRNA4 | SI00050036 |                             |                                 | CCGCAACTCAAAGAACTTTAT        |
| 2                      | TLR2  | Qiagen_Plate 1 | H8       | TLR2        | 7097    | siRNA5 | SI00050029 |                             |                                 | AACATTTAGACTTATCTCTATA       |
| 2                      | TLR2  | Qiagen_Plate 1 | L16      | TLR2        | 7097    | siRNA6 | SI00050022 |                             |                                 | CAGGTAAGTGGAAACGTTAA         |
| 3                      | TLR3  | Ambion_Plate 1 | E3       | TLR3        | 7098    | siRNA1 | s235       | GGUAGGUGCCUUUCGUAAtt        | UGACGAAAGGCCUUAUCCgt            |                              |
| 3                      | TLR3  | Ambion_Plate 1 | I8       | TLR3        | 7098    | siRNA2 | s236       | CCGAUGAUCUACCCACAAtt        | UUUGUGGGUAGAUCAUCGGgt           |                              |
| 3                      | TLR3  | Ambion_Plate 1 | M16      | TLR3        | 7098    | siRNA3 | s234       | CAACGACUGAUGCCCGAAtt        | UUCGGAGCAUCAGUCGUUGaa           |                              |
| 3                      | TLR3  | Qiagen_Plate 1 | E3       | TLR3        | 7098    | siRNA4 | SI02655156 |                             |                                 | AAGAACTGGATATCTTGGCCA        |
| 3                      | TLR3  | Qiagen_Plate 1 | I8       | TLR3        | 7098    | siRNA5 | SI02630782 |                             |                                 | CACATAGACTGTCTCATAAA         |
| 3                      | TLR3  | Qiagen_Plate 1 | M16      | TLR3        | 7098    | siRNA6 | SI02630775 |                             |                                 | CAGCACAATGAGCTATCTCAA        |
| 4                      | TLR4  | Ambion_Plate 1 | F3       | TLR4        | 7099    | siRNA1 | s14194     | GAGCCGUGGUGUAUCUUtt         | AAAGAUACACCAGCGGCUctg           |                              |
| 4                      | TLR4  | Ambion_Plate 1 | J8       | TLR4        | 7099    | siRNA2 | s14195     | CAUUGAAGAAUUCGUAUtt         | UAAUCGGAAUUCUCAAUggt            |                              |
| 4                      | TLR4  | Ambion_Plate 1 | N16      | TLR4        | 7099    | siRNA3 | s14196     | CUAGAGCACUUGGACCUUtt        | AAAGGUCCAAGUCUCUAGat            |                              |
| 4                      | TLR4  | Qiagen_Plate 1 | F3       | TLR4        | 7099    | siRNA4 | SI04951149 |                             |                                 | ACCATTGAAGAATCCGATTA         |
| 4                      | TLR4  | Qiagen_Plate 1 | J8       | TLR4        | 7099    | siRNA5 | SI04951142 |                             |                                 | AAGAGGGTACTCTCATGTTA         |
| 4                      | TLR4  | Qiagen_Plate 1 | N16      | TLR4        | 7099    | siRNA6 | SI04951135 |                             |                                 | AACCCGGAGCCATTATGCTA         |
| 5                      | TLR5  | Ambion_Plate 1 | G3       | TLR5        | 7100    | siRNA1 | s14197     | GAAUAGCCUUUAUUCGUtt         | AAACGAUAAAAGCCUUAUCCgg          |                              |
| 5                      | TLR5  | Ambion_Plate 1 | K8       | TLR5        | 7100    | siRNA2 | s14198     | CACGGAAGGUUGUGAUAAtt        | UUCAUCACAACCUUCCGUGga           |                              |
| 5                      | TLR5  | Ambion_Plate 1 | C17      | TLR5        | 7100    | siRNA3 | s14199     | CCAUCUGUUUUAUUAUAGtt        | UCUAAAGUCAAACAGAUGGaa           |                              |
| 5                      | TLR5  | Qiagen_Plate 1 | G3       | TLR5        | 7100    | siRNA4 | SI02655163 |                             |                                 | AATAGCTTGTATAGCAGATC         |
| 5                      | TLR5  | Qiagen_Plate 1 | K8       | TLR5        | 7100    | siRNA5 | SI03026534 |                             |                                 | AAAGATCAACTTACAGCGAA         |
| 5                      | TLR5  | Qiagen_Plate 1 | C17      | TLR5        | 7100    | siRNA6 | SI02630810 |                             |                                 | GAGGGACTTTCTCATCTCAA         |
| 6                      | TLR6  | Ambion_Plate 1 | H3       | TLR6        | 10333   | siRNA1 | s20215     | CCAGAAUCCAGUUCUCCGAtt       | UCGGAGAACUGGAUUCUGgtt           |                              |
| 6                      | TLR6  | Ambion_Plate 1 | L8       | TLR6        | 10333   | siRNA2 | s20216     | GCAACUUAUCACAACUGAAtt       | UUAGUUGUGUAAGUUGCca             |                              |
| 6                      | TLR6  | Ambion_Plate 1 | D17      | TLR6        | 10333   | siRNA3 | s20217     | GGUGCUUAACAUCAGUAAtt        | UUAGUCAGUUGUAAGCACctt           |                              |
| 6                      | TLR6  | Qiagen_Plate 1 | H3       | TLR6        | 10333   | siRNA4 | SI03112011 |                             |                                 | TAGGGTCTTACAACACTGACTA       |
| 6                      | TLR6  | Qiagen_Plate 1 | L8       | TLR6        | 10333   | siRNA5 | SI03052658 |                             |                                 | CAAGTAGTCTCATGACGAA          |
| 6                      | TLR6  | Qiagen_Plate 1 | D17      | TLR6        | 10333   | siRNA6 | SI02636592 |                             |                                 | CTCACTGCATCTAAGTTATA         |
| 7                      | TLR7  | Ambion_Plate 1 | I3       | TLR7        | 51284   | siRNA1 | s27842     | GGAAUUAUCAUUAUGCUAAtt       | UUAGCAUUAUGAGUAAUUCctt          |                              |
| 7                      | TLR7  | Ambion_Plate 1 | M8       | TLR7        | 51284   | siRNA2 | s27843     | CCAUAUACCAUAUCCAGAtt        | UCUUGUAUUGUGUUAUUGGtg           |                              |
| 7                      | TLR7  | Ambion_Plate 1 | E17      | TLR7        | 51284   | siRNA3 | s27844     | GAGCAUACAGCUUAGCAAtt        | UUUGCUAAGCUUAUGCUCtg            |                              |
| 7                      | TLR7  | Qiagen_Plate 1 | I3       | TLR7        | 51284   | siRNA4 | SI03107447 |                             |                                 | TAACCTCTCGCCATTACATAA        |
| 7                      | TLR7  | Qiagen_Plate 1 | M8       | TLR7        | 51284   | siRNA5 | SI03097283 |                             |                                 | CTGGAGGTATTCCACGAACA         |
| 7                      | TLR7  | Qiagen_Plate 1 | E17      | TLR7        | 51284   | siRNA6 | SI02642416 |                             |                                 | ATGGTATGCTCCAAATCTAA         |
| 8                      | TLR8  | Ambion_Plate 1 | J3       | TLR8        | 51311   | siRNA1 | s27920     | GACCAACUUCGAUACCUAtt        | UAGGUUAUCGAAGUUGGGUcAA          |                              |
| 8                      | TLR8  | Ambion_Plate 1 | N8       | TLR8        | 51311   | siRNA2 | s27921     | GGAUUUGAAUUAACUUAUtt        | AUAGUUGAAUUAAGAUCCag            |                              |
| 8                      | TLR8  | Ambion_Plate 1 | F17      | TLR8        | 51311   | siRNA3 | s27922     | GGCUGCAAAUUCUCUAAtt         | UUAGUGAGAUUUUGCAGCCct           |                              |
| 8                      | TLR8  | Qiagen_Plate 1 | J3       | TLR8        | 51311   | siRNA4 | SI03062864 |                             |                                 | CAGAACGGAATCCCGGTATA         |
| 8                      | TLR8  | Qiagen_Plate 1 | N8       | TLR8        | 51311   | siRNA5 | SI02642458 |                             |                                 | CAAGTGTAAAGTGAACCTGAA        |
| 8                      | TLR8  | Qiagen_Plate 1 | F17      | TLR8        | 51311   | siRNA6 | SI02642451 |                             |                                 | TCGCGCATAATAAAGATGCA         |
| 9                      | TLR9  | Ambion_Plate 1 | K3       | TLR9        | 54106   | siRNA1 | s28872     | CUGGAAGAGCUAAACCUGAtt       | UCAGGUUUAGCUUCCAGgg             |                              |
| 9                      | TLR9  | Ambion_Plate 1 | C9       | TLR9        | 54106   | siRNA2 | s28873     | ACAUAUAGCUGGACCUUAAtt       | UAGAGGUCCAGCUUUAUUGgg           |                              |
| 9                      | TLR9  | Ambion_Plate 1 | G17      | TLR9        | 54106   | siRNA3 | s28874     | CUGUCUUAUUAUUAUUAAtt        | UUUGGUAAUUGAAGGACAggt           |                              |
| 9                      | TLR9  | Qiagen_Plate 1 | K3       | TLR9        | 54106   | siRNA4 | SI03118612 |                             |                                 | TGCTTCGTGGTCTTCGACAA         |
| 9                      | TLR9  | Qiagen_Plate 1 | C9       | TLR9        | 54106   | siRNA5 | SI03108504 |                             |                                 | TACCACATCTGATGCTAGA          |
| 9                      | TLR9  | Qiagen_Plate 1 | G17      | TLR9        | 54106   | siRNA6 | SI02642612 |                             |                                 | CACTCAATAAATGCTACCGAA        |
| 10                     | LBP   | Ambion_Plate 1 | L3       | LBP         | 3929    | siRNA1 | s8097      | CGACAUAUUAUUAUGCUUAtt       | UAAGCUAAUUAUUAUUGCGc            |                              |
| 10                     | LBP   | Ambion_Plate 1 | D9       | LBP         | 3929    | siRNA2 | s8098      | GGUAAAAGUGGAACUGAAAtt       | UUUCAGUUCACUUAUUAACctt          |                              |
| 10                     | LBP   | Ambion_Plate 1 | H17      | LBP         | 3929    | siRNA3 | s8099      | CGCUGACUUAUUAUUAUUAAtt      | UCGGAAUUAUUAUUAUUAAGCGgg        |                              |
| 10                     | LBP   | Qiagen_Plate 1 | L3       | LBP         | 3929    | siRNA4 | SI03058160 |                             |                                 | CACCGACAAGGGACTGCAGTA        |
| 10                     | LBP   | Qiagen_Plate 1 | D9       | LBP         | 3929    | siRNA5 | SI00060200 |                             |                                 | CAAGATCACTGGGTTCTGAA         |
| 10                     | LBP   | Qiagen_Plate 1 | H17      | LBP         | 3929    | siRNA6 | SI00060186 |                             |                                 | CCGCTGACTCTAATATCCGA         |
| 11                     | MD2   | Ambion_Plate 1 | M3       | LY96        | 23643   | siRNA1 | s24262     | GAAUCUCCAAGCGCAAAtt         | UUUGCGCUUUGGAAGAUUCat           |                              |
| 11                     | MD2   | Ambion_Plate 1 | E9       | LY96        | 23643   | siRNA2 | s24263     | AGAAGUUAUUAUUGCCGAGGAtt     | UCCUCGGCAAUAUUAUUCUtt           |                              |
| 11                     | MD2   | Ambion_Plate 1 | I17      | LY96        | 23643   | siRNA3 | s24264     | CUACUGUGAUAAAUGCAAtt        | UUUGCAUUUAUUAUUAUUAUUAgt        |                              |
| 11                     | MD2   | Qiagen_Plate 1 | M3       | LY96        | 23643   | siRNA4 | SI03246446 |                             |                                 | AACAATATCATTCTCTCTCAA        |
| 11                     | MD2   | Qiagen_Plate 1 | E9       | LY96        | 23643   | siRNA5 | SI04322556 |                             |                                 | TGCTTGGAGTTTGTCTCTA          |
| 11                     | MD2   | Qiagen_Plate 1 | I17      | LY96        | 23643   | siRNA6 | SI04219684 |                             |                                 | TTGAGATATTGAATCATGTT         |
| 12                     | CD14  | Ambion_Plate 1 | N3       | CD14        | 929     | siRNA1 | s2600      | ACCUGACACUGGACGGGAAtt       | UUCCCGUCCAGUGUCAGGUta           |                              |
| 12                     | CD14  | Ambion_Plate 1 | F9       | CD14        | 929     | siRNA2 | s2601      | CGUCUGCAACUUCUCCGAAtt       | UUCGGAGAAGUUGCAGACGca           |                              |
| 12                     | CD14  | Ambion_Plate 1 | J17      | CD14        | 929     | siRNA3 | s2602      | ACCUAGAGCCGUUUCUAAAAtt      | UUUAGAAACGGUCUUAUGGUtg          |                              |
| 12                     | CD14  | Qiagen_Plate 1 | N3       | CD14        | 929     | siRNA4 | SI02623852 |                             |                                 | CTCAGAGGTTGCGAAGACTTA        |
| 12                     | CD14  | Qiagen_Plate 1 | F9       | CD14        | 929     | siRNA5 | SI02623845 |                             |                                 | CAGCTAGACCTGTCTGACAA         |
| 12                     | CD14  | Qiagen_Plate 1 | J17      | CD14        | 929     | siRNA6 | SI00012404 |                             |                                 | CCCGAGGTGGATAACTGACA         |
| 13                     | CD11b | Ambion_Plate 1 | C4       | ITGAM       | 3684    | siRNA1 | s7565      | GGGUCAUCGAGCAUAAUAtt        | UAUUAUGCUGCAUGACCCga            |                              |
| 13                     | CD11b | Ambion_Plate 1 | G9       | ITGAM       | 3684    | siRNA2 | s7566      | GAACAACCUAACCAAGAtt         | UCUUGGGUUAGGGUUGUUCtg           |                              |
| 13                     | CD11b | Ambion_Plate 1 | K17      | ITGAM       | 3684    | siRNA3 | s7567      | CUUGGACACUGAAAACGCAAtt      | UGCGUUUUUUAUGUUAACggt           |                              |
| 13                     | CD11b | Qiagen_Plate 1 | C4       | ITGAM       | 3684    | siRNA4 | SI03118430 |                             |                                 | TGCCGCCATCATCTTACGGAA        |
| 13                     | CD11b | Qiagen_Plate 1 | G9       | ITGAM       | 3684    | siRNA5 | SI00013223 |                             |                                 | TCAGACATCGGTTTCAATTTAA       |
| 13                     | CD11b | Qiagen_Plate 1 | K17      | ITGAM       | 3684    | siRNA6 | SI00013216 |                             |                                 | TCGGGTGATGAGCATCAATA         |

| TABLE S1 (HUMAN siRNA) |         |                |          |             |         |        |            |                             |                                 |                              |
|------------------------|---------|----------------|----------|-------------|---------|--------|------------|-----------------------------|---------------------------------|------------------------------|
| Gene#                  | Name    | Plate Name     | Location | Gene Symbol | Gene ID | siRNA# | siRNA ID   | Ambion Sense siRNA Sequence | Ambion Antisense siRNA Sequence | Qiagen siRNA target sequence |
| 14                     | CD11c   | Ambion_Plate 1 | D4       | ITGAX       | 3687    | siRNA1 | s7571      | UCAUCACAGCGGUACUGUAtt       | UACAGUACCCGUCUGAUGAgT           |                              |
| 14                     | CD11c   | Ambion_Plate 1 | H9       | ITGAX       | 3687    | siRNA2 | s7572      | AGUCCAACAUCUGCCUUUAtt       | UAAAGGCAGAUUUUGGACUgt           |                              |
| 14                     | CD11c   | Ambion_Plate 1 | L17      | ITGAX       | 3687    | siRNA3 | s7573      | ACAGAUACCAGGUCAAUAAtt       | UUUUUGACCGGUUAUCUGUgc           |                              |
| 14                     | CD11c   | Qiagen_Plate 1 | D4       | ITGAX       | 3687    | siRNA4 | SI0310058  |                             |                                 | TACGTGGCAGAGGGCCAGAAA        |
| 14                     | CD11c   | Qiagen_Plate 1 | H9       | ITGAX       | 3687    | siRNA5 | SI03084053 |                             |                                 | CGCAGAAAGTATGGTGTGGAA        |
| 14                     | CD11c   | Qiagen_Plate 1 | L17      | ITGAX       | 3687    | siRNA6 | SI03066126 |                             |                                 | CAGCCACGAACAATTCACCAA        |
| 15                     | ARF6    | Ambion_Plate 1 | E4       | ARF6        | 382     | siRNA1 | s1565      | GUCUCAUCUUCGUAGUGAtt        | UCCACUACGAAGUAGAGCct            |                              |
| 15                     | ARF6    | Ambion_Plate 1 | I9       | ARF6        | 382     | siRNA2 | s1566      | AGACGGUGACUUACAATAAtt       | UUUUUUGAAGUACCCGUCUcc           |                              |
| 15                     | ARF6    | Ambion_Plate 1 | M17      | ARF6        | 382     | siRNA3 | s1567      | CCAAGGUCUCAUCUUCGUAtt       | UACGAAGAUAGAGACCUUGGgt          |                              |
| 15                     | ARF6    | Qiagen_Plate 1 | E4       | ARF6        | 382     | siRNA4 | SI02757286 |                             |                                 | CAACGTGGAGACGGTGACTTA        |
| 15                     | ARF6    | Qiagen_Plate 1 | I9       | ARF6        | 382     | siRNA5 | SI04335793 |                             |                                 | ITTGACAGTATTGGCTCTCA         |
| 15                     | ARF6    | Qiagen_Plate 1 | M17      | ARF6        | 382     | siRNA6 | SI04308619 |                             |                                 | CTGGTGATATCCAGATCTTAA        |
| 16                     | MyD88   | Ambion_Plate 1 | F4       | MYD88       | 4615    | siRNA1 | s9136      | CUAGUGAGCUCAUCGAAAAtt       | UUUUUGAUGAGUCACUAGca            |                              |
| 16                     | MyD88   | Ambion_Plate 1 | J9       | MYD88       | 4615    | siRNA2 | s9137      | CGGCAACUGGAACAGACAAtt       | UUUGUCUUGUCCAGUUGCCGga          |                              |
| 16                     | MyD88   | Ambion_Plate 1 | N17      | MYD88       | 4615    | siRNA3 | s9138      | CAGACAAAUAUCGACUGAtt        | UCAGUCGAUAGUUUGUCUgtt           |                              |
| 16                     | MyD88   | Qiagen_Plate 1 | F4       | MYD88       | 4615    | siRNA4 | SI05426057 |                             |                                 | CAGGACCAGCTGAGACTAAGA        |
| 16                     | MyD88   | Qiagen_Plate 1 | J9       | MYD88       | 4615    | siRNA5 | SI03100902 |                             |                                 | CTTGATTGCTTACAAAGTTA         |
| 16                     | MyD88   | Qiagen_Plate 1 | N17      | MYD88       | 4615    | siRNA6 | SI02628661 |                             |                                 | CTCTGGCATATTATCAAGTA         |
| 17                     | Mal     | Ambion_Plate 1 | G4       | TIRAP       | 114609  | siRNA1 | s41563     | GCUUUUCGUCAAGUCAAAGAtt      | UCUUUGACUUGACGAAAGCca           |                              |
| 17                     | Mal     | Ambion_Plate 1 | K9       | TIRAP       | 114609  | siRNA2 | s195607    | CCUCCAGCGAUGCUUCACAtt       | UGUGAAGCAUCGUCUGGAGtg           |                              |
| 17                     | Mal     | Ambion_Plate 1 | C18      | TIRAP       | 114609  | siRNA3 | s195608    | GCGCUAUAGUUGCCGAGCAtt       | AGCUCGGACACUAUAGCGCcg           |                              |
| 17                     | Mal     | Qiagen_Plate 1 | G4       | TIRAP       | 114609  | siRNA4 | SI03108308 |                             |                                 | TACATAGGAAGTCTTCTAAA         |
| 17                     | Mal     | Qiagen_Plate 1 | K9       | TIRAP       | 114609  | siRNA5 | SI03075135 |                             |                                 | CCAGCGATGCTTACAGCCTA         |
| 17                     | Mal     | Qiagen_Plate 1 | C18      | TIRAP       | 114609  | siRNA6 | SI03037062 |                             |                                 | AAGTGTACTAGAACTACTACA        |
| 18                     | IRAK1   | Ambion_Plate 1 | H4       | IRAK1       | 3654    | siRNA1 | s322       | GGUUGUCCUUGAGUAAUAtt        | UUUUUACUACAGGACAACTcg           |                              |
| 18                     | IRAK1   | Ambion_Plate 1 | L9       | IRAK1       | 3654    | siRNA2 | s323       | CAAGUCAGGUUUCAUGUAAtt       | UUACAUAGAAACUGACUUGGct          |                              |
| 18                     | IRAK1   | Ambion_Plate 1 | D18      | IRAK1       | 3654    | siRNA3 | s324       | GGAAAAGACAUGUAUCACAtt       | UGUGAUACAUGUCUUUUCctt           |                              |
| 18                     | IRAK1   | Qiagen_Plate 1 | H4       | IRAK1       | 3654    | siRNA4 | SI00605262 |                             |                                 | CCGGGCAATTCAGTTCTACA         |
| 18                     | IRAK1   | Qiagen_Plate 1 | L9       | IRAK1       | 3654    | siRNA5 | SI03649429 |                             |                                 | CCAGGTGTCTTGTAGTAATA         |
| 18                     | IRAK1   | Qiagen_Plate 1 | D18      | IRAK1       | 3654    | siRNA6 | SI03099166 |                             |                                 | CTGGGTGATGTGCCCTTCTA         |
| 19                     | IRAK2   | Ambion_Plate 1 | I4       | IRAK2       | 3656    | siRNA1 | s1495      | CAGGAUCAAUCAAGAAUAtt        | AAUCUUUGCAUUGAUCCUGga           |                              |
| 19                     | IRAK2   | Ambion_Plate 1 | M9       | IRAK2       | 3656    | siRNA2 | s7497      | AGUCCAGGAUCAUCAAAGAtt       | UUUCGAUUGAUCCUGGACUtg           |                              |
| 19                     | IRAK2   | Ambion_Plate 1 | E18      | IRAK2       | 3656    | siRNA3 | s7496      | CCUCCUACGUAUCACAGAtt        | UCUUGAUACGUAAGGAGGcg            |                              |
| 19                     | IRAK2   | Qiagen_Plate 1 | I4       | IRAK2       | 3656    | siRNA4 | SI00605283 |                             |                                 | CCAGATCATCTGAACGGAA          |
| 19                     | IRAK2   | Qiagen_Plate 1 | M9       | IRAK2       | 3656    | siRNA5 | SI00605276 |                             |                                 | CAGCAACGTCAGAGCTCTAA         |
| 19                     | IRAK2   | Qiagen_Plate 1 | E18      | IRAK2       | 3656    | siRNA6 | SI04435522 |                             |                                 | CACGGGCATCCCTGCAATGGA        |
| 20                     | IRAK4   | Ambion_Plate 1 | J4       | IRAK4       | 51135   | siRNA1 | s27527     | GGUUGACAUUACUACUGAAtt       | UUUAGUAGUAAUUGUACACat           |                              |
| 20                     | IRAK4   | Ambion_Plate 1 | N9       | IRAK4       | 51135   | siRNA2 | s27528     | GCCUAAUGGUUUCAUUGUAtt       | UAGCAAUGAACCAUUAAGGcat          |                              |
| 20                     | IRAK4   | Ambion_Plate 1 | F18      | IRAK4       | 51135   | siRNA3 | s27529     | GGUGUGGUUUUACUAGAAtt        | UUUCUAGUAAACCAACACca            |                              |
| 20                     | IRAK4   | Qiagen_Plate 1 | J4       | IRAK4       | 51135   | siRNA4 | SI02224705 |                             |                                 | TTGAGGACAGTGGTTATTAA         |
| 20                     | IRAK4   | Qiagen_Plate 1 | N9       | IRAK4       | 51135   | siRNA5 | SI02224698 |                             |                                 | ATCCTATTAGTATATATTTA         |
| 20                     | IRAK4   | Qiagen_Plate 1 | F18      | IRAK4       | 51135   | siRNA6 | SI00300566 |                             |                                 | AACACCGTGAACTCAGTTAT         |
| 21                     | Pellino | Ambion_Plate 1 | K4       | PELL1       | 57162   | siRNA1 | s32811     | GGUUUUUAGUCGACGGAUAtt       | AAUCCUGCAGCAUAAAUCcgT           |                              |
| 21                     | Pellino | Ambion_Plate 1 | C10      | PELL1       | 57162   | siRNA2 | s32812     | CAAAGACCAGCAUAGCAUAtt       | UAUGCUAUUGCUGGUUUUgtt           |                              |
| 21                     | Pellino | Ambion_Plate 1 | G18      | PELL1       | 57162   | siRNA3 | s32813     | GCAUUUCCUAGUAUGAAGAtt       | UCUUCUAUCUAGGAAUUGctA           |                              |
| 21                     | Pellino | Qiagen_Plate 1 | K4       | PELL1       | 57162   | siRNA4 | SI04908953 |                             |                                 | CAGAATCATATGTGAACGGAA        |
| 21                     | Pellino | Qiagen_Plate 1 | C10      | PELL1       | 57162   | siRNA5 | SI04297573 |                             |                                 | CTGGTGAAACAGGCTACATCA        |
| 21                     | Pellino | Qiagen_Plate 1 | G18      | PELL1       | 57162   | siRNA6 | SI04284665 |                             |                                 | CAGTTACAAGATGGCTCGTTA        |
| 22                     | Uev1a   | Ambion_Plate 1 | L4       | UBE2V1      | 7335    | siRNA1 | s14598     | AGUAAAUAGUUCUAAUGAtt        | UCCAUUAGAACUAAUUUACucc          |                              |
| 22                     | Uev1a   | Ambion_Plate 1 | D10      | UBE2V1      | 7335    | siRNA2 | s14599     | GAUUUCAUUAUGCAUCAAAtt       | UUUGAUGCUUAUAGAAUUCtg           |                              |
| 22                     | Uev1a   | Ambion_Plate 1 | H18      | UBE2V1      | 7335    | siRNA3 | s14600     | UGGAGUAAUAGUUCUAAUAtt       | AUUAGAACUAAUUUACUCCatt          |                              |
| 22                     | Uev1a   | Qiagen_Plate 1 | L4       | UBE2V1      | 7335    | siRNA4 | SI04951254 |                             |                                 | CAGCAACTATCAAGTCTGAAA        |
| 22                     | Uev1a   | Qiagen_Plate 1 | D10      | UBE2V1      | 7335    | siRNA5 | SI04951247 |                             |                                 | ACCACTGTCCAGCTAGTTGAA        |
| 22                     | Uev1a   | Qiagen_Plate 1 | H18      | UBE2V1      | 7335    | siRNA6 | SI04951240 |                             |                                 | TGGCCGAAGCATAGATTGTAA        |
| 23                     | Ubc13   | Ambion_Plate 1 | M4       | UBE2N       | 7334    | siRNA1 | s14595     | GCAUCAGAUUCGACCUUUAtt       | AAAGGUCAGAUACUAGUGCct           |                              |
| 23                     | Ubc13   | Ambion_Plate 1 | E10      | UBE2N       | 7334    | siRNA2 | s14596     | CUUGAUUGUUGAACCAAAAtt       | UUUGGUUCCAACAUAAGGct            |                              |
| 23                     | Ubc13   | Ambion_Plate 1 | I18      | UBE2N       | 7334    | siRNA3 | s14597     | GGAAGAAUAGUUUAGAUAtt        | UAUCUAAACAUAUUUUCUCCca          |                              |
| 23                     | Ubc13   | Qiagen_Plate 1 | M4       | UBE2N       | 7334    | siRNA4 | SI03114027 |                             |                                 | TCCCAATTTGACAATCGTATT        |
| 23                     | Ubc13   | Qiagen_Plate 1 | E10      | UBE2N       | 7334    | siRNA5 | SI03097983 |                             |                                 | CTGGCCCTGAGCATGCATAAA        |
| 23                     | Ubc13   | Qiagen_Plate 1 | I18      | UBE2N       | 7334    | siRNA6 | SI03032176 |                             |                                 | AAGATAGTACTGAATGGAGTA        |
| 24                     | TRAF6   | Ambion_Plate 1 | N4       | TRAF6       | 7189    | siRNA1 | s14389     | GCCUAAUCAUUAUGAUCAUAtt      | UAGAUCAUAAUAGUUAAGGcat          |                              |
| 24                     | TRAF6   | Ambion_Plate 1 | F10      | TRAF6       | 7189    | siRNA2 | s14388     | GAAGGUUGUUUGCACAAGAtt       | UCUUGUGCAAAACAACUUCat           |                              |
| 24                     | TRAF6   | Ambion_Plate 1 | J18      | TRAF6       | 7189    | siRNA3 | s14390     | GGAACUAUUCACCAGUUAAtt       | UAACUGGUGAAUAGUUUCCtg           |                              |
| 24                     | TRAF6   | Qiagen_Plate 1 | N4       | TRAF6       | 7189    | siRNA4 | SI0350145  |                             |                                 | ATGCGCTTGACCTTCAGTTA         |
| 24                     | TRAF6   | Qiagen_Plate 1 | F10      | TRAF6       | 7189    | siRNA5 | SI03046043 |                             |                                 | AGGGTACAATACGCTTACAA         |
| 24                     | TRAF6   | Qiagen_Plate 1 | J18      | TRAF6       | 7189    | siRNA6 | SI00066122 |                             |                                 | CAGCGCTGTGCAAACTATATA        |
| 25                     | TRAF3   | Ambion_Plate 1 | C5       | TRAF3       | 7187    | siRNA1 | s14382     | CGCUAAAGCUGCACAGUAtt        | UCAGUGGUCAGUUUAGCGgc            |                              |
| 25                     | TRAF3   | Ambion_Plate 1 | G10      | TRAF3       | 7187    | siRNA2 | s14383     | GGUAAUUGCUGCAAGAGAtt        | UCUCUUGCAGCAUUAUUCctt           |                              |
| 25                     | TRAF3   | Ambion_Plate 1 | K18      | TRAF3       | 7187    | siRNA3 | s14384     | GAGAGCAUCGUAAAGAUAtt        | UAUCUUUAAACGAUCUCUctt           |                              |
| 25                     | TRAF3   | Qiagen_Plate 1 | C5       | TRAF3       | 7187    | siRNA4 | SI02225629 |                             |                                 | TCCGATGATCGCGCTGCAGAA        |
| 25                     | TRAF3   | Qiagen_Plate 1 | G10      | TRAF3       | 7187    | siRNA5 | SI02225622 |                             |                                 | AGAGAGCATCGTTAAAGATA         |
| 25                     | TRAF3   | Qiagen_Plate 1 | K18      | TRAF3       | 7187    | siRNA6 | SI03035508 |                             |                                 | AAGGCGTGTAAATACCGGGAA        |
| 26                     | TAK1    | Ambion_Plate 1 | D5       | MAP3K7      | 6885    | siRNA1 | s13766     | CGUGUGAACCAUCCUAAUAtt       | UAUUAGGAUGGUUACACCGgg           |                              |
| 26                     | TAK1    | Ambion_Plate 1 | H10      | MAP3K7      | 6885    | siRNA2 | s13767     | AGAUACAAUUGGAUCAGUAtt       | AUCUGAUCCAUUGGUUUUgt            |                              |
| 26                     | TAK1    | Ambion_Plate 1 | L18      | MAP3K7      | 6885    | siRNA3 | s13768     | GACUCGUUUUGGUUCAAAAtt       | UUUAGACCAACAACGAGUcat           |                              |
| 26                     | TAK1    | Qiagen_Plate 1 | D5       | MAP3K7      | 6885    | siRNA4 | SI02758763 |                             |                                 | AAGATGGTATATACCAAGTTA        |
| 26                     | TAK1    | Qiagen_Plate 1 | H10      | MAP3K7      | 6885    | siRNA5 | SI02758756 |                             |                                 | AACGGACAGCAAGAGCTAGA         |
| 26                     | TAK1    | Qiagen_Plate 1 | L18      | MAP3K7      | 6885    | siRNA6 | SI02758749 |                             |                                 | AAGACTTGACTGTAACGGAA         |

| TABLE S1 (HUMAN siRNA) |       |                |          |             |         |        |            |                             |                                 |                              |
|------------------------|-------|----------------|----------|-------------|---------|--------|------------|-----------------------------|---------------------------------|------------------------------|
| Gene#                  | Name  | Plate Name     | Location | Gene Symbol | Gene ID | siRNA# | siRNA ID   | Ambion Sense siRNA Sequence | Ambion Antisense siRNA Sequence | Qiagen siRNA target sequence |
| 27                     | TAB1  | Ambion_Plate 1 | E5       | TAB1        | 10454   | siRNA1 | s20451     | CGUGCACUUUUUUGCAAUUt        | AUUUGCAUAAAAGUGCACGgt           |                              |
| 27                     | TAB1  | Ambion_Plate 1 | I10      | TAB1        | 10454   | siRNA2 | s20452     | CUGCGAUGAUUGACACUGAt        | UCAGUGUCAUUAUCGCAGca            |                              |
| 27                     | TAB1  | Ambion_Plate 1 | M18      | TAB1        | 10454   | siRNA3 | s20453     | CGGUCCUUCUCAACAACAAt        | UUGUUUUUGAGAAGGACCGcc           |                              |
| 27                     | TAB1  | Qiagen_Plate 1 | E5       | TAB1        | 10454   | siRNA4 | SI02758903 |                             |                                 | AACGGCTATGATGGCAACCGA        |
| 27                     | TAB1  | Qiagen_Plate 1 | I10      | TAB1        | 10454   | siRNA5 | SI02660329 |                             |                                 | ACGCCTTGGCTGAGAAAGCAA        |
| 27                     | TAB1  | Qiagen_Plate 1 | M18      | TAB1        | 10454   | siRNA6 | SI04952325 |                             |                                 | CAGCTACTCTGCTGATGGCAA        |
| 28                     | TAB2  | Ambion_Plate 1 | F5       | TAB2        | 23118   | siRNA1 | s23073     | GAAUAAGUGAAACACGGAAt        | UUCGGUUGUUCACUUUUCta            |                              |
| 28                     | TAB2  | Ambion_Plate 1 | J10      | TAB2        | 23118   | siRNA2 | s23075     | GUCGAGCAUAGGCAUAAt          | UUUUAUUGCCUUAUUGCUCGAt          |                              |
| 28                     | TAB2  | Ambion_Plate 1 | N18      | TAB2        | 23118   | siRNA3 | s23074     | GGUUUUAACUGACCCUGGAt        | UCGCAGGUCAUGUAAAACctg           |                              |
| 28                     | TAB2  | Qiagen_Plate 1 | F5       | TAB2        | 23118   | siRNA4 | SI02224642 |                             |                                 | TGGCTGGGTATCTCACTTTAA        |
| 28                     | TAB2  | Qiagen_Plate 1 | J10      | TAB2        | 23118   | siRNA5 | SI02224635 |                             |                                 | CAGTCAATAGCCAGACCTTAA        |
| 28                     | TAB2  | Qiagen_Plate 1 | N18      | TAB2        | 23118   | siRNA6 | SI03107685 |                             |                                 | TAAGTCTATATTTCAGCGAA         |
| 29                     | TAB3  | Ambion_Plate 1 | G5       | TAB3        | 257397  | siRNA1 | s48890     | GACAAUAGGAUUAUAGAAt         | UUCUUAUUAUCUUUUGUCat            |                              |
| 29                     | TAB3  | Ambion_Plate 1 | K10      | TAB3        | 257397  | siRNA2 | s48891     | GCUGAUUUGUUUAGUUAAt         | UUGAACUAAACUAUUCAGCtg           |                              |
| 29                     | TAB3  | Ambion_Plate 1 | C19      | TAB3        | 257397  | siRNA3 | s48892     | GGAAUACCAUAGUCCAGAAt        | AUCUGGACUUAUGGUUUUCCat          |                              |
| 29                     | TAB3  | Qiagen_Plate 1 | G5       | TAB3        | 257397  | siRNA4 | SI02779504 |                             |                                 | CTCGGTATAGTACAAATCCAA        |
| 29                     | TAB3  | Qiagen_Plate 1 | K10      | TAB3        | 257397  | siRNA5 | SI03111248 |                             |                                 | TAGCGTGACCTCAAAGTACA         |
| 29                     | TAB3  | Qiagen_Plate 1 | C19      | TAB3        | 257397  | siRNA6 | SI00738332 |                             |                                 | CCGTTTAACATCCATTTCTA         |
| 30                     | NEMO  | Ambion_Plate 1 | H5       | IKBKG       | 8517    | siRNA1 | s16186     | AAACAGGAGGUGAUCGUAAt        | UAUCGAUACCUCUUGUUUgg            |                              |
| 30                     | NEMO  | Ambion_Plate 1 | L10      | IKBKG       | 8517    | siRNA2 | s16187     | GGAUUGAGGACAUAGGGAAt        | UUCCUUAUGUCCUGCAUCCtg           |                              |
| 30                     | NEMO  | Ambion_Plate 1 | D19      | IKBKG       | 8517    | siRNA3 | s16188     | GAUUUGAUGGAGACCGUUAt        | AACGGUCUCCAUCACAAUctt           |                              |
| 30                     | NEMO  | Qiagen_Plate 1 | H5       | IKBKG       | 8517    | siRNA4 | SI04899174 |                             |                                 | CAGGATCGAGGACATGAGGAA        |
| 30                     | NEMO  | Qiagen_Plate 1 | L10      | IKBKG       | 8517    | siRNA5 | SI04437692 |                             |                                 | CTGCAGAGGGAGTACAGCAAA        |
| 30                     | NEMO  | Qiagen_Plate 1 | D19      | IKBKG       | 8517    | siRNA6 | SI04437685 |                             |                                 | TCGCTTGGAGGCTCCACTAA         |
| 31                     | IKKa  | Ambion_Plate 1 | J5       | CHUK        | 1147    | siRNA1 | s3076      | GGACUAAAAGAAGACUAUAt        | UAUAGUCUUUUUAGUCCag             |                              |
| 31                     | IKKa  | Ambion_Plate 1 | M10      | CHUK        | 1147    | siRNA2 | s3077      | GAAGGAUCCAAAGUUAUAt         | UAUACACUUUGGAUCCUctt            |                              |
| 31                     | IKKa  | Ambion_Plate 1 | E19      | CHUK        | 1147    | siRNA3 | s3078      | GCCUAGAGCUAAGUACAAAt        | UUGGUACUUAGCUCUAGGCga           |                              |
| 31                     | IKKa  | Qiagen_Plate 1 | J5       | CHUK        | 1147    | siRNA4 | SI02654659 |                             |                                 | AAGCAGAAGATTATTGATCTA        |
| 31                     | IKKa  | Qiagen_Plate 1 | M10      | CHUK        | 1147    | siRNA5 | SI00605122 |                             |                                 | TTCCATAAGCTTGGTGACAAA        |
| 31                     | IKKa  | Qiagen_Plate 1 | E19      | CHUK        | 1147    | siRNA6 | SI00605115 |                             |                                 | CAGGAGAAGTTGCGTTTAGTA        |
| 32                     | IKKb  | Ambion_Plate 1 | J5       | IKKKB       | 3551    | siRNA1 | s7263      | GGGCAGUUUUUGCACAUAt         | UGAUGUGCAAAGACUGCCctg           |                              |
| 32                     | IKKb  | Ambion_Plate 1 | N10      | IKKKB       | 3551    | siRNA2 | s7264      | GGACAUUUGUUUAGGCAAt         | UUUCGUAAACAAAUUGCCac            |                              |
| 32                     | IKKb  | Ambion_Plate 1 | F19      | IKKKB       | 3551    | siRNA3 | s7265      | GACUUGAAUGGACCGUGAt         | UCACCGUCCAUUCAAGUctt            |                              |
| 32                     | IKKb  | Qiagen_Plate 1 | J5       | IKKKB       | 3551    | siRNA4 | SI05460700 |                             |                                 | GTGGACATTGTTGTTAGCGAA        |
| 32                     | IKKb  | Qiagen_Plate 1 | N10      | IKKKB       | 3551    | siRNA5 | SI05460686 |                             |                                 | AAAGCTGGTTATATCTTGAA         |
| 32                     | IKKb  | Qiagen_Plate 1 | F19      | IKKKB       | 3551    | siRNA6 | SI02622725 |                             |                                 | CTGGATGACATCTTAACTTA         |
| 33                     | IKBa  | Ambion_Plate 1 | K5       | NFKBIA      | 4792    | siRNA1 | s9510      | GCACUGACCAUGGAAGUAt         | UCACUCCAUUGGUCAGUGCct           |                              |
| 33                     | IKBa  | Ambion_Plate 1 | C14      | NFKBIA      | 4792    | siRNA2 | s9511      | CAAGCACCCGGAUACAGCAt        | UGCUGUAUCCGGGUGCUUggg           |                              |
| 33                     | IKBa  | Ambion_Plate 1 | G19      | NFKBIA      | 4792    | siRNA3 | s9512      | AGUUCACCGAGUUCACAGAt        | UCUGGAACUCCGUGAUCUct            |                              |
| 33                     | IKBa  | Qiagen_Plate 1 | K5       | NFKBIA      | 4792    | siRNA4 | SI03114930 |                             |                                 | TCCGAGACTTTCAGGAAATA         |
| 33                     | IKBa  | Qiagen_Plate 1 | C14      | NFKBIA      | 4792    | siRNA5 | SI00126826 |                             |                                 | CAGCCGAAATGTCTGAGGCA         |
| 33                     | IKBa  | Qiagen_Plate 1 | G19      | NFKBIA      | 4792    | siRNA6 | SI00126819 |                             |                                 | CTGGGCCAGCTGACACTAGAA        |
| 34                     | IKBb  | Ambion_Plate 1 | L5       | NFKBIB      | 4793    | siRNA1 | s9513      | ACGACGACAUUUGGUUUAAt        | UGAACCACAAUUGUCUGCUat           |                              |
| 34                     | IKBb  | Ambion_Plate 1 | D14      | NFKBIB      | 4793    | siRNA2 | s194651    | UGAUUUUGUUUUAUUAAt          | UUAAACAUGAAACAAUACca            |                              |
| 34                     | IKBb  | Ambion_Plate 1 | H19      | NFKBIB      | 4793    | siRNA3 | s194652    | ACGUGGCCGUUAUCCACAAt        | UUGUGGAUAAAGCCACGUGg            |                              |
| 34                     | IKBb  | Qiagen_Plate 1 | L5       | NFKBIB      | 4793    | siRNA4 | SI04252241 |                             |                                 | CAGAATGACCTAGCCAGACA         |
| 34                     | IKBb  | Qiagen_Plate 1 | D14      | NFKBIB      | 4793    | siRNA5 | SI03140718 |                             |                                 | ACGCAGATGAATGTGTGACACA       |
| 34                     | IKBb  | Qiagen_Plate 1 | H19      | NFKBIB      | 4793    | siRNA6 | SI00658098 |                             |                                 | CCCAGGGCGAGGACGAGAAA         |
| 35                     | IKBe  | Ambion_Plate 1 | M5       | NFKBIE      | 4794    | siRNA1 | s9514      | AGGAAUCCUUUGUCCUUUAt        | AAAAGGACAAGGGAUUCCUca           |                              |
| 35                     | IKBe  | Ambion_Plate 1 | E14      | NFKBIE      | 4794    | siRNA2 | s9515      | GGCUGUACAUUCUGGACCAAt       | UUGGUCCAGAUUAACAGCgag           |                              |
| 35                     | IKBe  | Ambion_Plate 1 | I19      | NFKBIE      | 4794    | siRNA3 | s9516      | GGGCACAGUGUAAGACAAAt        | UGUCUUAACAUUGGUCGCCct           |                              |
| 35                     | IKBe  | Qiagen_Plate 1 | M5       | NFKBIE      | 4794    | siRNA4 | SI03085663 |                             |                                 | CAGGATGGAGCTGACATTGAT        |
| 35                     | IKBe  | Qiagen_Plate 1 | E14      | NFKBIE      | 4794    | siRNA5 | SI03058839 |                             |                                 | CACCGTGTGTTAAAGACTTCA        |
| 35                     | IKBe  | Qiagen_Plate 1 | I19      | NFKBIE      | 4794    | siRNA6 | SI00065149 |                             |                                 | CACCTGGCTGTGAAACCCAA         |
| 36                     | Nfkb1 | Ambion_Plate 1 | N5       | NFKB1       | 4790    | siRNA1 | s9504      | GGCUCAUGUUUACAGCUUAt        | AAAGCUGUAAAACUAGGCGgc           |                              |
| 36                     | Nfkb1 | Ambion_Plate 1 | F14      | NFKB1       | 4790    | siRNA2 | s9505      | CCACCUCAUUUCUACAUAAt        | AAGUUGAGAUAUAGGUGGat            |                              |
| 36                     | Nfkb1 | Ambion_Plate 1 | J19      | NFKB1       | 4790    | siRNA3 | s9506      | GCAGCUGUAUUAAGUUAUAAt       | UAGUAAUUUAUACAGCUGCag           |                              |
| 36                     | Nfkb1 | Qiagen_Plate 1 | N5       | NFKB1       | 4790    | siRNA4 | SI02662618 |                             |                                 | GACGCCATCTATGACAGTAAA        |
| 36                     | Nfkb1 | Qiagen_Plate 1 | F14      | NFKB1       | 4790    | siRNA5 | SI02662093 |                             |                                 | CTGGGTATACTTATGTGACA         |
| 36                     | Nfkb1 | Qiagen_Plate 1 | J19      | NFKB1       | 4790    | siRNA6 | SI02654939 |                             |                                 | TCAGTTGGTCACAAATGGAAA        |
| 37                     | Nfkb2 | Ambion_Plate 1 | C6       | NFKB2       | 4791    | siRNA1 | s9507      | GGUUCUAUAGGGAUGAUGAt        | UCAUCAUCCUUAUAGAACCga           |                              |
| 37                     | Nfkb2 | Ambion_Plate 1 | G14      | NFKB2       | 4791    | siRNA2 | s9508      | CCACAGAUUGGCAUAAACAt        | UGUUUAUGCACAUCUGUGGga           |                              |
| 37                     | Nfkb2 | Ambion_Plate 1 | K19      | NFKB2       | 4791    | siRNA3 | s9509      | GCACCAAGGUGAAGACCUAt        | AAGGUUUUACCUUGGUGCtg            |                              |
| 37                     | Nfkb2 | Qiagen_Plate 1 | C6       | NFKB2       | 4791    | siRNA4 | SI00300965 |                             |                                 | AACCCAGGTCTGGATGGTATT        |
| 37                     | Nfkb2 | Qiagen_Plate 1 | G14      | NFKB2       | 4791    | siRNA5 | SI04245318 |                             |                                 | CGCGTGTGCAACTCACCAA          |
| 37                     | Nfkb2 | Qiagen_Plate 1 | K19      | NFKB2       | 4791    | siRNA6 | SI04224290 |                             |                                 | AAGGACATGACTGCCAAITTT        |
| 38                     | RelA  | Ambion_Plate 1 | D6       | RELA        | 5970    | siRNA1 | s11914     | CCUUUAUCGUUUAUCCUGAt        | UCAGGGAUGACGUAAAAGGgAt          |                              |
| 38                     | RelA  | Ambion_Plate 1 | H14      | RELA        | 5970    | siRNA2 | s11915     | GGAGUACCCUGAGGCUUAAt        | UAUAGCCUCAGGUUAUCUCCat          |                              |
| 38                     | RelA  | Ambion_Plate 1 | L19      | RELA        | 5970    | siRNA3 | s11916     | GCUUUAUCCUUUAUCGUCAAt       | UGACGUAAAAGGGAUAGGGCtg          |                              |
| 38                     | RelA  | Qiagen_Plate 1 | D6       | RELA        | 5970    | siRNA4 | SI02663101 |                             |                                 | ATGGAGTACCCTGAGGCTATA        |
| 38                     | RelA  | Qiagen_Plate 1 | H14      | RELA        | 5970    | siRNA5 | SI02663094 |                             |                                 | CCGGATTGAGGAGAAACGTAA        |
| 38                     | RelA  | Qiagen_Plate 1 | L19      | RELA        | 5970    | siRNA6 | SI00301672 |                             |                                 | AAGATCAATGGCTACACAGGA        |
| 39                     | RelB  | Ambion_Plate 1 | E6       | RELB        | 5971    | siRNA1 | s11917     | GCUCAGGCGUGGACAAGAAt        | UUUUUGUCCAGCCGUGAGCtg           |                              |
| 39                     | RelB  | Ambion_Plate 1 | I14      | RELB        | 5971    | siRNA2 | s11918     | GGAUUUGCCGAAUUAACAAt        | UUUUUAUUUCCGCAAUUCCgc           |                              |
| 39                     | RelB  | Ambion_Plate 1 | M19      | RELB        | 5971    | siRNA3 | s11919     | CCCCGUCUAUGACAAGAAt         | UUUUUUGUUAUAGACGGGct            |                              |
| 39                     | RelB  | Qiagen_Plate 1 | E6       | RELB        | 5971    | siRNA4 | SI03038483 |                             |                                 | ACCACTGACACTGGACTCGTA        |
| 39                     | RelB  | Qiagen_Plate 1 | I14      | RELB        | 5971    | siRNA5 | SI00089138 |                             |                                 | CAGCTACGCGTGGACAAGAA         |
| 39                     | RelB  | Qiagen_Plate 1 | M19      | RELB        | 5971    | siRNA6 | SI00089131 |                             |                                 | CACAGATGAATTGGAGATCAT        |

| TABLE S1 (HUMAN siRNA) |       |                |          |             |         |        |            |                             |                                 |                              |
|------------------------|-------|----------------|----------|-------------|---------|--------|------------|-----------------------------|---------------------------------|------------------------------|
| Gene#                  | Name  | Plate Name     | Location | Gene Symbol | Gene ID | siRNA# | siRNA ID   | Ambion Sense siRNA Sequence | Ambion Antisense siRNA Sequence | Qiagen siRNA target sequence |
| 40                     | cRel  | Ambion_Plate 1 | F6       | REL         | 5966    | siRNA1 | s11905     | CCUUCUAAUUCGCAAGGUAtt       | UACCUUGCGAAUUAGAGGaa            |                              |
| 40                     | cRel  | Ambion_Plate 1 | J14      | REL         | 5966    | siRNA2 | s11906     | GAAGCUUUUUUUAACAAGAAtt      | UUCUUGUAAUUUAGUUUcct            |                              |
| 40                     | cRel  | Ambion_Plate 1 | N19      | REL         | 5966    | siRNA3 | s11907     | CCCAUUUUUAGACAACCGUtt       | ACGGUUGUCAUUUUUGGtt             |                              |
| 40                     | cRel  | Qiagen_Plate 1 | F6       | REL         | 5966    | siRNA4 | SI03070599 |                             |                                 | CAGGCCCAATTCCAATACTA         |
| 40                     | cRel  | Qiagen_Plate 1 | J14      | REL         | 5966    | siRNA5 | SI02629949 |                             |                                 | CCGTATATAGAGATAATTGA         |
| 40                     | cRel  | Qiagen_Plate 1 | N19      | REL         | 5966    | siRNA6 | SI00045591 |                             |                                 | CACAGAACCCTGAACAGTAAA        |
| 41                     | Tpl2  | Ambion_Plate 1 | G6       | MAP3K8      | 1326    | siRNA1 | s3383      | CCGCAGACCUACUAAAACatt       | UGUUUUUAGUAGUCUGCGGct           |                              |
| 41                     | Tpl2  | Ambion_Plate 1 | K14      | MAP3K8      | 1326    | siRNA2 | s3384      | CCCUCCUACCUUUAUAUAtt        | UUUUAUACAGGUAGGAGGgat           |                              |
| 41                     | Tpl2  | Ambion_Plate 1 | C20      | MAP3K8      | 1326    | siRNA3 | s3385      | GGAACUUCUGAGAACAUUtt        | AAUGUUCUCAGGAAGUUCcag           |                              |
| 41                     | Tpl2  | Qiagen_Plate 1 | G6       | MAP3K8      | 1326    | siRNA4 | SI02777362 |                             |                                 | AAGGATAATAGAGTAGCTTAA        |
| 41                     | Tpl2  | Qiagen_Plate 1 | K14      | MAP3K8      | 1326    | siRNA5 | SI02634674 |                             |                                 | AAGAAAGTGCATCCATCATGAT       |
| 41                     | Tpl2  | Qiagen_Plate 1 | C20      | MAP3K8      | 1326    | siRNA6 | SI00073773 |                             |                                 | AAGAGCAACAGTAATGGAGTA        |
| 42                     | Mekk1 | Ambion_Plate 1 | H6       | MAP3K1      | 4214    | siRNA1 | s8667      | GCGUAGCUCAAGGAUCAAAAtt      | UUUGAUCCUUGAGCUACGCct           |                              |
| 42                     | Mekk1 | Ambion_Plate 1 | L14      | MAP3K1      | 4214    | siRNA2 | s8668      | GGCUUCUGUUUUUUAAGAAtt       | UUUUAACAACGAGAGGCcag            |                              |
| 42                     | Mekk1 | Ambion_Plate 1 | D20      | MAP3K1      | 4214    | siRNA3 | s8669      | GAAUUCUCCAGGAGUAAGGAtt      | UCCUUUACUCCUGGAGAUUctg          |                              |
| 42                     | Mekk1 | Qiagen_Plate 1 | H6       | MAP3K1      | 4214    | siRNA4 | SI02659965 |                             |                                 | CTCCGGGTGTTTCAACTAGAA        |
| 42                     | Mekk1 | Qiagen_Plate 1 | L14      | MAP3K1      | 4214    | siRNA5 | SI02659958 |                             |                                 | CACGATGTCAAATTTCTCATA        |
| 42                     | Mekk1 | Qiagen_Plate 1 | D20      | MAP3K1      | 4214    | siRNA6 | SI00300727 |                             |                                 | AAACAAACCCTGGTGAATA          |
| 43                     | Mkk1  | Ambion_Plate 1 | I6       | MAP2K1      | 5604    | siRNA1 | s11167     | GGAACCAGAUCAUAAAGGAtt       | UCCUUUAUGAUCUGGUUCCgg           |                              |
| 43                     | Mkk1  | Ambion_Plate 1 | M14      | MAP2K1      | 5604    | siRNA2 | s11168     | UGUUCAGUCUGAAUUUUCAtt       | UGAAUUCCAGACUGAACAct            |                              |
| 43                     | Mkk1  | Ambion_Plate 1 | E20      | MAP2K1      | 5604    | siRNA3 | s11169     | AGGCCUUUUUUAACCCAGAAtt      | UUCUGGGUAGAAAGGCCUca            |                              |
| 43                     | Mkk1  | Qiagen_Plate 1 | I6       | MAP2K1      | 5604    | siRNA4 | SI02222962 |                             |                                 | CTGGATCAAGTCTGAAGAAA         |
| 43                     | Mkk1  | Qiagen_Plate 1 | M14      | MAP2K1      | 5604    | siRNA5 | SI02222955 |                             |                                 | CTGGAAGAAATTCCTGAACAAA       |
| 43                     | Mkk1  | Qiagen_Plate 1 | E20      | MAP2K1      | 5604    | siRNA6 | SI00300699 |                             |                                 | TTGTGAATAATGCTTAATAA         |
| 44                     | Mkk2  | Ambion_Plate 1 | J6       | MAP2K2      | 5605    | siRNA1 | s11170     | GAUCAGCAUUUGCAUGGAAtt       | UUCCAUGCAAUUGCUGAUctc           |                              |
| 44                     | Mkk2  | Ambion_Plate 1 | N14      | MAP2K2      | 5605    | siRNA2 | s11171     | GAACUUGACGAGCAGCAGAtt       | UCUUGCUGCUGCAAGUUCca            |                              |
| 44                     | Mkk2  | Ambion_Plate 1 | F20      | MAP2K2      | 5605    | siRNA3 | s11172     | CAAGACGAUGACUUCGAAtt        | UUCGAAGUCAUCGUUUUGgag           |                              |
| 44                     | Mkk2  | Qiagen_Plate 1 | J6       | MAP2K2      | 5605    | siRNA4 | SI02225097 |                             |                                 | CCGGCCTGCCATGCCATCTT         |
| 44                     | Mkk2  | Qiagen_Plate 1 | N14      | MAP2K2      | 5605    | siRNA5 | SI02225090 |                             |                                 | CAGCATTTGCATGGAAACAT         |
| 44                     | Mkk2  | Qiagen_Plate 1 | F20      | MAP2K2      | 5605    | siRNA6 | SI04436733 |                             |                                 | CTCAAAGACGATGACTTCGAA        |
| 45                     | Erk1  | Ambion_Plate 1 | K6       | MAPK3       | 5595    | siRNA1 | s11141     | GGACCAGAUUUAAACUUUtt        | AAAGGUUACAUCGGUCCag             |                              |
| 45                     | Erk1  | Ambion_Plate 1 | C15      | MAPK3       | 5595    | siRNA2 | s230179    | UGAUGGAGACUGACCUGUAtt       | UACAGGUCAGUCCAUCAcagg           |                              |
| 45                     | Erk1  | Ambion_Plate 1 | G20      | MAPK3       | 5595    | siRNA3 | s230180    | CAGCUGAGCAAUGACCAUtt        | UAUGGUCAUUGCUCAGCUGct           |                              |
| 45                     | Erk1  | Qiagen_Plate 1 | K6       | MAPK3       | 5595    | siRNA4 | SI00606004 |                             |                                 | CTCCCTGACCCGTCTAATATA        |
| 45                     | Erk1  | Qiagen_Plate 1 | C15      | MAPK3       | 5595    | siRNA5 | SI00605997 |                             |                                 | CCCGTCTAATATAATAATA          |
| 45                     | Erk1  | Qiagen_Plate 1 | G20      | MAPK3       | 5595    | siRNA6 | SI04379445 |                             |                                 | CAAGACTCGCGTGCCATCAA         |
| 46                     | Erk2  | Ambion_Plate 1 | L6       | MAPK1       | 5594    | siRNA1 | s11137     | CAGGGUUCUGACAGAAUAtt        | UAUUUCUGCAGGAACCCUGtg           |                              |
| 46                     | Erk2  | Ambion_Plate 1 | D15      | MAPK1       | 5594    | siRNA2 | s11138     | CAACCAUCGAGCAAUUGAAtt       | UUCAUUUGCUGAUGGUUGgt            |                              |
| 46                     | Erk2  | Ambion_Plate 1 | H20      | MAPK1       | 5594    | siRNA3 | s11139     | CGAGAAUUGCUUUAACAAtt        | UGUUAGAAAGCAUUUCUGCca           |                              |
| 46                     | Erk2  | Qiagen_Plate 1 | L6       | MAPK1       | 5594    | siRNA4 | SI00300762 |                             |                                 | AATGACATTATTGAGCACCA         |
| 46                     | Erk2  | Qiagen_Plate 1 | D15      | MAPK1       | 5594    | siRNA5 | SI00300755 |                             |                                 | AAGTTGCAGTAGCTATCAAGA        |
| 46                     | Erk2  | Qiagen_Plate 1 | H20      | MAPK1       | 5594    | siRNA6 | SI00300748 |                             |                                 | AACAAAGTTCGAGTAGCTATC        |
| 47                     | Mkk3  | Ambion_Plate 1 | M6       | MAP2K3      | 5606    | siRNA1 | s11173     | GGUCGACUGUUUUAACAUtt        | AGUGUAGAAACAGUCGACCgt           |                              |
| 47                     | Mkk3  | Ambion_Plate 1 | E15      | MAP2K3      | 5606    | siRNA2 | s11175     | CCCGACCUUUAUCACCAUtt        | AUGGUGAUGAAGGUCGGGgag           |                              |
| 47                     | Mkk3  | Ambion_Plate 1 | I20      | MAP2K3      | 5606    | siRNA3 | s11174     | ACAGAAUUCUUGAGGUGAtt        | UCCACCUCAAAGUUUCUGUct           |                              |
| 47                     | Mkk3  | Qiagen_Plate 1 | M6       | MAP2K3      | 5606    | siRNA4 | SI02222976 |                             |                                 | CCGGGCCACCGTGAACCTACA        |
| 47                     | Mkk3  | Qiagen_Plate 1 | E15      | MAP2K3      | 5606    | siRNA5 | SI02222969 |                             |                                 | ACGGATATCCTGCATGTCCAA        |
| 47                     | Mkk3  | Qiagen_Plate 1 | I20      | MAP2K3      | 5606    | siRNA6 | SI03649604 |                             |                                 | TCGACTGTTTCTACTGTCTCA        |
| 48                     | Mkk6  | Ambion_Plate 1 | N6       | MAP2K6      | 5608    | siRNA1 | s11180     | GGUAUCAUCACUAGAUAAAtt       | UUUAUCAUGAUGUAUCCat             |                              |
| 48                     | Mkk6  | Ambion_Plate 1 | F15      | MAP2K6      | 5608    | siRNA2 | s11181     | GGUGGACUCUGUUCUAAAtt        | UUUAGCAACAGAGUCCACca            |                              |
| 48                     | Mkk6  | Ambion_Plate 1 | J20      | MAP2K6      | 5608    | siRNA3 | s11179     | GCAUCACGAUGAUUGAUUtt        | AACUCAUAUCUGGAUGCcc             |                              |
| 48                     | Mkk6  | Qiagen_Plate 1 | N6       | MAP2K6      | 5608    | siRNA4 | SI02222997 |                             |                                 | AAGGCTTGCAATTTCTATTGGA       |
| 48                     | Mkk6  | Qiagen_Plate 1 | F15      | MAP2K6      | 5608    | siRNA5 | SI03089072 |                             |                                 | CTCATCAATGCTCTGGTCAA         |
| 48                     | Mkk6  | Qiagen_Plate 1 | J20      | MAP2K6      | 5608    | siRNA6 | SI00042805 |                             |                                 | TACGGTAGTGTAATTTATA          |
| 49                     | p38a  | Ambion_Plate 1 | C7       | MAPK14      | 1432    | siRNA1 | s3585      | CCUAAAACCUAGUAUUUAtt        | UAGAUUACUAGGUUUUAGGtc           |                              |
| 49                     | p38a  | Ambion_Plate 1 | G15      | MAPK14      | 1432    | siRNA2 | s3586      | GAAGCUUCCAGACCAUUtt         | AAAUGGUCUGGAGAGUUUcct           |                              |
| 49                     | p38a  | Ambion_Plate 1 | K20      | MAPK14      | 1432    | siRNA3 | s3587      | CUGCGGUUACUUAACAAtt         | UAUGUUUUAAGUAACCGCAGtt          |                              |
| 49                     | p38a  | Qiagen_Plate 1 | C7       | MAPK14      | 1432    | siRNA4 | SI00605157 |                             |                                 | CAGAGAAGTGCGGTTACTTAA        |
| 49                     | p38a  | Qiagen_Plate 1 | G15      | MAPK14      | 1432    | siRNA5 | SI00300769 |                             |                                 | AACTGCGGTTACTTAAACATA        |
| 49                     | p38a  | Qiagen_Plate 1 | K20      | MAPK14      | 1432    | siRNA6 | SI03098683 |                             |                                 | CTGGGAGGTGCCGAGCGCTTA        |
| 50                     | p38b  | Ambion_Plate 1 | D7       | MAPK11      | 5600    | siRNA1 | s11155     | GCGACUAUAUUGACAGCUtt        | AGCUGGUCAAUUGAUGUCGctt          |                              |
| 50                     | p38b  | Ambion_Plate 1 | H15      | MAPK11      | 5600    | siRNA2 | s11156     | GAACACGCCCGGACAUUAtt        | UUUAUUGCCGGCGGUUUctg            |                              |
| 50                     | p38b  | Ambion_Plate 1 | L20      | MAPK11      | 5600    | siRNA3 | s11157     | GGAGCUCACUUAACAGGAAtt       | UUCCUGGUUAGUGAGUCUctt           |                              |
| 50                     | p38b  | Qiagen_Plate 1 | D7       | MAPK11      | 5600    | siRNA4 | SI00606060 |                             |                                 | CTGAGCGACGAGCAGCTTCAA        |
| 50                     | p38b  | Qiagen_Plate 1 | H15      | MAPK11      | 5600    | siRNA5 | SI00606053 |                             |                                 | CAGGATGGAGCTGATCCAGTA        |
| 50                     | p38b  | Qiagen_Plate 1 | L20      | MAPK11      | 5600    | siRNA6 | SI03649597 |                             |                                 | TCCATCGAGACTTCAGCGAA         |
| 51                     | MK2   | Ambion_Plate 1 | E7       | MAPKAPK2    | 9261    | siRNA1 | s569       | GGAUCAUGCAAUCAAAAtt         | UUUGUUUUAUGCAUGAUCCaa           |                              |
| 51                     | MK2   | Ambion_Plate 1 | I15      | MAPKAPK2    | 9261    | siRNA2 | s570       | CAGUAUCUGCAUUCAUAtt         | UGAUUGAUGCAGAUUCUGga            |                              |
| 51                     | MK2   | Ambion_Plate 1 | M20      | MAPKAPK2    | 9261    | siRNA3 | s571       | GGACGGUGGAGAACUCUtt         | AAAGAUUUCUCCACCUGCCaa           |                              |
| 51                     | MK2   | Qiagen_Plate 1 | E7       | MAPKAPK2    | 9261    | siRNA4 | SI02223697 |                             |                                 | CTACGAGCAGATCAAGATAAA        |
| 51                     | MK2   | Qiagen_Plate 1 | I15      | MAPKAPK2    | 9261    | siRNA5 | SI00288246 |                             |                                 | CGCCATCATCGATGACTACAA        |
| 51                     | MK2   | Qiagen_Plate 1 | M20      | MAPKAPK2    | 9261    | siRNA6 | SI04438182 |                             |                                 | CCCGGCCACCATGCTGTCCAA        |
| 52                     | Mkk4  | Ambion_Plate 1 | F7       | MAP2K4      | 6416    | siRNA1 | s12703     | GCAACUGUGAAAGCACUAAtt       | UUAGUGUUUACAGUUGCta             |                              |
| 52                     | Mkk4  | Ambion_Plate 1 | J15      | MAP2K4      | 6416    | siRNA2 | s12701     | GGUAAACGCAAGCACUGAtt        | UCAGUGUUUUGCGUUUACcct           |                              |
| 52                     | Mkk4  | Ambion_Plate 1 | N20      | MAP2K4      | 6416    | siRNA3 | s12702     | GCAUCGAGGUUAAACGCAAtt       | UUUGUUUACCUUGCAUGCtg            |                              |
| 52                     | Mkk4  | Qiagen_Plate 1 | F7       | MAP2K4      | 6416    | siRNA4 | SI02655079 |                             |                                 | TTGACGAGGAGCTTATGGTT         |
| 52                     | Mkk4  | Qiagen_Plate 1 | J15      | MAP2K4      | 6416    | siRNA5 | SI02223102 |                             |                                 | AGGGTGTATAGTGTCCAAA          |
| 52                     | Mkk4  | Qiagen_Plate 1 | N20      | MAP2K4      | 6416    | siRNA6 | SI02223095 |                             |                                 | AGGGGAATGGTGTGTTTAA          |

| TABLE S1 (HUMAN siRNA) |           |                |          |             |         |        |            |                             |                                 |                              |
|------------------------|-----------|----------------|----------|-------------|---------|--------|------------|-----------------------------|---------------------------------|------------------------------|
| Gene#                  | Name      | Plate Name     | Location | Gene Symbol | Gene ID | siRNA# | siRNA ID   | Ambion Sense siRNA Sequence | Ambion Antisense siRNA Sequence | Qiagen siRNA target sequence |
| 53                     | Mkk7      | Ambion_Plate 1 | G7       | MAP2K7      | 5609    | siRNA1 | s11182     | CGUCAUUGCCGUUAAGCAAtt       | UUGCUUUAACGGCAAUGACGtg          |                              |
| 53                     | Mkk7      | Ambion_Plate 1 | K15      | MAP2K7      | 5609    | siRNA2 | s11183     | GACAGUUCUUCCUACAAGAAtt      | UUCUUGUAGGGAAACUGUcct           |                              |
| 53                     | Mkk7      | Ambion_Plate 1 | C21      | MAP2K7      | 5609    | siRNA3 | s11184     | GCAUUGAGAUUGACCAGAAtt       | UUCUGGUCAAUCUCAUUGCtc           |                              |
| 53                     | Mkk7      | Qiagen_Plate 1 | G7       | MAP2K7      | 5609    | siRNA4 | SI02660588 |                             |                                 | CAGGAAGAGACCAAAGTATA         |
| 53                     | Mkk7      | Qiagen_Plate 1 | K15      | MAP2K7      | 5609    | siRNA5 | SI00300720 |                             |                                 | AAAGATGACAGTGGCGATTGT        |
| 53                     | Mkk7      | Qiagen_Plate 1 | C21      | MAP2K7      | 5609    | siRNA6 | SI04380831 |                             |                                 | CTGCGCTGAGAAGCTCAAGAA        |
| 54                     | Jnk1      | Ambion_Plate 1 | H7       | MAPK8       | 5599    | siRNA1 | s11152     | GUUGCAAUCAAGAAGUCAAtt       | UUAGCUUUCUUAUUGCAAcAt           |                              |
| 54                     | Jnk1      | Ambion_Plate 1 | L15      | MAPK8       | 5599    | siRNA2 | s11153     | CAAAGAUCCUGACAAGCAAtt       | UGCUUGUCAGGGAUCUUUGgt           |                              |
| 54                     | Jnk1      | Ambion_Plate 1 | D21      | MAPK8       | 5599    | siRNA3 | s11154     | CCAGUAAUUAUAGUUAUAAtt       | UUUACUACUUAUUAUUGGgc            |                              |
| 54                     | Jnk1      | Qiagen_Plate 1 | H7       | MAPK8       | 5599    | siRNA4 | SI02758651 |                             |                                 | ATGATGTGTCTTCAATGTCAA        |
| 54                     | Jnk1      | Qiagen_Plate 1 | L15      | MAPK8       | 5599    | siRNA5 | SI02758644 |                             |                                 | ATGAAATGTGTTAATCACAAA        |
| 54                     | Jnk1      | Qiagen_Plate 1 | D21      | MAPK8       | 5599    | siRNA6 | SI02758637 |                             |                                 | GCCCAAGTAATAGTAGTAAA         |
| 55                     | Jnk2      | Ambion_Plate 1 | I7       | MAPK9       | 5601    | siRNA1 | s1229708   | GCAUUCAGCUGGUUAUAUAtt       | AAUUAUACCAGCUGAAUGCag           |                              |
| 55                     | Jnk2      | Ambion_Plate 1 | M15      | MAPK9       | 5601    | siRNA2 | s229709    | GGAAAGAGCUAAUUUAACAAtt      | UUUGUAAUUAGCUCUUUCCat           |                              |
| 55                     | Jnk2      | Ambion_Plate 1 | E21      | MAPK9       | 5601    | siRNA3 | s229710    | GAUUUAUUGCGAAAACAGAtt       | UCUGUUUUCGACAUUAUUCct           |                              |
| 55                     | Jnk2      | Qiagen_Plate 1 | I7       | MAPK9       | 5601    | siRNA4 | SI02222920 |                             |                                 | ATCGTGAACCTGTCTCTTAA         |
| 55                     | Jnk2      | Qiagen_Plate 1 | M15      | MAPK9       | 5601    | siRNA5 | SI00300797 |                             |                                 | AAGAGAGCTTATCGTGAACCT        |
| 55                     | Jnk2      | Qiagen_Plate 1 | E21      | MAPK9       | 5601    | siRNA6 | SI04950344 |                             |                                 | ATCCTGGTATGGGCTACAAA         |
| 56                     | Jnk3      | Ambion_Plate 1 | J7       | MAPK10      | 5602    | siRNA1 | s11161     | GGAAUAAAGUUAUUGAACAtt       | UGUUAUUAUUAUUAUUGCac            |                              |
| 56                     | Jnk3      | Ambion_Plate 1 | N15      | MAPK10      | 5602    | siRNA2 | s11162     | CAAGUAAUUAUUGUAGUCAAtt      | UUUUAUUAUUAUUAUUGGgt            |                              |
| 56                     | Jnk3      | Ambion_Plate 1 | F21      | MAPK10      | 5602    | siRNA3 | s11163     | CCAUUAUUGUGGACACGUAtt       | AACGUGUCACCACAUUUGGag           |                              |
| 56                     | Jnk3      | Qiagen_Plate 1 | J7       | MAPK10      | 5602    | siRNA4 | SI02222934 |                             |                                 | TCCGAGACAATAAACTCAA          |
| 56                     | Jnk3      | Qiagen_Plate 1 | N15      | MAPK10      | 5602    | siRNA5 | SI02222927 |                             |                                 | CCGATGTGTCTGATTATA           |
| 56                     | Jnk3      | Qiagen_Plate 1 | F21      | MAPK10      | 5602    | siRNA6 | SI04436719 |                             |                                 | ACCAAGTAACATTGTAGTCAA        |
| 57                     | Erk3      | Ambion_Plate 1 | K7       | MAPK12      | 6300    | siRNA1 | s12467     | CAGUUCUUGUGUACCAAGAtt       | UCUGGUACACGAGGAACUGga           |                              |
| 57                     | Erk3      | Ambion_Plate 1 | C16      | MAPK12      | 6300    | siRNA2 | s12468     | GAAGUUAUUGAUGACUUUAtt       | AAAGGAGUCAUUAUUAUUGctg          |                              |
| 57                     | Erk3      | Ambion_Plate 1 | G21      | MAPK12      | 6300    | siRNA3 | s12469     | GCAAGCUAUGAAACAGUAtt        | UCAUGUUUAUUGAGCUUGCcc           |                              |
| 57                     | Erk3      | Qiagen_Plate 1 | K7       | MAPK12      | 6300    | siRNA4 | SI02223088 |                             |                                 | TGGAGCGTGTACTTACAAA          |
| 57                     | Erk3      | Qiagen_Plate 1 | C16      | MAPK12      | 6300    | siRNA5 | SI02223081 |                             |                                 | CTGGACGTATCACTCTGTAT         |
| 57                     | Erk3      | Qiagen_Plate 1 | G21      | MAPK12      | 6300    | siRNA6 | SI03649625 |                             |                                 | CTGGGAGGTGCGCGCCGTGTA        |
| 58                     | p38d      | Ambion_Plate 1 | L7       | MAPK13      | 5603    | siRNA1 | s11164     | AAUAGGAGCUGUAGUUAUAtt       | UCAGUUAUUAUUAUUAUUGca           |                              |
| 58                     | p38d      | Ambion_Plate 1 | D16      | MAPK13      | 5603    | siRNA2 | s11165     | GGUUAUUAUUGUAGUUAUAtt       | UUUUAUUAUUAUUAUUGCag            |                              |
| 58                     | p38d      | Ambion_Plate 1 | H21      | MAPK13      | 5603    | siRNA3 | s11166     | GCACAUUAUUAUUAUUAUAtt       | AAUUAUUAUUAUUAUUGGctg           |                              |
| 58                     | p38d      | Qiagen_Plate 1 | L7       | MAPK13      | 5603    | siRNA4 | SI02222948 |                             |                                 | CGGGATGAGCTCATCCGGAA         |
| 58                     | p38d      | Qiagen_Plate 1 | D16      | MAPK13      | 5603    | siRNA5 | SI02222941 |                             |                                 | CCGAGTGGCATGAAGCTGTA         |
| 58                     | p38d      | Qiagen_Plate 1 | H21      | MAPK13      | 5603    | siRNA6 | SI04379459 |                             |                                 | CAGCCGTTGTATGATCTCTTA        |
| 59                     | TRIF      | Ambion_Plate 1 | M7       | TICAM1      | 148022  | siRNA1 | s45113     | GACAAGCUCUUGUAUUGAtt        | UCAGAUUAUUAUUAUUGUcct           |                              |
| 59                     | TRIF      | Ambion_Plate 1 | E16      | TICAM1      | 148022  | siRNA2 | s45114     | GAUAUUAUUAUUAUUAUUGAtt      | UCUUAUUAUUAUUAUUGCca            |                              |
| 59                     | TRIF      | Ambion_Plate 1 | I21      | TICAM1      | 148022  | siRNA3 | s45115     | CCAUAUUAUUAUUAUUAUUGAtt     | AUCUUAUUAUUAUUAUUGGag           |                              |
| 59                     | TRIF      | Qiagen_Plate 1 | M7       | TICAM1      | 148022  | siRNA4 | SI03074946 |                             |                                 | CCAGAGCTACTTGTCTCTCCA        |
| 59                     | TRIF      | Qiagen_Plate 1 | E16      | TICAM1      | 148022  | siRNA5 | SI03069332 |                             |                                 | CAGGACGCTATGACCACTCA         |
| 59                     | TRIF      | Qiagen_Plate 1 | I21      | TICAM1      | 148022  | siRNA6 | SI03032127 |                             |                                 | AAGATACCACCTCTCAAATA         |
| 60                     | TRAM      | Ambion_Plate 1 | N7       | TICAM2      | 353376  | siRNA1 | s51476     | GAAGUUAUUAUUAUUAUUGAtt      | UAGGAAUUAUUAUUAUUGUcct          |                              |
| 60                     | TRAM      | Ambion_Plate 1 | F16      | TICAM2      | 353376  | siRNA2 | s51477     | GGAAUUAUUAUUAUUAUUGAtt      | UCUCAGGAAUUAUUAUUGCgg           |                              |
| 60                     | TRAM      | Ambion_Plate 1 | J21      | TICAM2      | 353376  | siRNA3 | s51478     | CGUUAUUAUUAUUAUUAUUGAtt     | UUUUAUUAUUAUUAUUGGga            |                              |
| 60                     | TRAM      | Qiagen_Plate 1 | N7       | TICAM2      | 353376  | siRNA4 | SI03113845 |                             |                                 | TCCAGTTCTATACGTCTCTAA        |
| 60                     | TRAM      | Qiagen_Plate 1 | F16      | TICAM2      | 353376  | siRNA5 | SI02644880 |                             |                                 | TTGCTGAGATGAACAATATA         |
| 60                     | TRAM      | Qiagen_Plate 1 | J21      | TICAM2      | 353376  | siRNA6 | SI00130893 |                             |                                 | CTCCGTTAACCAGGAGCAGATA       |
| 61                     | RIP1      | Ambion_Plate 1 | C8       | RIPK1       | 8737    | siRNA1 | s16651     | CCACUAGUCUGACGGUAUAtt       | UUUAUUAUUAUUAUUAUUGta           |                              |
| 61                     | RIP1      | Ambion_Plate 1 | G16      | RIPK1       | 8737    | siRNA2 | s16652     | GCAAGACCUUUAUUAUUAUUGAtt    | AUUUAUUAUUAUUAUUAUUGctg         |                              |
| 61                     | RIP1      | Ambion_Plate 1 | K21      | RIPK1       | 8737    | siRNA3 | s16653     | GUGUAGAAGAGGACGUAUAtt       | UUUAUUAUUAUUAUUAUUGCact         |                              |
| 61                     | RIP1      | Qiagen_Plate 1 | C8       | RIPK1       | 8737    | siRNA4 | SI02621983 |                             |                                 | CCGACATTTCTGCGATTGAA         |
| 61                     | RIP1      | Qiagen_Plate 1 | G16      | RIPK1       | 8737    | siRNA5 | SI00288092 |                             |                                 | TACCATAGTCTGACGGATTAA        |
| 61                     | RIP1      | Qiagen_Plate 1 | K21      | RIPK1       | 8737    | siRNA6 | SI04437860 |                             |                                 | TCCGTTAACGTTAATACCCAA        |
| 62                     | FADD      | Ambion_Plate 1 | D8       | FADD        | 8772    | siRNA1 | s16705     | GCAGUCCUUAUUAUUAUUGAtt      | UUAGGAAUUAUUAUUAUUGCct          |                              |
| 62                     | FADD      | Ambion_Plate 1 | H16      | FADD        | 8772    | siRNA2 | s16706     | ACAGCAUCGAGGACAGUAUAtt      | UAUUAUUAUUAUUAUUAUUGcg          |                              |
| 62                     | FADD      | Ambion_Plate 1 | L21      | FADD        | 8772    | siRNA3 | s16707     | AGAUCGACAGCAUCGAGGAtt       | UCCUUAUUAUUAUUAUUAUUGt          |                              |
| 62                     | FADD      | Qiagen_Plate 1 | D8       | FADD        | 8772    | siRNA4 | SI03649016 |                             |                                 | CAGCGGATCTCGTATCTTTA         |
| 62                     | FADD      | Qiagen_Plate 1 | H16      | FADD        | 8772    | siRNA5 | SI03648911 |                             |                                 | AGCGGATCTCGTATCTTTA          |
| 62                     | FADD      | Qiagen_Plate 1 | L21      | FADD        | 8772    | siRNA6 | SI00300223 |                             |                                 | AAGAAGACCTGTGTGAGCAT         |
| 63                     | Caspase 8 | Ambion_Plate 1 | E8       | CASP8       | 841     | siRNA1 | s2427      | GAUUAUUAUUAUUAUUAUUGAtt     | UUUAUUAUUAUUAUUAUUGccc          |                              |
| 63                     | Caspase 8 | Ambion_Plate 1 | I16      | CASP8       | 841     | siRNA2 | s2425      | GAUUAUUAUUAUUAUUAUUGAtt     | UUUAUUAUUAUUAUUAUUGctt          |                              |
| 63                     | Caspase 8 | Ambion_Plate 1 | M21      | CASP8       | 841     | siRNA3 | s2426      | GAUCAGAAUUAUUAUUAUUGAtt     | AAAGACCUAAUUAUUAUUGctg          |                              |
| 63                     | Caspase 8 | Qiagen_Plate 1 | E8       | CASP8       | 841     | siRNA4 | SI02662457 |                             |                                 | GACAAAGTTTACCAAATGAAA        |
| 63                     | Caspase 8 | Qiagen_Plate 1 | I16      | CASP8       | 841     | siRNA5 | SI02661946 |                             |                                 | AAGAGTCTGTGCCAAATCAA         |
| 63                     | Caspase 8 | Qiagen_Plate 1 | M21      | CASP8       | 841     | siRNA6 | SI00299593 |                             |                                 | AAGTTCTGAGCTGTGACTAC         |
| 64                     | TBK1      | Ambion_Plate 1 | F8       | TBK1        | 29110   | siRNA1 | s761       | GAACUUAUUAUUAUUAUUGAtt      | UUUAUUAUUAUUAUUAUUGtg           |                              |
| 64                     | TBK1      | Ambion_Plate 1 | J16      | TBK1        | 29110   | siRNA2 | s763       | GGCAACAUAUUAUUAUUGAtt       | UUUAUUAUUAUUAUUAUUGCag          |                              |
| 64                     | TBK1      | Ambion_Plate 1 | N21      | TBK1        | 29110   | siRNA3 | s762       | GAACCUUAUUAUUAUUAUUGAtt     | UUUAUUAUUAUUAUUAUUGCcg          |                              |
| 64                     | TBK1      | Qiagen_Plate 1 | F8       | TBK1        | 29110   | siRNA4 | SI02224418 |                             |                                 | CTGACTTGACAGCTTTGTAAA        |
| 64                     | TBK1      | Qiagen_Plate 1 | J16      | TBK1        | 29110   | siRNA5 | SI02224411 |                             |                                 | CAGAAGTATAGATTAGCTTATA       |
| 64                     | TBK1      | Qiagen_Plate 1 | N21      | TBK1        | 29110   | siRNA6 | SI00301889 |                             |                                 | AAAGCGGAGAGTTAGGTGAAA        |
| 65                     | IKKe      | Ambion_Plate 2 | C3       | IKBKE       | 9641    | siRNA1 | s18536     | CGACACAGGAGUACCUUAtt        | AGAGGUUAUUAUUAUUAUUGgg          |                              |
| 65                     | IKKe      | Ambion_Plate 2 | G8       | IKBKE       | 9641    | siRNA2 | s18537     | CAGUGCUUUAUUAUUAUUGAtt      | UCUUAUUAUUAUUAUUAUUGgaa         |                              |
| 65                     | IKKe      | Ambion_Plate 2 | K16      | IKBKE       | 9641    | siRNA3 | s18538     | AGCUUGAAUUAUUAUUAUUGAtt     | AAAUUAUUAUUAUUAUUAUUGctg        |                              |
| 65                     | IKKe      | Qiagen_Plate 2 | C3       | IKBKE       | 9641    | siRNA4 | SI02655324 |                             |                                 | CAAGTGAACCTCATCTACAA         |
| 65                     | IKKe      | Qiagen_Plate 2 | G8       | IKBKE       | 9641    | siRNA5 | SI02655317 |                             |                                 | AAGAAGCATCCAGCAGATTCA        |
| 65                     | IKKe      | Qiagen_Plate 2 | K16      | IKBKE       | 9641    | siRNA6 | SI02622326 |                             |                                 | CCGCATCATCGAACGGCTAAA        |

| TABLE S1 (HUMAN siRNA) |         |                |          |             |         |        |            |                             |                                 |                              |
|------------------------|---------|----------------|----------|-------------|---------|--------|------------|-----------------------------|---------------------------------|------------------------------|
| Gene#                  | Name    | Plate Name     | Location | Gene Symbol | Gene ID | siRNA# | siRNA ID   | Ambion Sense siRNA Sequence | Ambion Antisense siRNA Sequence | Qiagen siRNA target sequence |
| 66                     | IRF3    | Ambion_Plate 2 | D3       | IRF3        | 3661    | siRNA1 | s7507      | ACACCUCUCCGGACACCAAtt       | UUGGUGUCCGGAGAGGUGUct           |                              |
| 66                     | IRF3    | Ambion_Plate 2 | H8       | IRF3        | 3661    | siRNA2 | s7508      | GCAGUACUUCUGAUCCCAAtt       | UGGGUUAUCAGAGUACUGCct           |                              |
| 66                     | IRF3    | Ambion_Plate 2 | L16      | IRF3        | 3661    | siRNA3 | s7509      | ACAUAAAUCUACGAGUUUtt        | AAACUCGUGAUUUUAUGUgg            |                              |
| 66                     | IRF3    | Qiagen_Plate 2 | D3       | IRF3        | 3661    | siRNA4 | SI05587617 |                             |                                 | TTGGTCTGTTACCCAAGAA          |
| 66                     | IRF3    | Qiagen_Plate 2 | H8       | IRF3        | 3661    | siRNA5 | SI03117359 |                             |                                 | TCTGGATGAGTTACTGGGTAA        |
| 66                     | IRF3    | Qiagen_Plate 2 | L16      | IRF3        | 3661    | siRNA6 | SI02626526 |                             |                                 | CAGCCTCGAGTTTGAGAGCTA        |
| 67                     | Duba    | Ambion_Plate 2 | E3       | OTUD5       | 55593   | siRNA1 | s31035     | GAUUUCCACUUAUUUcAtt         | UGAAUUUAUGUGGAUUUcGg            |                              |
| 67                     | Duba    | Ambion_Plate 2 | I8       | OTUD5       | 55593   | siRNA2 | s31036     | CCACCUACAUUAACAGGAAtt       | UUCCUGUUAUUGUAGGUGGta           |                              |
| 67                     | Duba    | Ambion_Plate 2 | M16      | OTUD5       | 55593   | siRNA3 | s31037     | CCAUCGGAUUUCCACUAUtt        | AUAGUGGAUUUCCGAGUGGta           |                              |
| 67                     | Duba    | Qiagen_Plate 2 | E3       | OTUD5       | 55593   | siRNA4 | SI04303754 |                             |                                 | CCCATTCTGTAGTACCAT           |
| 67                     | Duba    | Qiagen_Plate 2 | I8       | OTUD5       | 55593   | siRNA5 | SI04245283 |                             |                                 | TGCCGACTACTTCCCACTA          |
| 67                     | Duba    | Qiagen_Plate 2 | M16      | OTUD5       | 55593   | siRNA6 | SI04153982 |                             |                                 | TACCACCTACATTAACAGGAA        |
| 68                     | TRADD   | Ambion_Plate 2 | F3       | TRADD       | 8717    | siRNA1 | s16606     | CUGUUUGAGUUGCAUCCUAtt       | UAGGAUGCAACUCAAACAGcg           |                              |
| 68                     | TRADD   | Ambion_Plate 2 | J8       | TRADD       | 8717    | siRNA2 | s16607     | GCACUACCGUUGUUGGAtt         | UCCACAACAGGUUAGCGCtg            |                              |
| 68                     | TRADD   | Ambion_Plate 2 | N16      | TRADD       | 8717    | siRNA3 | s16608     | GAUGCGCUGCGAAUUCUGAtt       | UCAGAUUUCGCGAGCUGCct            |                              |
| 68                     | TRADD   | Qiagen_Plate 2 | F3       | TRADD       | 8717    | siRNA4 | SI02655240 |                             |                                 | CAGGGTCAGCCTGTAGTGAAT        |
| 68                     | TRADD   | Qiagen_Plate 2 | J8       | TRADD       | 8717    | siRNA5 | SI03098942 |                             |                                 | CTGGGCTGACCGATCCCAAT         |
| 68                     | TRADD   | Qiagen_Plate 2 | N16      | TRADD       | 8717    | siRNA6 | SI03085026 |                             |                                 | CGCGCGCTCTGGGTCTCAA          |
| 69                     | TANK    | Ambion_Plate 2 | G3       | TANK        | 10010   | siRNA1 | s19453     | CACUCAAGAUAAACAAUAtt        | AUAAUUUUUAUUUUGAGUGga           |                              |
| 69                     | TANK    | Ambion_Plate 2 | K8       | TANK        | 10010   | siRNA2 | s19454     | GAACUUAUGAGCAGAGAAUAtt      | UAUUCUCUGUCUUAUGUUCtc           |                              |
| 69                     | TANK    | Ambion_Plate 2 | C17      | TANK        | 10010   | siRNA3 | s19455     | GAGAUUCUGCAGUAAAAGAtt       | UCUUUUACUGCAGAAUUCtA            |                              |
| 69                     | TANK    | Qiagen_Plate 2 | G3       | TANK        | 10010   | siRNA4 | SI03115322 |                             |                                 | TCCGCGAGGCATGCATGGATA        |
| 69                     | TANK    | Qiagen_Plate 2 | K8       | TANK        | 10010   | siRNA5 | SI03023608 |                             |                                 | TTGACTCTTGATCAGCCAAA         |
| 69                     | TANK    | Qiagen_Plate 2 | C17      | TANK        | 10010   | siRNA6 | SI02632665 |                             |                                 | ATCCTTTATAGTGATGCTACA        |
| 70                     | SINTBAD | Ambion_Plate 2 | H3       | TBKBP1      | 9755    | siRNA1 | s18828     | GCCUCAAGUCUACGAGAAtt        | AUCUCGUAGACUUUGAGGCgg           |                              |
| 70                     | SINTBAD | Ambion_Plate 2 | L8       | TBKBP1      | 9755    | siRNA2 | s18829     | GGAUUGCCUCUACAAAtt          | UUUGAUGAGGGCAUCAUCcg            |                              |
| 70                     | SINTBAD | Ambion_Plate 2 | D17      | TBKBP1      | 9755    | siRNA3 | s18830     | CAGCAUGAGUUAACAGAAAtt       | UCUUCUGUAACUCAUGCUGga           |                              |
| 70                     | SINTBAD | Qiagen_Plate 2 | H3       | TBKBP1      | 9755    | siRNA4 | SI04227629 |                             |                                 | CACCATGGAGTCCATGTTCTGA       |
| 70                     | SINTBAD | Qiagen_Plate 2 | L8       | TBKBP1      | 9755    | siRNA5 | SI04201575 |                             |                                 | CCGACGCCCTCAAAGTCTA          |
| 70                     | SINTBAD | Qiagen_Plate 2 | D17      | TBKBP1      | 9755    | siRNA6 | SI04177579 |                             |                                 | CACTGCTTACGGAGACATCAA        |
| 71                     | BTK     | Ambion_Plate 2 | I3       | BTK         | 695     | siRNA1 | s2124      | GAACUGUUUGUUAACGAtt         | UCGUUUACCAAACAGUUUcga           |                              |
| 71                     | BTK     | Ambion_Plate 2 | M8       | BTK         | 695     | siRNA2 | s2125      | CACCAGCUAAAACGUAAAtt        | UUACGUUUUUGAGCUGGUGaa           |                              |
| 71                     | BTK     | Ambion_Plate 2 | E17      | BTK         | 695     | siRNA3 | s2126      | CAGUAGAAGGGUUAUCAUAtt       | UAUUGAACCCUUCUUAUCGcc           |                              |
| 71                     | BTK     | Qiagen_Plate 2 | I3       | BTK         | 695     | siRNA4 | SI03058468 |                             |                                 | CACCGGAAGTCCTGATGTATA        |
| 71                     | BTK     | Qiagen_Plate 2 | M8       | BTK         | 695     | siRNA5 | SI00001043 |                             |                                 | CCCTTTATGATTACATGCCAA        |
| 71                     | BTK     | Qiagen_Plate 2 | E17      | BTK         | 695     | siRNA6 | SI00001036 |                             |                                 | ACAGACTGAATTTGCGATGAA        |
| 72                     | NIK     | Ambion_Plate 2 | J3       | MAP3K14     | 9020    | siRNA1 | s17186     | GUCCAAUACAGUCUUAUAtt        | UAAGAGACUGUAUUUGGACTt           |                              |
| 72                     | NIK     | Ambion_Plate 2 | N8       | MAP3K14     | 9020    | siRNA2 | s17187     | GGAUUGACCUACCCAGAAtt        | UUCUGGGUGAGGUCAUUCctg           |                              |
| 72                     | NIK     | Ambion_Plate 2 | F17      | MAP3K14     | 9020    | siRNA3 | s17188     | GGAAUUAUGAGUACCCAGAAtt      | UUCUCGGUACUCAUAAUCCac           |                              |
| 72                     | NIK     | Qiagen_Plate 2 | J3       | MAP3K14     | 9020    | siRNA4 | SI02632343 |                             |                                 | TACCTAGTGCATGCTCTGCAA        |
| 72                     | NIK     | Qiagen_Plate 2 | N8       | MAP3K14     | 9020    | siRNA5 | SI02632336 |                             |                                 | CACATGCATGTGACTCCTCAA        |
| 72                     | NIK     | Qiagen_Plate 2 | F17      | MAP3K14     | 9020    | siRNA6 | SI00058324 |                             |                                 | CCCCTTGGATCAGTGACCAT         |
| 73                     | AKT1    | Ambion_Plate 2 | K3       | AKT1        | 207     | siRNA1 | s659       | CGGUGACCAUGAACGAGUUtt       | AACUCGUUAUGGUCACGCgg            |                              |
| 73                     | AKT1    | Ambion_Plate 2 | C9       | AKT1        | 207     | siRNA2 | s660       | GAACAUCGGAUUCAGUAtt         | UACGUGAAUCGGAUUGUUCctg          |                              |
| 73                     | AKT1    | Ambion_Plate 2 | G17      | AKT1        | 207     | siRNA3 | s661       | CGGUAGCACUUGACUUUUtt        | AAAAGGUCAAUGUCUACCGtg           |                              |
| 73                     | AKT1    | Qiagen_Plate 2 | K3       | AKT1        | 207     | siRNA4 | SI02758406 |                             |                                 | CACCATGAGCGACGTGGCTAT        |
| 73                     | AKT1    | Qiagen_Plate 2 | C9       | AKT1        | 207     | siRNA5 | SI02757244 |                             |                                 | CACGCTTGTCCGAGGCCAA          |
| 73                     | AKT1    | Qiagen_Plate 2 | G17      | AKT1        | 207     | siRNA6 | SI00299159 |                             |                                 | AAGTACTCTTCCAGACCCAC         |
| 74                     | AKT2    | Ambion_Plate 2 | L3       | AKT2        | 208     | siRNA1 | s1215      | CAACUUCUCCGAGCAGAAtt        | UUCUGCUACGGAGAAGUUgtt           |                              |
| 74                     | AKT2    | Ambion_Plate 2 | D9       | AKT2        | 208     | siRNA2 | s1216      | CGGGCUAAAGUGACCAUGAtt       | UCAUGGUCACUUUAGCCGtg            |                              |
| 74                     | AKT2    | Ambion_Plate 2 | H17      | AKT2        | 208     | siRNA3 | s1217      | UGAUUCGACUUAUCUAAAtt        | UUUGAGAUAGUCGAAGUAtt            |                              |
| 74                     | AKT2    | Qiagen_Plate 2 | L3       | AKT2        | 208     | siRNA4 | SI00299173 |                             |                                 | AAGTACTCTCGATGATGAATT        |
| 74                     | AKT2    | Qiagen_Plate 2 | D9       | AKT2        | 208     | siRNA5 | SI00299166 |                             |                                 | AACAACCTTCCGTAGCAGAA         |
| 74                     | AKT2    | Qiagen_Plate 2 | H17      | AKT2        | 208     | siRNA6 | SI00287679 |                             |                                 | CAAGCGTGTGAATACATCAA         |
| 75                     | AKT3    | Ambion_Plate 2 | M3       | AKT3        | 10000   | siRNA1 | s19427     | GUAACAUCUGAGACAGAUAtt       | UAUCUGUCUCAGAUUUUActt           |                              |
| 75                     | AKT3    | Ambion_Plate 2 | E9       | AKT3        | 10000   | siRNA2 | s19428     | GGACUUAUCAUUCCGGAtt         | UCCGGAUUGUAGAUUGUCcAa           |                              |
| 75                     | AKT3    | Ambion_Plate 2 | I17      | AKT3        | 10000   | siRNA3 | s19429     | GCUCUUAUCAGGAUAUAAAtt       | UUUAUCCUUAUGAAUGAGCca           |                              |
| 75                     | AKT3    | Qiagen_Plate 2 | M3       | AKT3        | 10000   | siRNA4 | SI02757762 |                             |                                 | ACCAGAGGTGTTAGAAGATA         |
| 75                     | AKT3    | Qiagen_Plate 2 | E9       | AKT3        | 10000   | siRNA5 | SI04899874 |                             |                                 | ATGAAGTGGCACACACTCTAA        |
| 75                     | AKT3    | Qiagen_Plate 2 | I17      | AKT3        | 10000   | siRNA6 | SI04899867 |                             |                                 | ATGGCTCATTATAGGATATA         |
| 76                     | PIK3CA  | Ambion_Plate 2 | N3       | PIK3CA      | 5290    | siRNA1 | s10520     | GACUAGCUCAGACAAUUGAtt       | UCAUUGUCUCUAGCUAGUctg           |                              |
| 76                     | PIK3CA  | Ambion_Plate 2 | F9       | PIK3CA      | 5290    | siRNA2 | s10521     | GUAAUUAUCCAGAUCCUAtt        | AUAGGAUUCGGUAAUUAUCag           |                              |
| 76                     | PIK3CA  | Ambion_Plate 2 | J17      | PIK3CA      | 5290    | siRNA3 | s10522     | GGUGCACUCGAGUUAUCAAtt       | UGUUGAACUCGAGUCCActt            |                              |
| 76                     | PIK3CA  | Qiagen_Plate 2 | N3       | PIK3CA      | 5290    | siRNA4 | SI02665369 |                             |                                 | CTCCGTGAGGCTACATTAATA        |
| 76                     | PIK3CA  | Qiagen_Plate 2 | F9       | PIK3CA      | 5290    | siRNA5 | SI02622207 |                             |                                 | CTGAGTCAGTATAAGTATATA        |
| 76                     | PIK3CA  | Qiagen_Plate 2 | J17      | PIK3CA      | 5290    | siRNA6 | SI04380635 |                             |                                 | AAGCTTTAGAATAATGCGCAA        |
| 77                     | PIK3CB  | Ambion_Plate 2 | C4       | PIK3CB      | 5291    | siRNA1 | s10524     | CUCCAAUUGUUGCGUUGAtt        | UCAAGCGCAAAUUUGGAGtg            |                              |
| 77                     | PIK3CB  | Ambion_Plate 2 | G9       | PIK3CB      | 5291    | siRNA2 | s10525     | GGGAAAGCUGGACUUAUAtt        | UUAGUAGUCCAGUUUCCctg            |                              |
| 77                     | PIK3CB  | Ambion_Plate 2 | K17      | PIK3CB      | 5291    | siRNA3 | s10523     | GUAUAUGAAUUCGAAAGAtt        | UUUUUUGAAUUAUUUUAUctt           |                              |
| 77                     | PIK3CB  | Qiagen_Plate 2 | C4       | PIK3CB      | 5291    | siRNA4 | SI02622221 |                             |                                 | TCGGGAAGCTACCATTCTTA         |
| 77                     | PIK3CB  | Qiagen_Plate 2 | G9       | PIK3CB      | 5291    | siRNA5 | SI02622214 |                             |                                 | CCCTTCGATAAGATTATTGAA        |
| 77                     | PIK3CB  | Qiagen_Plate 2 | K17      | PIK3CB      | 5291    | siRNA6 | SI04436327 |                             |                                 | TACGTCGAGAATATGCTGTA         |
| 78                     | PIK3CD  | Ambion_Plate 2 | D4       | PIK3CD      | 5293    | siRNA1 | s10529     | GUGAGAAUUUGAACGUGUtt        | AACCGUUCAAUUUUCUCAcAa           |                              |
| 78                     | PIK3CD  | Ambion_Plate 2 | H9       | PIK3CD      | 5293    | siRNA2 | s10530     | GACUAAUUAUGAGAGAAAtt        | UUUCUCACUUAUUUUGUctt            |                              |
| 78                     | PIK3CD  | Ambion_Plate 2 | L17      | PIK3CD      | 5293    | siRNA3 | s10531     | GCACUCCGAGUGAAGUUtt         | AAACUACUCGGAAGUGCtt             |                              |
| 78                     | PIK3CD  | Qiagen_Plate 2 | D4       | PIK3CD      | 5293    | siRNA4 | SI02223816 |                             |                                 | CGCGGTGATCGAGAAGCCAA         |
| 78                     | PIK3CD  | Qiagen_Plate 2 | H9       | PIK3CD      | 5293    | siRNA5 | SI02223809 |                             |                                 | CCGTCACGCATGAAGCCAAA         |
| 78                     | PIK3CD  | Qiagen_Plate 2 | L17      | PIK3CD      | 5293    | siRNA6 | SI04436334 |                             |                                 | CACGGGCACTGTGCGAGTAA         |

| TABLE S1 (HUMAN siRNA) |        |                |          |             |         |        |            |                             |                                 |                              |
|------------------------|--------|----------------|----------|-------------|---------|--------|------------|-----------------------------|---------------------------------|------------------------------|
| Gene#                  | Name   | Plate Name     | Location | Gene Symbol | Gene ID | siRNA# | siRNA ID   | Ambion Sense siRNA Sequence | Ambion Antisense siRNA Sequence | Qiagen siRNA target sequence |
| 79                     | PIK3CG | Ambion_Plate 2 | E4       | PIK3CG      | 5294    | siRNA1 | s10532     | GCUUUAGAGUCCAUUGAtt         | UCAUUGGAACUCUAAAGCtt            |                              |
| 79                     | PIK3CG | Ambion_Plate 2 | I9       | PIK3CG      | 5294    | siRNA2 | s10533     | GCUGCACGACUUUACCAAtt        | UUGGGUAAAGUCGUGCAGCat           |                              |
| 79                     | PIK3CG | Ambion_Plate 2 | M17      | PIK3CG      | 5294    | siRNA3 | s10534     | GUAUUCGAGAUUUUACAAtt        | UUUGUAAACUUCGUAUUCtt            |                              |
| 79                     | PIK3CG | Qiagen_Plate 2 | E4       | PIK3CG      | 5294    | siRNA4 | SI00605843 |                             |                                 | CACCTTACTCTATAACTCAA         |
| 79                     | PIK3CG | Qiagen_Plate 2 | I9       | PIK3CG      | 5294    | siRNA5 | SI00605836 |                             |                                 | ATCGAAGTTTGACAGACAAA         |
| 79                     | PIK3CG | Qiagen_Plate 2 | M17      | PIK3CG      | 5294    | siRNA6 | SI04436341 |                             |                                 | CAAACCTCACGCTGCAACTAA        |
| 80                     | PIK3R1 | Ambion_Plate 2 | F4       | PIK3R1      | 5295    | siRNA1 | s10535     | CUACCGAAUGAAUCUCUAtt        | UAGAGAUUCAUUCGGUAGtg            |                              |
| 80                     | PIK3R1 | Ambion_Plate 2 | J9       | PIK3R1      | 5295    | siRNA2 | s10536     | CAACGGUUGAAUACAAtt          | AUUGUUUUUCAUACCGUUGtt           |                              |
| 80                     | PIK3R1 | Ambion_Plate 2 | N17      | PIK3R1      | 5295    | siRNA3 | s10537     | GCAGCUGAGAUUCGAGAAAtt       | UUUCUCGAUACUCAGCUGCct           |                              |
| 80                     | PIK3R1 | Qiagen_Plate 2 | F4       | PIK3R1      | 5295    | siRNA4 | SI02254112 |                             |                                 | TAGCTGGTTATGAAGTAGTAA        |
| 80                     | PIK3R1 | Qiagen_Plate 2 | J9       | PIK3R1      | 5295    | siRNA5 | SI0225405  |                             |                                 | CAGCATTAAACCAGACCTTAT        |
| 80                     | PIK3R1 | Qiagen_Plate 2 | N17      | PIK3R1      | 5295    | siRNA6 | SI04379417 |                             |                                 | CACTACCGGAATGAATCTCTA        |
| 81                     | PIK3R2 | Ambion_Plate 2 | G4       | PIK3R2      | 5296    | siRNA1 | s10538     | GCAUUGCCGAGAUCCAUGAtt       | UCAUGGAUCUCGGCAUUGCgg           |                              |
| 81                     | PIK3R2 | Ambion_Plate 2 | K9       | PIK3R2      | 5296    | siRNA2 | s10539     | GCAAGAUCCGAGACAGUAtt        | UACUGGUCUCGGAUUUUGCgc           |                              |
| 81                     | PIK3R2 | Ambion_Plate 2 | C18      | PIK3R2      | 5296    | siRNA3 | s10540     | GGAAAGCGGGGAACAAUAtt        | UUUUUUUUUUUUUUUUUcctg           |                              |
| 81                     | PIK3R2 | Qiagen_Plate 2 | G4       | PIK3R2      | 5296    | siRNA4 | SI00287539 |                             |                                 | TTGGTACGTGGGCAAGATCAA        |
| 81                     | PIK3R2 | Qiagen_Plate 2 | K9       | PIK3R2      | 5296    | siRNA5 | SI00287532 |                             |                                 | CCGGAGTATGACCGCTTTA          |
| 81                     | PIK3R2 | Qiagen_Plate 2 | C18      | PIK3R2      | 5296    | siRNA6 | SI04378990 |                             |                                 | AAGGATCCTGCTGAATCCGA         |
| 82                     | PIK3R3 | Ambion_Plate 2 | H4       | PIK3R3      | 8503    | siRNA1 | s16151     | GGUAUCAUUCGAGUACAAtt        | UUGUACUCGAUUGAUUUCctc           |                              |
| 82                     | PIK3R3 | Ambion_Plate 2 | L9       | PIK3R3      | 8503    | siRNA2 | s229780    | GGACUGCAAUAGAGCUUAtt        | AAAGCUUCUUAUUGCAGUCctc          |                              |
| 82                     | PIK3R3 | Ambion_Plate 2 | D18      | PIK3R3      | 8503    | siRNA3 | s229781    | CCCUAUUCGACAGAACUGAtt       | UCAGUUUCUGCGAAUAGGGca           |                              |
| 82                     | PIK3R3 | Qiagen_Plate 2 | H4       | PIK3R3      | 8503    | siRNA4 | SI0277446  |                             |                                 | ATGAATTATGATAAATTGAAA        |
| 82                     | PIK3R3 | Qiagen_Plate 2 | L9       | PIK3R3      | 8503    | siRNA5 | SI0277439  |                             |                                 | CAGGGCTGTAGTATTAGTAA         |
| 82                     | PIK3R3 | Qiagen_Plate 2 | D18      | PIK3R3      | 8503    | siRNA6 | SI0277432  |                             |                                 | AAGGGAGGCAATAAAGTTA          |
| 83                     | PIK3R5 | Ambion_Plate 2 | I4       | PIK3R5      | 23533   | siRNA1 | s24027     | GGGCAGAAGUUAUCAGGAtt        | UCCUGAUGAACUUCUGCCcag           |                              |
| 83                     | PIK3R5 | Ambion_Plate 2 | M9       | PIK3R5      | 23533   | siRNA2 | s24028     | GCACUUCGAGAUACAAGUAtt       | ACUUUGAUCUGCGAUGUGCta           |                              |
| 83                     | PIK3R5 | Ambion_Plate 2 | E18      | PIK3R5      | 23533   | siRNA3 | s24029     | GGCUGUUCUCUAACACUAtt        | UAGUGUUAGAGGAACAGCCctc          |                              |
| 83                     | PIK3R5 | Qiagen_Plate 2 | I4       | PIK3R5      | 23533   | siRNA4 | SI04954110 |                             |                                 | TAGCAGCTCAGTTCTAGCTAA        |
| 83                     | PIK3R5 | Qiagen_Plate 2 | M9       | PIK3R5      | 23533   | siRNA5 | SI00104636 |                             |                                 | CAGGATCTATAAATCTTCAA         |
| 83                     | PIK3R5 | Qiagen_Plate 2 | E18      | PIK3R5      | 23533   | siRNA6 | SI00104629 |                             |                                 | TAGGATCCTTCTAGAAAGGAA        |
| 84                     | RAC1   | Ambion_Plate 2 | J4       | RAC1        | 5879    | siRNA1 | s11711     | CUACUGUCUUUGACAUAUAtt       | UAUUUGUCAAAAGACAGUAGgg          |                              |
| 84                     | RAC1   | Ambion_Plate 2 | N9       | RAC1        | 5879    | siRNA2 | s11712     | ACAGAUUUUUUUUUUCAUAtt       | UAUGGAAAAUUUUUAUCUGUaa          |                              |
| 84                     | RAC1   | Ambion_Plate 2 | F18      | RAC1        | 5879    | siRNA3 | s11713     | GGAACUAAACUUGAUUCUAtt       | UAAGAUAAGUUUAGUUCc              |                              |
| 84                     | RAC1   | Qiagen_Plate 2 | J4       | RAC1        | 5879    | siRNA4 | SI02655051 |                             |                                 | ATGCAATTTCTGGAGATATA         |
| 84                     | RAC1   | Qiagen_Plate 2 | N9       | RAC1        | 5879    | siRNA5 | SI03065531 |                             |                                 | CAGCACGTGTTCCCGACATAA        |
| 84                     | RAC1   | Qiagen_Plate 2 | F18      | RAC1        | 5879    | siRNA6 | SI03040884 |                             |                                 | ACGAAGTGGAGATTACACTA         |
| 85                     | IRF5   | Ambion_Plate 2 | K4       | IRF5        | 3663    | siRNA1 | s7513      | AGCUGAUAGUUAUCGGCUAtt       | UAGCCGGAUACUUCAGCUGga           |                              |
| 85                     | IRF5   | Ambion_Plate 2 | C10      | IRF5        | 3663    | siRNA2 | s7514      | CCACCUUCGAGAUUCUAtt         | AGAAGAUUCUGAAGGGUGtg            |                              |
| 85                     | IRF5   | Ambion_Plate 2 | G18      | IRF5        | 3663    | siRNA3 | s7515      | GGAUUACUCUUUUGGUGAtt        | UGCACAAAAGAGUAAUUCctc           |                              |
| 85                     | IRF5   | Qiagen_Plate 2 | K4       | IRF5        | 3663    | siRNA4 | SI04311762 |                             |                                 | TCAGCTGATAGTATCCGGCTA        |
| 85                     | IRF5   | Qiagen_Plate 2 | C10      | IRF5        | 3663    | siRNA5 | SI04276615 |                             |                                 | AGGGCAGTGCATGTAATCAT         |
| 85                     | IRF5   | Qiagen_Plate 2 | G18      | IRF5        | 3663    | siRNA6 | SI04253949 |                             |                                 | CTCCCTGTCTCTGAGATAAT         |
| 86                     | IRF7   | Ambion_Plate 2 | L4       | IRF7        | 3665    | siRNA1 | s7519      | CGAGCUGCACGUUCUUAUAtt       | UAUAGGAACGUGCAGCUGGgg           |                              |
| 86                     | IRF7   | Ambion_Plate 2 | D10      | IRF7        | 3665    | siRNA2 | s194563    | GUCUAAUGAGAACUCCAGAtt       | UCUGGAGUUUCUUAUAGAGctg          |                              |
| 86                     | IRF7   | Ambion_Plate 2 | H18      | IRF7        | 3665    | siRNA3 | s194564    | CCCUAGAACCCAGUCUUAUAtt      | AUUAGACUGGGUUCUAGGCgg           |                              |
| 86                     | IRF7   | Qiagen_Plate 2 | L4       | IRF7        | 3665    | siRNA4 | SI04137623 |                             |                                 | CCGCGGCCGCCAGTCTAATA         |
| 86                     | IRF7   | Qiagen_Plate 2 | D10      | IRF7        | 3665    | siRNA5 | SI03171763 |                             |                                 | CAGCGCAACAGCCTCTATGA         |
| 86                     | IRF7   | Qiagen_Plate 2 | H18      | IRF7        | 3665    | siRNA6 | SI00448693 |                             |                                 | CTGGAAGCACTTCGCGCAA          |
| 87                     | STAT1  | Ambion_Plate 2 | M4       | STAT1       | 6772    | siRNA1 | s277       | CCUACGAACAUGACCCUUAUAtt     | AUAGGGUUAUGUUCGUAAGtg           |                              |
| 87                     | STAT1  | Ambion_Plate 2 | E10      | STAT1       | 6772    | siRNA2 | s278       | CGGUUGAACCCUACAGAAAtt       | UUUGUUGAGGGUUAACCCGca           |                              |
| 87                     | STAT1  | Ambion_Plate 2 | I18      | STAT1       | 6772    | siRNA3 | s279       | GGUUCACUUAUGUUGCGGAtt       | UCCGCAACUUAUGUAAGCag            |                              |
| 87                     | STAT1  | Qiagen_Plate 2 | M4       | STAT1       | 6772    | siRNA4 | SI02662884 |                             |                                 | CCAGATGTCTATGATCATTTA        |
| 87                     | STAT1  | Qiagen_Plate 2 | E10      | STAT1       | 6772    | siRNA5 | SI02662324 |                             |                                 | CAGAAAGAGCTTGACAGTAAA        |
| 87                     | STAT1  | Qiagen_Plate 2 | I18      | STAT1       | 6772    | siRNA6 | SI04950960 |                             |                                 | CTGCAGAACTGGTTCACTATA        |
| 88                     | Fos    | Ambion_Plate 2 | N4       | FOS         | 2353    | siRNA1 | s5339      | CACUCCAAGCGGAGACAGAtt       | UCUGUCUCCGCUUGGAGUGta           |                              |
| 88                     | Fos    | Ambion_Plate 2 | F10      | FOS         | 2353    | siRNA2 | s5340      | CUUUCUUCGUUCUACCUUAtt       | UAGGUGAAGACGAAGGAAGac           |                              |
| 88                     | Fos    | Ambion_Plate 2 | J18      | FOS         | 2353    | siRNA3 | s5341      | GAAUCCGAAGGGAAGGAAtt        | UUCCUUUCCUUCGGAUUctc            |                              |
| 88                     | Fos    | Qiagen_Plate 2 | N4       | FOS         | 2353    | siRNA4 | SI02781464 |                             |                                 | TGGGTTCTATTGGAATTAA          |
| 88                     | Fos    | Qiagen_Plate 2 | F10      | FOS         | 2353    | siRNA5 | SI02781429 |                             |                                 | GACCAATATTACTAAGAAA          |
| 88                     | Fos    | Qiagen_Plate 2 | J18      | FOS         | 2353    | siRNA6 | SI03091844 |                             |                                 | CTCGGGCTTCAACGACAGCTA        |
| 89                     | Jun    | Ambion_Plate 2 | C5       | JUN         | 3725    | siRNA1 | s7658      | GGCACAGCUAAACAGAAAtt        | UUUCUGUUUAAGCUGUGCCac           |                              |
| 89                     | Jun    | Ambion_Plate 2 | G10      | JUN         | 3725    | siRNA2 | s7659      | CCAAGUGCCGAAAAGGAAtt        | UUCCUUUUUCGGCAUUGGag            |                              |
| 89                     | Jun    | Ambion_Plate 2 | K18      | JUN         | 3725    | siRNA3 | s7660      | GGAUCAAGCGGAGAGGAAtt        | UUCCUUCUCCGUUGAUUCgc            |                              |
| 89                     | Jun    | Qiagen_Plate 2 | C5       | JUN         | 3725    | siRNA4 | SI00300580 |                             |                                 | AAGAAGCTGACAGATGAGCAG        |
| 89                     | Jun    | Qiagen_Plate 2 | G10      | JUN         | 3725    | siRNA5 | SI03077599 |                             |                                 | CCCGAGCTGGAGCGCTGATA         |
| 89                     | Jun    | Qiagen_Plate 2 | K18      | JUN         | 3725    | siRNA6 | SI00034678 |                             |                                 | CGCGCGGAGTCGACAAGTAA         |
| 90                     | PYK2   | Ambion_Plate 2 | D5       | PTK2B       | 2185    | siRNA1 | s5007      | GUAUGUGGUCCGAAUUGUAtt       | UACGAUUCAGGACCACAUctt           |                              |
| 90                     | PYK2   | Ambion_Plate 2 | H10      | PTK2B       | 2185    | siRNA2 | s5006      | GUGAAGAUUGGUCCUGAAtt        | UUACAGGACCACAUUCUACgg           |                              |
| 90                     | PYK2   | Ambion_Plate 2 | L18      | PTK2B       | 2185    | siRNA3 | s5008      | GGAUCAUCAUGAAUUGUAtt        | UACAAUUCCAUGAUGAUCcag           |                              |
| 90                     | PYK2   | Qiagen_Plate 2 | D5       | PTK2B       | 2185    | siRNA4 | SI0225328  |                             |                                 | CAGGAGAAGCTTAAAGCCAAA        |
| 90                     | PYK2   | Qiagen_Plate 2 | H10      | PTK2B       | 2185    | siRNA5 | SI0225321  |                             |                                 | AAGCTGATGGCATCATTGAA         |
| 90                     | PYK2   | Qiagen_Plate 2 | L18      | PTK2B       | 2185    | siRNA6 | SI02649031 |                             |                                 | CTGGCATTCTGTACAGTGA          |
| 91                     | ETS1   | Ambion_Plate 2 | F5       | ETS1        | 2113    | siRNA1 | s4847      | GGACUUCUUUAGAAAGCAUAtt      | UAUGCUUUCAAAGAGUCctg            |                              |
| 91                     | ETS1   | Ambion_Plate 2 | J10      | ETS1        | 2113    | siRNA2 | s4848      | GCAUUAAAAGCUUUUUCAtt        | UGAAAGUAGCUUUUAUUGctt           |                              |
| 91                     | ETS1   | Ambion_Plate 2 | N18      | ETS1        | 2113    | siRNA3 | s4849      | CCGUCAAAGGUGUAGACUAtt       | AAGUCUACACCUUUCAGGCctg          |                              |
| 91                     | ETS1   | Qiagen_Plate 2 | F5       | ETS1        | 2113    | siRNA4 | SI05181603 |                             |                                 | TCCACCGTCTCATTAAATTT         |
| 91                     | ETS1   | Qiagen_Plate 2 | J10      | ETS1        | 2113    | siRNA5 | SI05147842 |                             |                                 | CACGACCTAAGTTGAGAGTT         |
| 91                     | ETS1   | Qiagen_Plate 2 | N18      | ETS1        | 2113    | siRNA6 | SI03068632 |                             |                                 | CAGCTCGACTCAGAGGACTA         |

| TABLE S1 (HUMAN siRNA) |        |                |          |             |         |        |            |                             |                                 |                              |
|------------------------|--------|----------------|----------|-------------|---------|--------|------------|-----------------------------|---------------------------------|------------------------------|
| Gene#                  | Name   | Plate Name     | Location | Gene Symbol | Gene ID | siRNA# | siRNA ID   | Ambion Sense siRNA Sequence | Ambion Antisense siRNA Sequence | Qiagen siRNA target sequence |
| 92                     | ELK1   | Ambion_Plate 2 | G5       | ELK1        | 2002    | siRNA1 | s4632      | GGCCUUGCGGUACUACUAtt        | AUAGUAGUACCGCAAGGCCg            |                              |
| 92                     | ELK1   | Ambion_Plate 2 | K10      | ELK1        | 2002    | siRNA2 | s4633      | GAAACAUAGUUCAACUGAAtt       | UUCAGUUGAACUUAUUUc              |                              |
| 92                     | ELK1   | Ambion_Plate 2 | C19      | ELK1        | 2002    | siRNA3 | s4634      | CAUCAUCUCCGAGCUCUAtt        | UGAAGUCCAGGAGAUGGtg             |                              |
| 92                     | ELK1   | Qiagen_Plate 2 | G5       | ELK1        | 2002    | siRNA4 | SI02662506 |                             |                                 | AGGGAGTCATCTTCTCTATA         |
| 92                     | ELK1   | Qiagen_Plate 2 | K10      | ELK1        | 2002    | siRNA5 | SI00300146 |                             |                                 | CTGCTGAGAGAGCAAGGCAAT        |
| 92                     | ELK1   | Qiagen_Plate 2 | C19      | ELK1        | 2002    | siRNA6 | SI00074081 |                             |                                 | GAGAAACATAGTTCAACTGAA        |
| 93                     | ELK4   | Ambion_Plate 2 | H5       | ELK4        | 2005    | siRNA1 | s4638      | CUCAGAUACUUAUUGUAtt         | UUACAUAAUAGUACUGAGgg            |                              |
| 93                     | ELK4   | Ambion_Plate 2 | L10      | ELK4        | 2005    | siRNA2 | s4639      | CUAACGUAAUGACUGCUUAtt       | AAAGCAGUACUACGUUAGg             |                              |
| 93                     | ELK4   | Ambion_Plate 2 | D19      | ELK4        | 2005    | siRNA3 | s4640      | GGACAAGUAAUUAUUUAtt         | UGAAUUUUUUACUUGUCct             |                              |
| 93                     | ELK4   | Qiagen_Plate 2 | H5       | ELK4        | 2005    | siRNA4 | SI03104101 |                             |                                 | GAGGGTACTGTGAAAGTTTA         |
| 93                     | ELK4   | Qiagen_Plate 2 | L10      | ELK4        | 2005    | siRNA5 | SI03079328 |                             |                                 | CCCTCAGACTATTATGTA           |
| 93                     | ELK4   | Qiagen_Plate 2 | D19      | ELK4        | 2005    | siRNA6 | SI03073861 |                             |                                 | CATGATCTGTGGACCTCTAA         |
| 94                     | SP1    | Ambion_Plate 2 | J5       | SP1         | 6667    | siRNA1 | s13318     | GCAACAUUGGAAUUUAUAtt        | UUCAUUUUCCAUUGUUGctg            |                              |
| 94                     | SP1    | Ambion_Plate 2 | M10      | SP1         | 6667    | siRNA2 | s13319     | GGCAGACUUUACACUCUAtt        | UGAGUUUUAAGGUCUGCCct            |                              |
| 94                     | SP1    | Ambion_Plate 2 | E19      | SP1         | 6667    | siRNA3 | s13320     | CCACAAGCCAAACAAUAtt         | UGAUUUUUUGGCUUGUGGgt            |                              |
| 94                     | SP1    | Qiagen_Plate 2 | J5       | SP1         | 6667    | siRNA4 | SI02648072 |                             |                                 | CTAGGACGCAATAAATTTATA        |
| 94                     | SP1    | Qiagen_Plate 2 | M10      | SP1         | 6667    | siRNA5 | SI02648065 |                             |                                 | CAGCAAGTCTGACAGGACTA         |
| 94                     | SP1    | Qiagen_Plate 2 | E19      | SP1         | 6667    | siRNA6 | SI00150990 |                             |                                 | TCCAGAAAGTATATACTGAA         |
| 95                     | EGR1   | Ambion_Plate 2 | J5       | EGR1        | 1958    | siRNA1 | s4538      | CAACGACAGCAGUCCAUAtt        | AAUGGACUGCUGUCGUUGga            |                              |
| 95                     | EGR1   | Ambion_Plate 2 | N10      | EGR1        | 1958    | siRNA2 | s4537      | GGACAUAGCAGCAACCUUAtt       | AAAGGUUCUGUCAUGUCGga            |                              |
| 95                     | EGR1   | Ambion_Plate 2 | F19      | EGR1        | 1958    | siRNA3 | s4539      | CCAUGGACAACUACCUCUAtt       | UUAGGGUAGUUGUCAUGGtg            |                              |
| 95                     | EGR1   | Qiagen_Plate 2 | J5       | EGR1        | 1958    | siRNA4 | SI03078950 |                             |                                 | CCCGTGGTGGCCACCACGTA         |
| 95                     | EGR1   | Qiagen_Plate 2 | N10      | EGR1        | 1958    | siRNA5 | SI03069108 |                             |                                 | CAGGACAAATGAAATTTGCTA        |
| 95                     | EGR1   | Qiagen_Plate 2 | F19      | EGR1        | 1958    | siRNA6 | SI03052511 |                             |                                 | CAAACCAATGGTGATCCTCTA        |
| 96                     | EGR2   | Ambion_Plate 2 | K5       | EGR2        | 1959    | siRNA1 | s4540      | GAUCCACCUGAGACAGAAAtt       | UUUCUGUCUCAGGUGGAUctt           |                              |
| 96                     | EGR2   | Ambion_Plate 2 | C14      | EGR2        | 1959    | siRNA2 | s4541      | CACUCUCUACAUCUGUAAtt        | UUACGGAUUUGAGAGAGUGga           |                              |
| 96                     | EGR2   | Ambion_Plate 2 | G19      | EGR2        | 1959    | siRNA3 | s4542      | CAUCUUCCAAUUGCCGAAtt        | UUCGGCAUUGGAAAGAUGtg            |                              |
| 96                     | EGR2   | Qiagen_Plate 2 | K5       | EGR2        | 1959    | siRNA4 | SI04948762 |                             |                                 | CACCTAGAAACCAGACCTTCA        |
| 96                     | EGR2   | Qiagen_Plate 2 | C14      | EGR2        | 1959    | siRNA5 | SI04948755 |                             |                                 | CTGGATGTCAGAGTTGATCTA        |
| 96                     | EGR2   | Qiagen_Plate 2 | G19      | EGR2        | 1959    | siRNA6 | SI00008785 |                             |                                 | TCCACTCTACAATCCGTAA          |
| 97                     | ATF2   | Ambion_Plate 2 | L5       | ATF2        | 1386    | siRNA1 | s3492      | GUGAUACUGUCAAAGGUCAtt       | UGACUUUUGACAGUACACca            |                              |
| 97                     | ATF2   | Ambion_Plate 2 | D14      | ATF2        | 1386    | siRNA2 | s3493      | CAAGUACUGUAAUCACCCAtt       | UGGGUAGUUAACAGUACUUGg           |                              |
| 97                     | ATF2   | Ambion_Plate 2 | H19      | ATF2        | 1386    | siRNA3 | s3494      | GACAUUUCAGUCCGAGUAtt        | UACUCGGCAGUAAAUGUctt            |                              |
| 97                     | ATF2   | Qiagen_Plate 2 | L5       | ATF2        | 1386    | siRNA4 | SI02780309 |                             |                                 | CGCGGGTACCAGAAAGGATCA        |
| 97                     | ATF2   | Qiagen_Plate 2 | D14      | ATF2        | 1386    | siRNA5 | SI03095946 |                             |                                 | CTGCTCTTACAGATCTGTTA         |
| 97                     | ATF2   | Qiagen_Plate 2 | H19      | ATF2        | 1386    | siRNA6 | SI00305886 |                             |                                 | TGCGAAATCTGTGGTTGTA          |
| 98                     | ATF7   | Ambion_Plate 2 | M5       | ATF7        | 11016   | siRNA1 | s21693     | CCGAUACAUCGUAUGUAAtt        | UUACAUGCAUUGUUAUCGGca           |                              |
| 98                     | ATF7   | Ambion_Plate 2 | E14      | ATF7        | 11016   | siRNA2 | s21694     | CAGUCACUGCACUACAGAAAtt      | UUCUGUAGUGCAGUGACUGgg           |                              |
| 98                     | ATF7   | Ambion_Plate 2 | I19      | ATF7        | 11016   | siRNA3 | s21695     | CACCAGACAUAUUAUUAAtt        | UUGAUUUUGAUGUCUGGUGtg           |                              |
| 98                     | ATF7   | Qiagen_Plate 2 | M5       | ATF7        | 11016   | siRNA4 | SI04952584 |                             |                                 | CAGTAGCAGCCTTGCCTTAA         |
| 98                     | ATF7   | Qiagen_Plate 2 | E14      | ATF7        | 11016   | siRNA5 | SI04374909 |                             |                                 | AACAGTACTGTAGCTCATA          |
| 98                     | ATF7   | Qiagen_Plate 2 | I19      | ATF7        | 11016   | siRNA6 | SI04247264 |                             |                                 | CAGCCGAACTGACTCAGTCA         |
| 99                     | CBP    | Ambion_Plate 2 | N5       | CREBBP      | 1387    | siRNA1 | s3495      | GAAUUCUUCCAUAUCGAAtt        | UUCGAUUGGGAAGAUUUCag            |                              |
| 99                     | CBP    | Ambion_Plate 2 | F14      | CREBBP      | 1387    | siRNA2 | s3497      | CAGCUAUCAGAAUAGGUAtt        | AUACCUAUUCUGAUGCUgta            |                              |
| 99                     | CBP    | Ambion_Plate 2 | J19      | CREBBP      | 1387    | siRNA3 | s3496      | GGUAUUGCUGUGGACGCAtt        | UGCGUCCACAGCAUUAUCCaa           |                              |
| 99                     | CBP    | Qiagen_Plate 2 | N5       | CREBBP      | 1387    | siRNA4 | SI02633099 |                             |                                 | CTGCCAGTGAATCGCATGCAA        |
| 99                     | CBP    | Qiagen_Plate 2 | F14      | CREBBP      | 1387    | siRNA5 | SI02633092 |                             |                                 | CCCGATCTGTGTAATCCAAA         |
| 99                     | CBP    | Qiagen_Plate 2 | J19      | CREBBP      | 1387    | siRNA6 | SI02633085 |                             |                                 | AACGGAGTGCCTTTACATA          |
| 100                    | p300   | Ambion_Plate 2 | C6       | EP300       | 2033    | siRNA1 | s4695      | GGACUACCUAUAAGUAAtt         | UUACUUGAUGGGUAGUCCaa            |                              |
| 100                    | p300   | Ambion_Plate 2 | G14      | EP300       | 2033    | siRNA2 | s4696      | CCACUACUGGAAUUCGGAAtt       | UUCGGAAUUCAGUAGUGGat            |                              |
| 100                    | p300   | Ambion_Plate 2 | K19      | EP300       | 2033    | siRNA3 | s4697      | GCCUGGUUAUUAACCGGAtt        | UCCGGUUAUUAACCGGat              |                              |
| 100                    | p300   | Qiagen_Plate 2 | C6       | EP300       | 2033    | siRNA4 | SI03078761 |                             |                                 | CCCGTGAACCTCTCTATAAT         |
| 100                    | p300   | Qiagen_Plate 2 | G14      | EP300       | 2033    | siRNA5 | SI03038259 |                             |                                 | ACCAAGGGTTGCAACGGAAA         |
| 100                    | p300   | Qiagen_Plate 2 | K19      | EP300       | 2033    | siRNA6 | SI02626267 |                             |                                 | TTGGACTACCCTATCAAGTAA        |
| 101                    | ISGF3G | Ambion_Plate 2 | D6       | IRF9        | 10379   | siRNA1 | s20290     | CACAGAAUCUUAUCACAGUAtt      | ACUGUGAUUAGAUUCUGUGga           |                              |
| 101                    | ISGF3G | Ambion_Plate 2 | H14      | IRF9        | 10379   | siRNA2 | s20291     | CAUAUUUUAAGGGAAAGUAtt       | UACUUCCUUUAUUAUUUgcc            |                              |
| 101                    | ISGF3G | Ambion_Plate 2 | L19      | IRF9        | 10379   | siRNA3 | s20292     | GCUAAGACCAUUGUCCGAtt        | UCCGGAACAUGGUCUAGCtg            |                              |
| 101                    | ISGF3G | Qiagen_Plate 2 | D6       | IRF9        | 10379   | siRNA4 | SI03037650 |                             |                                 | ACAGAATCTTATCACAGTGAA        |
| 101                    | ISGF3G | Qiagen_Plate 2 | H14      | IRF9        | 10379   | siRNA5 | SI00084378 |                             |                                 | CAAGGCCTGGCAATATTTAA         |
| 101                    | ISGF3G | Qiagen_Plate 2 | L19      | IRF9        | 10379   | siRNA6 | SI00084371 |                             |                                 | CAACAAGAGTCTGAAATTTAA        |
| 102                    | ELF4   | Ambion_Plate 2 | E6       | ELF4        | 2000    | siRNA1 | s4626      | GCGGAAGUCUACUCAUAtt         | UAUUGAGUAAGACUUCGCGgg           |                              |
| 102                    | ELF4   | Ambion_Plate 2 | I14      | ELF4        | 2000    | siRNA2 | s4627      | CCAUCUACUGUGGGAGUAtt        | AACUCCACAGUAGAUUGtg             |                              |
| 102                    | ELF4   | Ambion_Plate 2 | M19      | ELF4        | 2000    | siRNA3 | s4628      | GCGAUUCCUGGAUGAGAAtt        | UUCUCAUCCAGGAUUAUGCtg           |                              |
| 102                    | ELF4   | Qiagen_Plate 2 | E6       | ELF4        | 2000    | siRNA4 | SI04339076 |                             |                                 | CAGACGGGACCTTGTGCATGA        |
| 102                    | ELF4   | Qiagen_Plate 2 | I14      | ELF4        | 2000    | siRNA5 | SI04327946 |                             |                                 | AACCGGGAAGTCTTACTCAA         |
| 102                    | ELF4   | Qiagen_Plate 2 | M19      | ELF4        | 2000    | siRNA6 | SI00378490 |                             |                                 | AAGGACCTGGTGGTATTGAA         |
| 103                    | IFNAR1 | Ambion_Plate 2 | F6       | IFNAR1      | 3454    | siRNA1 | s783       | CUAUACUGGUGCUCCAAAtt        | UUUUGAGCACCGAAUUAUg             |                              |
| 103                    | IFNAR1 | Ambion_Plate 2 | J14      | IFNAR1      | 3454    | siRNA2 | s784       | CCAUUUCGAAAGCUCAGAtt        | UCUGAGCUUUGCGAAUUGtg            |                              |
| 103                    | IFNAR1 | Ambion_Plate 2 | N19      | IFNAR1      | 3454    | siRNA3 | s782       | GGUAUAGAGGUUGACUCAUAtt      | AAUGAGUCAACCUCAUCCat            |                              |
| 103                    | IFNAR1 | Qiagen_Plate 2 | F6       | IFNAR1      | 3454    | siRNA4 | SI03065104 |                             |                                 | CAGATTGGTCTCCAGAAAGTA        |
| 103                    | IFNAR1 | Qiagen_Plate 2 | J14      | IFNAR1      | 3454    | siRNA5 | SI00013195 |                             |                                 | TGCCAGAAAGATGATCCCTAA        |
| 103                    | IFNAR1 | Qiagen_Plate 2 | N19      | IFNAR1      | 3454    | siRNA6 | SI00013181 |                             |                                 | CAGGGACCTTATTATTACATA        |
| 104                    | IFNAR2 | Ambion_Plate 2 | G6       | IFNAR2      | 3455    | siRNA1 | s7184      | GAGUGGAAUUAUACCUUAtt        | AUAGGUGAAUUAUCCACUat            |                              |
| 104                    | IFNAR2 | Ambion_Plate 2 | K14      | IFNAR2      | 3455    | siRNA2 | s7185      | GAACUGUGCAAUACCAAtt         | UGUGGUUUUGCACAGUUCct            |                              |
| 104                    | IFNAR2 | Ambion_Plate 2 | C20      | IFNAR2      | 3455    | siRNA3 | s7186      | CCUAUUAUUGACAAGUAtt         | AACUUGUCAUUAUAGGtg              |                              |
| 104                    | IFNAR2 | Qiagen_Plate 2 | G6       | IFNAR2      | 3455    | siRNA4 | SI02780575 |                             |                                 | CACAGTGTGAGCAGCAGTA          |
| 104                    | IFNAR2 | Qiagen_Plate 2 | K14      | IFNAR2      | 3455    | siRNA5 | SI04949385 |                             |                                 | CCGTCCATCTTATCATGGGA         |
| 104                    | IFNAR2 | Qiagen_Plate 2 | C20      | IFNAR2      | 3455    | siRNA6 | SI03031035 |                             |                                 | AAGAAGCATAAACCCGAAATA        |





| TABLE S1 (HUMAN siRNA) |        |                |          |             |         |        |            |                             |                                 |                              |
|------------------------|--------|----------------|----------|-------------|---------|--------|------------|-----------------------------|---------------------------------|------------------------------|
| Gene#                  | Name   | Plate Name     | Location | Gene Symbol | Gene ID | siRNA# | siRNA ID   | Ambion Sense siRNA Sequence | Ambion Antisense siRNA Sequence | Qiagen siRNA target sequence |
| 118                    | IRAK3  | Ambion_Plate 2 | J7       | IRAK3       | 11213   | siRNA1 | s22133     | GAGAGAUUUUGAGGUUAtt         | UAUACCUCAAAAUCUCUct             |                              |
| 118                    | IRAK3  | Ambion_Plate 2 | N15      | IRAK3       | 11213   | siRNA2 | s22134     | GUAGAGUAGUUGUAGUAtt         | UCAUCUAAACUACUCUACat            |                              |
| 118                    | IRAK3  | Ambion_Plate 2 | F21      | IRAK3       | 11213   | siRNA3 | s22135     | GGUUGUUCGUCAUUAUGAAtt       | UUCAAUUGACGAACAUCcag            |                              |
| 118                    | IRAK3  | Qiagen_Plate 2 | J7       | IRAK3       | 11213   | siRNA4 | SI0224278  |                             |                                 | CACATTCGAATCGGTATATTA        |
| 118                    | IRAK3  | Qiagen_Plate 2 | N15      | IRAK3       | 11213   | siRNA5 | SI04952724 |                             |                                 | TGGGTGTATTAATAGCGTTA         |
| 118                    | IRAK3  | Qiagen_Plate 2 | F21      | IRAK3       | 11213   | siRNA6 | SI04438875 |                             |                                 | CTGCGGGATCTCCTTAGAGAA        |
| 119                    | SHP1   | Ambion_Plate 2 | K7       | PTPN6       | 5777    | siRNA1 | s662       | CCCAUUAUCGGAUCCAGAAtt       | UUCUGGAUCCGAAUUGGGtc            |                              |
| 119                    | SHP1   | Ambion_Plate 2 | C16      | PTPN6       | 5777    | siRNA2 | s663       | GAACCGCUACAAGAAUAtt         | AAUGUUCUUGUAGCGGUUct            |                              |
| 119                    | SHP1   | Ambion_Plate 2 | G21      | PTPN6       | 5777    | siRNA3 | s664       | ACCUCUCCUGACCCUGUAtt        | UACAGGGUCAGGGAGAGUgg            |                              |
| 119                    | SHP1   | Qiagen_Plate 2 | K7       | PTPN6       | 5777    | siRNA4 | SI02658733 |                             |                                 | TAGGCCCTGATGAGAACGCTA        |
| 119                    | SHP1   | Qiagen_Plate 2 | C16      | PTPN6       | 5777    | siRNA5 | SI02658726 |                             |                                 | CCGGAACAAATCGTCCATA          |
| 119                    | SHP1   | Qiagen_Plate 2 | G21      | PTPN6       | 5777    | siRNA6 | SI04950407 |                             |                                 | CAAGGAGGATGTGTATGAGAA        |
| 120                    | Cyld   | Ambion_Plate 2 | L7       | CYLD        | 1540    | siRNA1 | s590       | GAAUGGCUUUUAUCAAtt          | UGUUGAUAAAAGACCAUUCta           |                              |
| 120                    | Cyld   | Ambion_Plate 2 | D16      | CYLD        | 1540    | siRNA2 | s591       | GCUUUGUAGUUUUGCGUAtt        | ACACGCAAAACUACAAGGctg           |                              |
| 120                    | Cyld   | Ambion_Plate 2 | H21      | CYLD        | 1540    | siRNA3 | s592       | GAUUGUUAUCUUAUCAAtt         | UUUGUAGAAGUACAACUctt            |                              |
| 120                    | Cyld   | Qiagen_Plate 2 | L7       | CYLD        | 1540    | siRNA4 | SI03056949 |                             |                                 | CACCAAGATGCCAATACCAA         |
| 120                    | Cyld   | Qiagen_Plate 2 | D16      | CYLD        | 1540    | siRNA5 | SI00110096 |                             |                                 | AAGGTTTCATCAGTCATAATA        |
| 120                    | Cyld   | Qiagen_Plate 2 | H21      | CYLD        | 1540    | siRNA6 | SI00110089 |                             |                                 | AAAGAACGATGTAGAATATTA        |
| 121                    | A20    | Ambion_Plate 2 | M7       | TNFAIP3     | 7128    | siRNA1 | s14259     | CAAAGUUGGAUGAAGCUAAtt       | UUAGCUUCAUCCAACUUcg             |                              |
| 121                    | A20    | Ambion_Plate 2 | E16      | TNFAIP3     | 7128    | siRNA2 | s14260     | GGUUGUUAACAGGACAUAtt        | AAAUGUCCUGGUAACAUctg            |                              |
| 121                    | A20    | Ambion_Plate 2 | I21      | TNFAIP3     | 7128    | siRNA3 | s14261     | CAACGGCUACUGCAAGAAAtt       | UUCGUUGCAGUAGCCGUUgca           |                              |
| 121                    | A20    | Qiagen_Plate 2 | M7       | TNFAIP3     | 7128    | siRNA4 | SI02637166 |                             |                                 | CAGCCTTACTCATACTATTA         |
| 121                    | A20    | Qiagen_Plate 2 | E16      | TNFAIP3     | 7128    | siRNA5 | SI00087010 |                             |                                 | CTCGGTATGACAGCCATCAT         |
| 121                    | A20    | Qiagen_Plate 2 | I21      | TNFAIP3     | 7128    | siRNA6 | SI00087003 |                             |                                 | CAGATGTATGGCTAACCGGAA        |
| 122                    | DUSP2  | Ambion_Plate 2 | N7       | DUSP2       | 1844    | siRNA1 | s4366      | GUCCGACUCUGUCUGUAtt         | UCAGAGCAGAUCCGGACag             |                              |
| 122                    | DUSP2  | Ambion_Plate 2 | F16      | DUSP2       | 1844    | siRNA2 | s4367      | ACUUAAGCUCUUAUUAUAtt        | UAAAUAUAAAGUGCUAAGUtt           |                              |
| 122                    | DUSP2  | Ambion_Plate 2 | J21      | DUSP2       | 1844    | siRNA3 | s4368      | GGCCUUUCCGCUACAAGAtt        | UCUUGUAGCGGAAAGGCCct            |                              |
| 122                    | DUSP2  | Qiagen_Plate 2 | N7       | DUSP2       | 1844    | siRNA4 | SI04892692 |                             |                                 | AACATTGAGATATGTCAATA         |
| 122                    | DUSP2  | Qiagen_Plate 2 | F16      | DUSP2       | 1844    | siRNA5 | SI03083829 |                             |                                 | CGAGGCCCTTACTCGTTTAA         |
| 122                    | DUSP2  | Qiagen_Plate 2 | J21      | DUSP2       | 1844    | siRNA6 | SI03025848 |                             |                                 | TTGTGCTCAGTGCATTTAA          |
| 123                    | AIP1   | Ambion_Plate 2 | C8       | DAB2IP      | 153090  | siRNA1 | s237       | CGAUCUUUCCGGUCUUAAtt        | UAUCAGACCGGAAAGAUcgtt           |                              |
| 123                    | AIP1   | Ambion_Plate 2 | G16      | DAB2IP      | 153090  | siRNA2 | s238       | GCUGUGGACUCCAACAGAtt        | UCUUGUUGGAGUCCACAGCcg           |                              |
| 123                    | AIP1   | Ambion_Plate 2 | K21      | DAB2IP      | 153090  | siRNA3 | s239       | GAGCAUGAGUGGACCAACAtt       | UGUUGGUCCACUCAUGCUcta           |                              |
| 123                    | AIP1   | Qiagen_Plate 2 | C8       | DAB2IP      | 153090  | siRNA4 | SI00359198 |                             |                                 | CACGGTCACTGTCCACTGTA         |
| 123                    | AIP1   | Qiagen_Plate 2 | G16      | DAB2IP      | 153090  | siRNA5 | SI00359191 |                             |                                 | AACGATCTTCCGGTCTGATA         |
| 123                    | AIP1   | Qiagen_Plate 2 | K21      | DAB2IP      | 153090  | siRNA6 | SI00359184 |                             |                                 | CTCGAGTTACTCGGAAGCCAA        |
| 124                    | Tollip | Ambion_Plate 2 | D8       | TOLLIP      | 54472   | siRNA1 | s29037     | GCUGUUGAUUUUAGGCACAtt       | UGUGCCUUAAAUCAAGCctc            |                              |
| 124                    | Tollip | Ambion_Plate 2 | H16      | TOLLIP      | 54472   | siRNA2 | s29038     | GACUCUUUCUUAUCUGAGAtt       | UCUCGAGAUAGAAAGAGUcCa           |                              |
| 124                    | Tollip | Ambion_Plate 2 | L21      | TOLLIP      | 54472   | siRNA3 | s29039     | GCACUGUGCAUGAUUCCGAtt       | UCGGAUUAUGACAGUGctg             |                              |
| 124                    | Tollip | Qiagen_Plate 2 | D8       | TOLLIP      | 54472   | siRNA4 | SI03091032 |                             |                                 | CTCGAGATCTCGATGAGAGA         |
| 124                    | Tollip | Qiagen_Plate 2 | H16      | TOLLIP      | 54472   | siRNA5 | SI03081470 |                             |                                 | CCGCTGGAATAAGGTATCCA         |
| 124                    | Tollip | Qiagen_Plate 2 | L21      | TOLLIP      | 54472   | siRNA6 | SI03061310 |                             |                                 | CACGGTGTACAGGCAAAGTT         |
| 125                    | MKP1   | Ambion_Plate 2 | E8       | DUSP1       | 1843    | siRNA1 | s4363      | CCACCACCGUGUUAACUAtt        | AAGUUGAACACGGUGGUGtg            |                              |
| 125                    | MKP1   | Ambion_Plate 2 | I16      | DUSP1       | 1843    | siRNA2 | s4364      | GGACUAAUCGAGUCAAGUAtt       | AGCUUGACUCGAUUAUGUCctc          |                              |
| 125                    | MKP1   | Ambion_Plate 2 | M21      | DUSP1       | 1843    | siRNA3 | s4365      | AGGCCUUUGAGUUUGUAtt         | UUCACAACUCAAGGCCucg             |                              |
| 125                    | MKP1   | Qiagen_Plate 2 | E8       | DUSP1       | 1843    | siRNA4 | SI03100048 |                             |                                 | CTGGTTCAACGAGGCCATTGA        |
| 125                    | MKP1   | Qiagen_Plate 2 | I16      | DUSP1       | 1843    | siRNA5 | SI00374822 |                             |                                 | CAGTTGTATGTTTCTGATTGA        |
| 125                    | MKP1   | Qiagen_Plate 2 | M21      | DUSP1       | 1843    | siRNA6 | SI00374815 |                             |                                 | CACGAACAGTGCCTGAGCTA         |
| 126                    | RIP3   | Ambion_Plate 2 | F8       | RIPK3       | 11035   | siRNA1 | s21740     | GGCAAGUCUGGAUAACGAAtt       | UUCGUUAUCCAGACUUGCCat           |                              |
| 126                    | RIP3   | Ambion_Plate 2 | J16      | RIPK3       | 11035   | siRNA2 | s21741     | GAACUGUUUGUUAACGUAtt        | UUACGUUAACAAACAGUUCtg           |                              |
| 126                    | RIP3   | Ambion_Plate 2 | N21      | RIPK3       | 11035   | siRNA3 | s21742     | GGAGAACCAUAGAAAACAtt        | UGGUUUUCUAGGUUUCUCcta           |                              |
| 126                    | RIP3   | Qiagen_Plate 2 | F8       | RIPK3       | 11035   | siRNA4 | SI00092813 |                             |                                 | ATGGCAAGTCTGGATAACGAA        |
| 126                    | RIP3   | Qiagen_Plate 2 | J16      | RIPK3       | 11035   | siRNA5 | SI00092806 |                             |                                 | CAGCCTGATGCTGCTGCTCAA        |
| 126                    | RIP3   | Qiagen_Plate 2 | N21      | RIPK3       | 11035   | siRNA6 | SI00092799 |                             |                                 | CACAGGGTTGGTATAATCATA        |





















| TABLE S1 (MOUSE siRNA) |        |                |          |             |         |        |            |                             |                                 |                              |
|------------------------|--------|----------------|----------|-------------|---------|--------|------------|-----------------------------|---------------------------------|------------------------------|
| Gene#                  | Name   | Plate Name     | Location | Gene Symbol | Gene ID | siRNA# | siRNA ID   | Ambion Sense siRNA Sequence | Ambion Antisense siRNA Sequence | Qiagen siRNA target sequence |
| 118                    | IRAK3  | Ambion_Plate 2 | H7       | Irak3       | 73914   | siRNA1 | 82960      | GGUAAAAGUGGAACAAGAGt        | CUCUUGUCCACUUUUACt              |                              |
| 118                    | IRAK3  | Ambion_Plate 2 | L15      | Irak3       | 73914   | siRNA2 | 177805     | CGAUCGGCACCUUUUAGt          | UCUAAAAGGUCGCCGAUCt             |                              |
| 118                    | IRAK3  | Ambion_Plate 2 | D21      | Irak3       | 73914   | siRNA3 | 177807     | CGAGCUAUCCACUUAAUCt         | UGAUUAAAGUGGAUAGCUCgt           |                              |
| 118                    | IRAK3  | Qiagen_Plate 2 | H7       | Irak3       | 73914   | siRNA4 | SI04451363 |                             |                                 | ATCAACGAGCTATCCACTTAA        |
| 118                    | IRAK3  | Qiagen_Plate 2 | L15      | Irak3       | 73914   | siRNA5 | SI04405457 |                             |                                 | AGCAGCAGAGTCTCACATAA         |
| 118                    | IRAK3  | Qiagen_Plate 2 | D21      | Irak3       | 73914   | siRNA6 | SI01077580 |                             |                                 | AGGGAAGTTGCTCAAATGCAA        |
| 119                    | SHP1   | Ambion_Plate 2 | I7       | Ptpn6       | 15170   | siRNA1 | 71010      | GGUGACUCAUUUCGGAUc          | GAUCCGAAUUAUGAGUCACt            |                              |
| 119                    | SHP1   | Ambion_Plate 2 | M15      | Ptpn6       | 15170   | siRNA2 | 71198      | GGAAGAGAAAGUAAAGAGt         | CUUCUUUACUUUCUCUCt              |                              |
| 119                    | SHP1   | Ambion_Plate 2 | E21      | Ptpn6       | 15170   | siRNA3 | 159276     | GCUGACAUUGAGAAUCGGt         | CCCGAUUCUAUUGUCAGCt             |                              |
| 119                    | SHP1   | Qiagen_Plate 2 | I7       | Ptpn6       | 15170   | siRNA4 | SI04919369 |                             |                                 | CTGGATCAGATCAACCAGCGA        |
| 119                    | SHP1   | Qiagen_Plate 2 | M15      | Ptpn6       | 15170   | siRNA5 | SI04919362 |                             |                                 | CTGGACATTTCTTGCGTGA          |
| 119                    | SHP1   | Qiagen_Plate 2 | E21      | Ptpn6       | 15170   | siRNA6 | SI02739961 |                             |                                 | TCGGGTCTTGGAACTGAACAA        |
| 120                    | Cyld   | Ambion_Plate 2 | J7       | Cyld        | 74256   | siRNA1 | 95627      | GGCAAGAAAAUAGAUUg           | CAUUCUGAUUUUUUCUCt              |                              |
| 120                    | Cyld   | Ambion_Plate 2 | N15      | Cyld        | 74256   | siRNA2 | 95721      | GGGAUUAUGAAUUAUUUc          | GAAAAUGAUUUCAUUCc               |                              |
| 120                    | Cyld   | Ambion_Plate 2 | F21      | Cyld        | 74256   | siRNA3 | 178797     | GGGUUGAACCAUUGUUAAt         | UUUAAACAAUGGUCAACCt             |                              |
| 120                    | Cyld   | Qiagen_Plate 2 | J7       | Cyld        | 74256   | siRNA4 | SI00963396 |                             |                                 | AAGGTTTCTATGTCATAATA         |
| 120                    | Cyld   | Qiagen_Plate 2 | N15      | Cyld        | 74256   | siRNA5 | SI00963389 |                             |                                 | AAGGGTTGAACCATGTTAAA         |
| 120                    | Cyld   | Qiagen_Plate 2 | F21      | Cyld        | 74256   | siRNA6 | SI00963382 |                             |                                 | TCCATTGAGGATGTAATAAAA        |
| 121                    | A20    | Ambion_Plate 2 | K7       | Tnfaip3     | 21929   | siRNA1 | 65012      | GGAAUUGUGGAAACAGGt          | UCCUUUCCACAAAAUUCt              |                              |
| 121                    | A20    | Ambion_Plate 2 | C16      | Tnfaip3     | 21929   | siRNA2 | 65107      | GGAAAAGCUUUAAGGAGt          | CUCUUUAGAAAGCUUUUCt             |                              |
| 121                    | A20    | Ambion_Plate 2 | G21      | Tnfaip3     | 21929   | siRNA3 | 186779     | GCUAACUUAACCAAGAAAt         | UUUCUUUGGUAAGUAGCt              |                              |
| 121                    | A20    | Qiagen_Plate 2 | K7       | Tnfaip3     | 21929   | siRNA4 | SI02668995 |                             |                                 | TTCAAAGTTAATAGTCTATTA        |
| 121                    | A20    | Qiagen_Plate 2 | C16      | Tnfaip3     | 21929   | siRNA5 | SI00184443 |                             |                                 | CCGAAGTGGACTTCACTACAA        |
| 121                    | A20    | Qiagen_Plate 2 | G21      | Tnfaip3     | 21929   | siRNA6 | SI00184436 |                             |                                 | ACAGTTGTCTTTCAAAGGATA        |
| 122                    | DUSP2  | Ambion_Plate 2 | L7       | Dusp2       | 13537   | siRNA1 | 66563      | GGCGUUUCAAAGCUUCt           | GGAAGCUUUUUAACCGCt              |                              |
| 122                    | DUSP2  | Ambion_Plate 2 | D16      | Dusp2       | 13537   | siRNA2 | 161578     | GGUUGUGUCAUUAACAAc          | UGUUUUUAUUGACACAACt             |                              |
| 122                    | DUSP2  | Ambion_Plate 2 | H21      | Dusp2       | 13537   | siRNA3 | 161579     | CGUGUGUGUCAUUGUAGGt         | CCGUAACUAGACACACGt              |                              |
| 122                    | DUSP2  | Qiagen_Plate 2 | L7       | Dusp2       | 13537   | siRNA4 | SI04918480 |                             |                                 | AACATTGAGTTGTGTCAATA         |
| 122                    | DUSP2  | Qiagen_Plate 2 | D16      | Dusp2       | 13537   | siRNA5 | SI04918473 |                             |                                 | CCGAGGGTTCCGATCTATGA         |
| 122                    | DUSP2  | Qiagen_Plate 2 | H21      | Dusp2       | 13537   | siRNA6 | SI04918466 |                             |                                 | CAGCTTCATAGACTCGGTGAA        |
| 123                    | AIP1   | Ambion_Plate 2 | M7       | Dab2ip      | 69601   | siRNA1 | 223185     | CGCGAGUUCAGAAACAGc          | GCUGUUUCUGAACUCGCGt             |                              |
| 123                    | AIP1   | Ambion_Plate 2 | E16      | Dab2ip      | 69601   | siRNA2 | 223186     | CGCACUAGGUGAGUUAUCt         | GAUGAACUCACCUAGUCGt             |                              |
| 123                    | AIP1   | Ambion_Plate 2 | I21      | Dab2ip      | 69601   | siRNA3 | 223187     | GGUUGAUGUCAGUGGAAGt         | UCUUCACUGACAUCAACt              |                              |
| 123                    | AIP1   | Qiagen_Plate 2 | M7       | Dab2ip      | 69601   | siRNA4 | SI00974148 |                             |                                 | CTGGAGGAGTATGAGACCCTA        |
| 123                    | AIP1   | Qiagen_Plate 2 | E16      | Dab2ip      | 69601   | siRNA5 | SI00974141 |                             |                                 | CAGGGATAGCTAAGGAGTAA         |
| 123                    | AIP1   | Qiagen_Plate 2 | I21      | Dab2ip      | 69601   | siRNA6 | SI00974134 |                             |                                 | CAGGTTGATGTCAGTGAAGA         |
| 124                    | Tollip | Ambion_Plate 2 | N7       | Tollip      | 54473   | siRNA1 | 77146      | GGCAAAUUGGCAAAGAAUc         | AUUCUUUGCCAUUUUCGt              |                              |
| 124                    | Tollip | Ambion_Plate 2 | F16      | Tollip      | 54473   | siRNA2 | 77331      | GGAAGAGUGAUGGUUUUAAt        | UUAAAACCAUCACUUCc               |                              |
| 124                    | Tollip | Ambion_Plate 2 | J21      | Tollip      | 54473   | siRNA3 | 186071     | GCAUCCUUCGAGUUGAUg          | CAUCAACUCAGAAGGAUGc             |                              |
| 124                    | Tollip | Qiagen_Plate 2 | N7       | Tollip      | 54473   | siRNA4 | SI01453452 |                             |                                 | CTGGGCTATGCTGTTTATGAA        |
| 124                    | Tollip | Qiagen_Plate 2 | F16      | Tollip      | 54473   | siRNA5 | SI01453445 |                             |                                 | AAGACCAATGTTTATTAATA         |
| 124                    | Tollip | Qiagen_Plate 2 | J21      | Tollip      | 54473   | siRNA6 | SI01453438 |                             |                                 | CACTATGTGCTTACTACTAAA        |
| 125                    | MKP1   | Ambion_Plate 2 | C8       | Dusp1       | 19252   | siRNA1 | 71364      | GGCUAUGACUUAUAGAc           | GUCUAUGAAGUCAUAGCt              |                              |
| 125                    | MKP1   | Ambion_Plate 2 | G16      | Dusp1       | 19252   | siRNA2 | 71455      | GGGAGAGUUGUUAUUAUc          | AAUGAACAAACACUUCc               |                              |
| 125                    | MKP1   | Ambion_Plate 2 | K21      | Dusp1       | 19252   | siRNA3 | 151971     | CGAGGCUAUGACUUAUc           | UAUGAAGUCAUAGCCUCgt             |                              |
| 125                    | MKP1   | Qiagen_Plate 2 | C8       | Dusp1       | 19252   | siRNA4 | SI04921063 |                             |                                 | AAGCGCGTGAAGCCAGATTA         |
| 125                    | MKP1   | Qiagen_Plate 2 | G16      | Dusp1       | 19252   | siRNA5 | SI04921056 |                             |                                 | ATCAGCTTCTCGGAGGATA          |
| 125                    | MKP1   | Qiagen_Plate 2 | K21      | Dusp1       | 19252   | siRNA6 | SI04921049 |                             |                                 | CCCAGTACATGCGCGTATGA         |
| 126                    | RIP3   | Ambion_Plate 2 | D8       | Ripk3       | 56532   | siRNA1 | 74827      | GGAGUUAUAGAUUAUUGc          | GCAAUGAAUCAUUAACUCt             |                              |
| 126                    | RIP3   | Ambion_Plate 2 | H16      | Ripk3       | 56532   | siRNA2 | 185795     | CCAGAGCUGUUAUUUAAt          | UUUAAAUAACAGCUCUGGt             |                              |
| 126                    | RIP3   | Ambion_Plate 2 | L21      | Ripk3       | 56532   | siRNA3 | 185797     | CCCAUCCUUAUAAAGUCAc         | UUGACUUUAAGGAGAUGGt             |                              |
| 126                    | RIP3   | Qiagen_Plate 2 | D8       | Ripk3       | 56532   | siRNA4 | SI05183514 |                             |                                 | ACCGGCTCTGCTTCAACAA          |
| 126                    | RIP3   | Qiagen_Plate 2 | H16      | Ripk3       | 56532   | siRNA5 | SI01402352 |                             |                                 | GAGGGAAACCATGTTTCTAA         |
| 126                    | RIP3   | Qiagen_Plate 2 | L21      | Ripk3       | 56532   | siRNA6 | SI01402345 |                             |                                 | CTCCTTAAAGTCAATAACAT         |







TABLE S2 MOUSE SCREEN SCORES

Table with 27 columns: Gene#, Name, Gene Symbol, Gene ID, and 23 siRNA target columns (UP5-miTNF, P1C-miTNF, R48-miTNF, etc.). Rows include genes like PIK3R1, AKT2, Egr2, and various siRNA targets. The table is a dense grid of numerical scores.







| TABLE S3 |        |                   |               |                   |               |           |                 |                     |                  |                      |                 |                     |               |               |                |               |               |               |                |                |                 |               |               |                |                  |                  |                   |                  |                  |                  |                   |                   |                    |                  |                  |                   |
|----------|--------|-------------------|---------------|-------------------|---------------|-----------|-----------------|---------------------|------------------|----------------------|-----------------|---------------------|---------------|---------------|----------------|---------------|---------------|---------------|----------------|----------------|-----------------|---------------|---------------|----------------|------------------|------------------|-------------------|------------------|------------------|------------------|-------------------|-------------------|--------------------|------------------|------------------|-------------------|
| Gene#    | Name   | Human Gene Symbol | Human Gene ID | Mouse Gene Symbol | Mouse Gene ID | Module    | Human rank TNFa | Human rank TNFa SUM | Mouse rank NF-kB | Mouse rank NF-kB SUM | Mouse rank TNFa | Mouse rank TNFa SUM | LPS-hTNF_rank | P3C-hTNF_rank | R848-hTNF_rank | P2C-hTNF_rank | PGN-hTNF_rank | FLG-hTNF_rank | LPS-mNFkB_rank | P3C-mNFkB_rank | R848-mNFkB_rank | LPS-mTNF_rank | P3C-mTNF_rank | R848-mTNF_rank | LPS-hTNF_z-score | P3C-hTNF_z-score | R848-hTNF_z-score | P2C-hTNF_z-score | PGN-hTNF_z-score | FLG-hTNF_z-score | LPS-mNFkB_z-score | P3C-mNFkB_z-score | R848-mNFkB_z-score | LPS-mTNF_z-score | P3C-mTNF_z-score | R848-mTNF_z-score |
| 123      | AIP1   | DAB2IP            | 153090        | Dab2ip            | 69601         | Regulator | 28              | 210                 | 63               | 195                  | 85              | 236                 | 41            | 22            | 24             | 37            | 30            | 56            | 70             | 94             | 31              | 77            | 62            | 97             | -0.747           | -0.984           | -0.941            | -0.741           | -0.923           | -0.555           | -0.295            | -0.076            | -0.808             | -0.261           | -0.380           | -0.020            |
| 124      | Tollip | TOLLIP            | 54472         | Tollip            | 54473         | Regulator | 40              | 281                 | 17               | 72                   | 56              | 182                 | 46            | 33            | 31             | 64            | 35            | 72            | 23             | 11             | 38              | 46            | 82            | 54             | -0.691           | -0.767           | -0.830            | -0.403           | -0.801           | -0.345           | -0.886            | -1.046            | -0.720             | -0.556           | -0.247           | -0.498            |
| 125      | MKP1   | DUSP1             | 1843          | Dusp1             | 19252         | Regulator | 123             | 683                 | 102              | 275                  | 103             | 293                 | 124           | 110           | 113            | 110           | 123           | 103           | 85             | 105            | 85              | 112           | 71            | 110            | 0.574            | 0.098            | -0.002            | 0.050            | 0.540            | -0.102           | -0.127            | 0.027             | -0.150             | 0.142            | -0.338           | 0.253             |
| 126      | RIP3   | RIPK3             | 11035         | Ripk3             | 56532         | Regulator | 106             | 544                 | 75               | 217                  | 98              | 289                 | 96            | 61            | 96             | 88            | 98            | 105           | 79             | 78             | 60              | 100           | 105           | 84             | -0.118           | -0.496           | -0.191            | -0.203           | -0.084           | -0.095           | -0.206            | -0.255            | -0.440             | -0.018           | 0.074            | -0.138            |





TABLE S4

| Gene# | Name   | Human Gene Symbol | Human Gene ID | Mouse Gene Symbol | Mouse Gene ID | Module    | LPS-hTNF_z-score | P3C-hTNF_z-score | R848-hTNF_z-score | LPS-mTNF_z-score | P3C-mTNF_z-score | R848-mTNF_z-score | LPS/hTNF-mTNF | P3C/hTNF-mTNF | R848/hTNF-mTNF | Median hTNF-mTNF |
|-------|--------|-------------------|---------------|-------------------|---------------|-----------|------------------|------------------|-------------------|------------------|------------------|-------------------|---------------|---------------|----------------|------------------|
| 115   | MD1    | LY86              | 9450          | Ly86              | 17084         | Regulator | -0.605           | -0.579           | -1.131            | 0.034            | 0.055            | -0.115            | -0.639        | -0.634        | -1.016         | -0.639           |
| 116   | TIR8   | SIGIRR            | 59307         | Sigirr            | 24058         | Regulator | -0.346           | -0.782           | -0.133            | -0.547           | -0.126           | -0.462            | 0.201         | -0.657        | 0.328          | 0.201            |
| 117   | ST2    | IL1RL1            | 9173          | Il1rl1            | 17082         | Regulator | -0.122           | -0.442           | -0.023            | -0.126           | -0.755           | -0.647            | 0.004         | 0.313         | 0.624          | 0.313            |
| 118   | IRAK3  | IRAK3             | 11213         | Irak3             | 73914         | Regulator | -0.135           | -0.402           | -0.087            | -0.645           | -0.395           | -0.206            | 0.509         | -0.007        | 0.118          | 0.118            |
| 119   | SHP1   | PTPN6             | 5777          | Ptpn6             | 15170         | Regulator | -0.900           | -0.443           | -0.653            | -0.466           | -0.671           | -0.507            | -0.433        | 0.228         | -0.146         | -0.146           |
| 120   | Cyld   | CYLD              | 1540          | Cyld              | 74256         | Regulator | -1.987           | -0.141           | -0.662            | 1.175            | 0.058            | 0.035             | -3.162        | -0.199        | -0.697         | -0.697           |
| 121   | A20    | TNFAIP3           | 7128          | Tnfaip3           | 21929         | Regulator | -0.825           | -0.624           | 0.844             | 0.726            | 0.745            | 0.271             | -1.552        | -1.370        | 0.574          | -1.370           |
| 122   | DUSP2  | DUSP2             | 1844          | Dusp2             | 13537         | Regulator | -0.236           | 0.143            | -0.707            | 0.147            | -0.368           | -0.098            | -0.383        | 0.511         | -0.609         | -0.383           |
| 123   | AIP1   | DAB2IP            | 153090        | Dab2ip            | 69601         | Regulator | -0.747           | -0.984           | -0.941            | -0.261           | -0.380           | -0.020            | -0.486        | -0.603        | -0.921         | -0.603           |
| 124   | Tollip | TOLLIP            | 54472         | Tollip            | 54473         | Regulator | -0.691           | -0.767           | -0.830            | -0.556           | -0.247           | -0.498            | -0.134        | -0.521        | -0.333         | -0.333           |
| 125   | MKP1   | DUSP1             | 1843          | Dusp1             | 19252         | Regulator | 0.574            | 0.098            | -0.002            | 0.142            | -0.338           | 0.253             | 0.432         | 0.436         | -0.255         | 0.432            |
| 126   | RIP3   | RIPK3             | 11035         | Ripk3             | 56532         | Regulator | -0.118           | -0.496           | -0.191            | -0.018           | 0.074            | -0.138            | -0.100        | -0.569        | -0.053         | -0.100           |
